# Supplementary material for: Genome-wide map of regulatory interactions in the human genome
Source: Genome Res. 2014 Dec;24(12):1905–17. doi: 10.1101/gr.176586.114 (PMC4248309; doi:10.1101/gr.176586.114)
Supplement: Supplemental Material [file supp_gr.176586.114_TableS1.xlsx]

## Sheet: K562 interactions
Table S1. K562 interactions
Anchor region 1			Anchor region 2			interaction distance	Anchor region 1 reads	Anchor region 2 reads	PETs linking Anchor 1 and 2	raw score	Z-score	dataset
chrom	start	stop	chrom	start	stop
chr16	67051777	67052140	chr16	67219330	67219692	167190	69	59	5	-5.09277	2.01094	RAD21
chr16	67051777	67052140	chr16	67189195	67189590	137055	69	74	10	-3.933	2.98599	RAD21
chr3	12176632	12176862	chr3	12521198	12521669	344336	49	129	8	-4.59275	2.82775	RAD21
chr6	150155614	150156141	chr6	150219343	150219766	63202	76	70	8	-4.42035	2.07922	RAD21
chr5	135418243	135418396	chr5	135509791	135510114	91395	30	20	3	-4.19971	2.48023	RAD21
chr2	27069167	27069560	chr2	27145660	27145941	76100	73	34	5	-4.59794	2.00177	RAD21
chr2	27069167	27069560	chr2	27165455	27165863	95895	73	63	9	-4.03915	2.66141	RAD21
chr11	3058565	3058896	chr11	3112941	3113456	54045	43	84	18	-2.41127	3.79734	RAD21
chr9	135383002	135383554	chr9	135674405	135674776	290851	90	102	11	-4.32899	3.01099	RAD21
chr9	135383002	135383554	chr9	135675596	135675844	292042	90	132	10	-4.77744	2.61633	RAD21
chr10	50209346	50209672	chr10	50372699	50372874	163027	30	46	3	-5.03261	2.05036	RAD21
chr1	157939607	157939832	chr1	158057121	158057439	117289	17	28	3	-3.96819	2.863	RAD21
chr10	4857558	4857733	chr10	5425908	5426259	568175	58	34	3	-5.38958	2.229	RAD21
chr16	17352768	17353019	chr16	17561853	17562086	208834	11	30	3	-3.60187	3.49224	RAD21
chr17	7418130	7418408	chr17	7464956	7465250	46548	37	155	13	-3.52444	2.72055	RAD21
chrX	69549591	69549786	chrX	69653714	69654041	103928	8	46	3	-3.71086	3.02576	RAD21
chrX	69549591	69549786	chrX	69653220	69653654	103434	8	45	3	-3.68888	3.04309	RAD21
chr16	87964059	87964398	chr16	88503718	88504084	539320	42	54	5	-4.50778	2.9543	RAD21
chr1	21697112	21697361	chr1	21817384	21817573	120023	96	28	7	-4.00473	2.84339	RAD21
chr1	21697112	21697361	chr1	21824286	21824536	126925	96	26	5	-4.60357	2.31663	RAD21
chr2	113384169	113384496	chr2	113485510	113485834	101014	108	223	30	-3.28691	3.40343	RAD21
chr1	156426194	156426541	chr1	156577857	156578248	151316	74	61	7	-4.52312	2.48145	RAD21
chr1	156426194	156426541	chr1	156578932	156579210	152391	74	69	7	-4.64635	2.3705	RAD21
chr1	151416270	151416861	chr1	151495839	151496012	78978	79	26	12	-2.65773	3.83152	RAD21
chr4	7805816	7806084	chr4	7852295	7852524	46211	35	33	6	-3.46834	2.76413	RAD21
chr19	1279792	1280168	chr19	1371685	1371809	91517	51	40	7	-3.72888	2.92169	RAD21
chr13	44765638	44765984	chr13	45011946	45012470	245962	16	98	5	-4.13868	3.09506	RAD21
chr3	36833903	36834137	chr3	36999529	36999857	165392	46	179	9	-4.62158	2.43734	RAD21
chr3	36833903	36834137	chr3	36999915	37000798	165778	46	215	9	-4.80483	2.27027	RAD21
chr19	42612740	42613018	chr19	42937710	42938099	324692	69	56	4	-5.48687	2.03775	RAD21
chr2	192029833	192030296	chr2	192386375	192386676	356079	31	27	3	-4.5326	2.87807	RAD21
chr4	57534537	57534722	chr4	57666230	57666654	131508	19	42	3	-4.48488	2.44965	RAD21
chr4	57534537	57534722	chr4	57666072	57666192	131350	19	32	3	-4.21295	2.70412	RAD21
chr3	152761433	152761644	chr3	152891631	152891759	129987	107	57	11	-3.92009	2.97303	RAD21
chr3	152761433	152761644	chr3	152891934	152892283	130290	107	67	11	-4.08173	2.82265	RAD21
chr7	2926662	2927046	chr7	3194318	3194831	267272	65	85	16	-3.07186	4.08755	RAD21
chr4	174341536	174341835	chr4	174415518	174415806	73683	46	24	6	-3.42318	3.07809	RAD21
chr6	721998	722370	chr6	1397126	1397249	674756	70	30	4	-4.8771	2.663	RAD21
chr6	721998	722370	chr6	1397269	1397537	674899	70	39	4	-5.13947	2.44942	RAD21
chr16	67312492	67312982	chr16	67433323	67433634	120341	65	42	5	-4.69318	2.19759	RAD21
chr10	75534506	75535228	chr10	75639350	75639933	104122	144	108	11	-4.85615	1.95144	RAD21
chr19	54410050	54410269	chr19	54534602	54534752	124333	27	30	4	-3.92445	2.94167	RAD21
chr6	30910451	30910743	chr6	31051888	31052036	141145	28	45	3	-4.94164	2.05741	RAD21
chr18	77929224	77929360	chr18	78015807	78015961	86447	14	16	5	-2.19277	4.32318	RAD21
chrX	10158355	10158723	chrX	11155718	11155949	996995	87	30	5	-4.64823	2.80411	RAD21
chrX	10158355	10158723	chrX	10604455	10604736	445732	87	39	6	-4.54595	2.89723	RAD21
chrX	10158355	10158723	chrX	10690865	10691142	532142	87	30	5	-4.64823	2.83719	RAD21
chr20	37274854	37275304	chr20	37379891	37380323	104587	104	95	15	-3.78217	2.96313	RAD21
chr13	27281960	27282080	chr13	27447069	27447279	164989	8	15	4	-2.0149	4.83309	RAD21
chr6	108581276	108581444	chr6	108813375	108813649	231931	41	53	4	-4.91128	2.3701	RAD21
chr6	33819754	33819977	chr6	33995323	33995733	175346	21	73	5	-4.11611	2.93557	RAD21
chr6	20127029	20127397	chr6	20212752	20213153	85355	38	55	5	-4.42604	2.22538	RAD21
chr2	38604272	38604510	chr2	38735442	38735805	130932	85	75	9	-4.36569	2.55898	RAD21
chr7	99998333	99998731	chr7	100054238	100054430	55507	86	37	8	-3.90638	2.48118	RAD21
chr19	10381601	10381876	chr19	10499580	10499939	117704	138	94	22	-3.28846	3.5047	RAD21
chr15	50169105	50169228	chr15	50295837	50296277	126609	20	35	5	-3.3322	3.50958	RAD21
chr18	54415928	54416308	chr18	54662892	54663052	246584	43	12	3	-4.04888	3.17667	RAD21
chr18	54415928	54416308	chr18	55113539	55113864	697231	43	40	4	-4.67749	2.82667	RAD21
chr4	16291548	16291923	chr4	17326079	17326295	1034156	42	26	4	-4.22318	3.12934	RAD21
chr17	1268669	1269099	chr17	1436479	1436835	167380	37	30	3	-4.81489	2.26697	RAD21
chr1	152842397	152842588	chr1	153165136	153165459	322548	38	38	3	-5.07795	2.39302	RAD21
chr4	169104872	169105220	chr4	169838619	169838925	733399	32	18	5	-3.13723	4.07311	RAD21
chr8	38269142	38269350	chr8	38578807	38579243	309457	89	49	5	-5.16158	2.30316	RAD21
chr8	38269142	38269350	chr8	38571912	38572161	302562	89	39	7	-4.26038	3.08706	RAD21
chr11	64685029	64685160	chr11	64764206	64764681	79046	42	90	7	-4.34566	2.25713	RAD21
chr5	154029750	154030041	chr5	154191099	154191853	161058	103	83	15	-3.63747	3.32791	RAD21
chr1	211687256	211687734	chr1	211828454	211828945	140720	174	149	13	-5.0331	1.97065	RAD21
chr1	211687256	211687734	chr1	211750905	211751789	63171	174	198	21	-4.35828	2.13591	RAD21
chr8	71060062	71060897	chr8	71446551	71447187	385654	99	121	24	-3.0348	4.15962	RAD21
chr11	116750612	116750860	chr11	116976720	116977049	225860	34	61	5	-4.41836	2.79707	RAD21
chr21	32470839	32471173	chr21	32552909	32553151	81736	20	19	5	-2.7213	3.79294	RAD21
chr2	84722746	84722965	chr2	84858299	84858519	135334	25	23	4	-3.58178	3.3097	RAD21
chr5	177736462	177736682	chr5	178017351	178017529	280669	15	82	3	-4.91754	2.47256	RAD21
chr5	177736462	177736682	chr5	178017549	178018072	280867	15	99	3	-5.10595	2.30592	RAD21
chr11	125422912	125423142	chr11	125741405	125741547	318263	49	14	3	-4.33365	3.0404	RAD21
chr2	84722746	84722965	chr2	85092266	85092585	369301	25	55	7	-3.33439	3.90376	RAD21
chr4	10161993	10162216	chr4	10539522	10539897	377306	54	43	4	-4.9776	2.50135	RAD21
chr4	10161993	10162216	chr4	10405012	10405706	242796	54	218	13	-4.24358	2.99418	RAD21
chr12	69684576	69685212	chr12	69977055	69977337	291843	83	40	4	-5.33513	2.12302	RAD21
chr12	69684576	69685212	chr12	69964511	69964888	279299	83	56	5	-5.22532	2.19703	RAD21
chr17	7418130	7418408	chr17	7463804	7464748	45396	37	136	13	-3.39367	2.8166	RAD21
chr17	7766056	7766372	chr17	7893536	7893753	127164	32	94	5	-4.79015	2.14254	RAD21
chr10	25016854	25017148	chr10	25240487	25240721	223339	57	55	4	-5.2778	2.01796	RAD21
chr10	25016854	25017148	chr10	25278886	25279029	261738	57	31	4	-4.70445	2.62441	RAD21
chr1	44229000	44229585	chr1	44399937	44400811	170352	106	124	27	-2.89205	4.0425	RAD21
chr1	44229000	44229585	chr1	44376050	44376259	146465	106	18	5	-4.33494	2.64106	RAD21
chr11	65042521	65043008	chr11	65097009	65097207	54001	81	51	9	-3.93183	2.44439	RAD21
chr11	65042521	65043008	chr11	65097354	65097707	54346	81	58	9	-4.06044	2.33304	RAD21
chr12	92538487	92538801	chr12	92963857	92964482	425056	108	121	9	-5.08347	2.4336	RAD21
chr20	24975510	24975822	chr20	25046418	25046741	70596	58	28	8	-3.23376	3.2296	RAD21
chr2	55646867	55647241	chr2	55719041	55719198	71800	39	17	3	-4.29955	2.24995	RAD21
chr2	55646867	55647241	chr2	55738708	55738955	91467	39	23	3	-4.60183	2.10441	RAD21
chr10	75013080	75013219	chr10	75173197	75173436	159978	43	46	4	-4.81725	2.23717	RAD21
chr10	75013080	75013219	chr10	75173457	75174081	160238	43	56	4	-5.01396	2.05688	RAD21
chr2	64557987	64558397	chr2	64715042	64715465	156645	65	65	17	-2.68235	4.19628	RAD21
chr15	65023426	65023897	chr15	65102146	65102555	78249	66	70	7	-4.54633	2.06448	RAD21
chr7	42981302	42981422	chr7	43144564	43144881	163142	112	42	13	-3.32627	3.6212	RAD21
chr6	129820091	129820601	chr6	129888523	129888945	67922	85	48	10	-3.70868	2.76937	RAD21
chr12	14999227	14999347	chr12	15148694	15149043	149347	36	44	5	-4.14883	2.82274	RAD21
chr10	11557668	11558176	chr10	11767111	11767598	208935	105	100	28	-2.59472	4.40262	RAD21
chr3	5468100	5468476	chr3	5561967	5562191	93491	74	36	5	-4.66871	2.05572	RAD21
chr11	46411003	46411276	chr11	46550851	46551281	139575	67	49	5	-4.87764	2.11161	RAD21
chr7	75807337	75807850	chr7	75892251	75892587	84401	110	46	8	-4.37024	2.27089	RAD21
chr12	8085836	8086110	chr12	8147775	8147896	61665	47	46	11	-2.883	3.47295	RAD21
chr12	8085836	8086110	chr12	8147919	8148224	61809	47	56	11	-3.07971	3.29471	RAD21
chr11	56898606	56898895	chr11	57016560	57016803	117665	41	77	17	-2.39095	4.34881	RAD21
chr2	232770828	232771236	chr2	233006769	233007085	235533	46	69	9	-3.6683	3.49281	RAD21
chr4	110926644	110927053	chr4	111132365	111132759	205312	77	32	5	-4.59067	2.58999	RAD21
chr4	75242569	75242950	chr4	75397630	75397916	154680	104	100	18	-3.46882	3.46558	RAD21
chr4	75242569	75242950	chr4	75548202	75548572	305252	104	81	9	-4.64439	2.75235	RAD21
chr4	75242569	75242950	chr4	75596331	75596662	353381	104	110	12	-4.37506	3.01442	RAD21
chr22	37663084	37663453	chr22	37710973	37711167	47520	20	27	6	-2.70805	3.43678	RAD21
chr3	182431923	182432340	chr3	182555590	182556157	123250	74	52	19	-2.36643	4.40087	RAD21
chr2	30936960	30937319	chr2	31556396	31556745	619077	42	33	3	-5.03695	2.52654	RAD21
chr5	171339083	171339533	chr5	171472062	171472281	132529	60	27	9	-2.99573	3.85037	RAD21
chr14	76517217	76517507	chr14	76853481	76853814	335974	57	28	6	-3.79174	3.52391	RAD21
chr3	194392838	194393217	chr3	194979951	194981178	586734	52	199	8	-5.08567	2.48215	RAD21
chr1	67461552	67462165	chr1	67614660	67615221	152495	78	77	12	-3.7307	3.21829	RAD21
chr8	8887335	8887695	chr8	9007141	9007729	119446	61	167	10	-4.6237	2.25808	RAD21
chr1	12184936	12185313	chr1	12304197	12304446	118884	80	42	6	-4.53618	2.33735	RAD21
chr1	12184936	12185313	chr1	12303766	12303970	118453	80	35	6	-4.35386	2.50651	RAD21
chr11	78357624	78357988	chr11	78787700	78787880	429712	73	16	5	-3.84417	3.4801	RAD21
chr11	78357624	78357988	chr11	78426797	78427050	68809	73	28	14	-2.34455	4.03801	RAD21
chr1	19567711	19568018	chr1	19977489	19977991	409471	72	99	5	-5.65291	1.94371	RAD21
chrX	69253342	69253534	chrX	69317327	69317489	63793	22	30	5	-3.27336	3.13651	RAD21
chr6	110499693	110500100	chr6	110712007	110712405	211907	63	79	18	-2.73184	4.28414	RAD21
chr6	147223483	147223998	chr6	147605997	147606117	381999	124	52	5	-5.55265	2.01345	RAD21
chr6	34024047	34024200	chr6	34122470	34122894	98270	37	129	11	-3.67494	3.01959	RAD21
chr11	72300889	72301084	chr11	72395611	72395844	94527	65	143	10	-4.53206	2.19051	RAD21
chr11	72300889	72301084	chr11	72394720	72395207	93636	65	123	9	-4.59212	2.12837	RAD21
chr1	201678661	201679003	chr1	201752813	201752995	73810	108	27	8	-3.81909	2.71081	RAD21
chr16	10762430	10762550	chr16	11012520	11012974	249970	8	49	3	-3.77404	3.42944	RAD21
chr15	89019749	89020323	chr15	89244819	89245105	224496	38	30	3	-4.84156	2.41327	RAD21
chr10	23447012	23447720	chr10	23582139	23582452	134419	59	41	8	-3.63223	3.25976	RAD21
chr3	98321004	98321234	chr3	98531728	98531907	210494	28	25	4	-3.77849	3.33624	RAD21
chr2	122289909	122290045	chr2	122407004	122407363	116959	90	46	7	-4.43663	2.42053	RAD21
chr2	122289909	122290045	chr2	122407522	122407757	117477	90	56	7	-4.63334	2.2383	RAD21
chr4	89447486	89447628	chr4	89580507	89580873	132879	22	35	4	-3.8738	3.02822	RAD21
chr1	120413596	120413966	chr1	120510595	120510890	96629	70	32	7	-3.82241	2.8696	RAD21
chr17	28453192	28453347	chr17	28663456	28663969	210109	65	98	11	-3.96356	3.16822	RAD21
chr16	89989619	89989801	chr16	90085942	90086093	96141	27	35	3	-4.65396	2.0872	RAD21
chr15	84107340	84107842	chr15	84240918	84241197	133076	65	32	8	-3.48124	3.39695	RAD21
chr6	89693341	89693531	chr6	89952307	89952601	258776	60	58	11	-3.359	3.81732	RAD21
chr6	89693341	89693531	chr6	89832240	89832672	138709	60	32	5	-4.3412	2.60947	RAD21
chr3	183613044	183613470	chr3	183735169	183735866	121699	69	95	7	-4.89616	2.01408	RAD21
chr14	102990897	102991316	chr14	103060933	103061302	69617	54	90	16	-2.94362	3.4905	RAD21
chr14	102990897	102991316	chr14	103059711	103059860	68395	54	86	20	-2.45187	3.93505	RAD21
chr17	28353839	28353985	chr17	28420542	28420978	66557	26	154	15	-2.87895	3.52431	RAD21
chr18	67863143	67863391	chr18	68117920	68118273	254529	20	21	4	-3.26767	3.89063	RAD21
chr18	67863143	67863391	chr18	68101148	68101462	237757	20	29	5	-3.14415	3.96696	RAD21
chr16	68881231	68881474	chr16	69157942	69158253	276468	37	40	3	-5.10257	2.3003	RAD21
chr3	155523684	155524354	chr3	155588077	155588575	63723	78	111	12	-4.09643	2.38026	RAD21
chr8	18066445	18066698	chr8	18422362	18422788	355664	34	47	7	-3.48469	3.78085	RAD21
chr3	122746762	122746892	chr3	122977683	122977957	230791	55	26	3	-5.06821	2.22637	RAD21
chr3	52885426	52885775	chr3	53106567	53106964	220792	40	47	4	-4.76644	2.47102	RAD21
chr6	157548909	157549124	chr6	157695717	157696126	146593	44	102	13	-3.27926	3.62223	RAD21
chr11	124537702	124537822	chr11	124706925	124707673	169103	87	114	12	-4.23229	2.80824	RAD21
chr11	61584338	61584683	chr11	61638503	61639067	53820	67	172	19	-3.46331	2.85909	RAD21
chr17	49450100	49450376	chr17	49613270	49613491	162894	64	38	8	-3.63759	3.33386	RAD21
chr17	49450100	49450376	chr17	49617582	49617809	167206	64	26	6	-3.83346	3.16811	RAD21
chr11	46563663	46563809	chr11	46639045	46639593	75236	32	74	7	-3.87798	2.66637	RAD21
chr1	67230653	67231174	chr1	67461552	67462165	230378	76	78	7	-4.79562	2.46984	RAD21
chr1	67230653	67231174	chr1	67614660	67615221	383486	76	77	9	-4.28009	3.09868	RAD21
chrX	106268815	106269068	chrX	107137342	107137600	868274	18	45	3	-4.49981	2.95084	RAD21
chr1	26496225	26496820	chr1	26560164	26560806	63344	71	125	12	-4.12118	2.35466	RAD21
chr1	26496225	26496820	chr1	26560825	26561028	64005	71	148	12	-4.29008	2.20452	RAD21
chrX	13676761	13677160	chrX	13766040	13766310	88880	31	28	6	-3.18267	3.41424	RAD21
chr19	51227491	51228538	chr19	51286711	51287178	58173	119	126	21	-3.52636	2.84979	RAD21
chr11	2553952	2554509	chr11	2950894	2951014	396385	235	69	9	-5.29924	2.23665	RAD21
chr11	2553952	2554509	chr11	2906251	2906508	351742	235	114	16	-4.65061	2.77698	RAD21
chr11	2553952	2554509	chr11	2909624	2909962	355115	235	143	47	-2.72213	4.43829	RAD21
chr11	2553952	2554509	chr11	2913369	2913541	358860	235	101	28	-3.4103	3.84287	RAD21
chr11	2553952	2554509	chr11	2951688	2951923	397179	235	72	10	-5.13108	2.37971	RAD21
chr11	2553952	2554509	chr11	2952001	2952293	397492	235	69	9	-5.29924	2.23716	RAD21
chr11	4203395	4203640	chr11	4560917	4561153	357277	29	38	3	-4.80766	2.64113	RAD21
chr1	71436177	71436374	chr1	71513478	71513724	77104	21	48	4	-4.14313	2.43256	RAD21
chr19	56215186	56215374	chr19	56320846	56321131	105472	38	23	3	-4.57586	2.22318	RAD21
chr1	6546600	6546871	chr1	6706516	6706875	159645	50	58	6	-4.38895	2.63068	RAD21
chr15	62127638	62127997	chr15	62363965	62364204	235968	51	34	4	-4.6856	2.58252	RAD21
chr11	11811392	11811579	chr11	12065650	12066236	254071	38	108	7	-4.4279	2.85468	RAD21
chr5	56594058	56594412	chr5	56795306	56795635	200894	57	17	4	-4.10368	3.02053	RAD21
chr4	155558926	155559153	chr4	155700554	155700920	141401	20	50	6	-3.32424	3.56536	RAD21
chr14	60099181	60099380	chr14	60155321	60155441	55941	18	10	3	-2.99573	3.30143	RAD21
chr5	131146627	131146951	chr5	131399139	131399476	252188	40	122	7	-4.60108	2.69602	RAD21
chr5	131146627	131146951	chr5	131400461	131401380	253510	40	220	7	-5.19069	2.1729	RAD21
chr1	160162805	160163412	chr1	160221648	160222023	58236	123	50	9	-4.32976	2.12422	RAD21
chr22	18312780	18313245	chr22	18558748	18559172	245503	84	130	16	-3.75317	3.43854	RAD21
chr12	75920777	75921056	chr12	76425213	76425631	504157	35	79	4	-5.15221	2.41316	RAD21
chr22	24817386	24817894	chr22	24921360	24921708	103466	50	70	9	-3.76607	2.97083	RAD21
chr1	173226957	173227156	chr1	173389082	173390069	161926	35	113	5	-5.06386	2.01738	RAD21
chr12	54920942	54921198	chr12	54965070	54965231	43872	33	14	3	-3.93834	2.33694	RAD21
chr17	33882729	33883045	chr17	34074466	34074793	191421	53	65	8	-3.9858	3.10346	RAD21
chr20	57443836	57444114	chr20	58071022	58071238	626908	81	19	3	-5.14166	2.44182	RAD21
chr20	55956802	55957255	chr20	56070037	56070606	112782	99	105	18	-3.46834	3.30788	RAD21
chr9	34332435	34332706	chr9	34379330	34379809	46624	72	85	24	-2.36321	3.71698	RAD21
chr2	71451145	71451410	chr2	71509716	71509881	58306	19	17	3	-3.58043	2.80231	RAD21
chr1	70500117	70500636	chr1	70975742	70976065	475106	84	53	4	-5.62852	2.00439	RAD21
chr12	48680461	48680755	chr12	48848399	48848769	167644	14	50	3	-4.35386	2.6915	RAD21
chr17	49449063	49449372	chr17	49613270	49613491	163898	52	38	8	-3.42995	3.52822	RAD21
chr17	49449063	49449372	chr17	49617582	49617809	168210	52	26	6	-3.62582	3.36218	RAD21
chr1	65528814	65529016	chr1	65674879	65675414	145863	47	66	8	-3.88092	3.06094	RAD21
chr15	64754059	64754273	chr15	64945968	64946269	191695	58	27	3	-5.15906	2.03642	RAD21
chr12	93419317	93419582	chr12	93790627	93790912	371045	52	38	3	-5.39161	2.14373	RAD21
chr19	49149171	49149310	chr19	49241004	49241155	91694	133	104	11	-4.73895	1.97768	RAD21
chr2	160414026	160414305	chr2	160534198	160534565	119893	29	35	3	-4.72542	2.16483	RAD21
chr2	160414026	160414305	chr2	160568099	160568504	153794	29	99	7	-4.0706	2.90708	RAD21
chr2	160414026	160414305	chr2	160568715	160569091	154410	29	119	7	-4.2546	2.73861	RAD21
chr3	156922164	156922459	chr3	157211399	157211865	288940	63	67	11	-3.55204	3.69548	RAD21
chr19	7149205	7149514	chr19	7406030	7406271	256516	20	30	4	-3.62434	3.57642	RAD21
chr10	112369940	112370439	chr10	112440826	112441186	70387	56	25	9	-2.84978	3.5838	RAD21
chr18	71909686	71910190	chr18	71998692	71998954	88502	76	26	6	-4.00531	2.64161	RAD21
chr18	71909686	71910190	chr18	72009625	72010027	99435	76	76	12	-3.69165	3.01232	RAD21
chr5	75699602	75700089	chr5	75838725	75839035	138636	130	69	16	-3.55646	3.342	RAD21
chr5	141071032	141072279	chr5	141258684	141259144	186405	125	72	7	-5.21316	1.96961	RAD21
chr2	75691781	75692009	chr2	75836278	75836507	144269	20	35	5	-3.3322	3.56582	RAD21
chr17	37139370	37139740	chr17	37308932	37309572	169192	63	142	17	-3.43254	3.54283	RAD21
chr8	130837755	130837875	chr8	130903982	130904239	66107	44	34	4	-4.53796	1.99097	RAD21
chr6	24581406	24581650	chr6	24766901	24767355	185251	43	33	3	-5.06048	2.10495	RAD21
chr11	61665172	61665412	chr11	61714855	61714989	49443	161	154	33	-3.12534	3.10454	RAD21
chr11	102238158	102238455	chr11	102366068	102366574	127613	27	59	6	-3.78986	3.08443	RAD21
chr19	51661730	51662332	chr19	51762521	51763134	100189	90	178	30	-2.8792	3.7799	RAD21
chr19	51661730	51662332	chr19	51761497	51761649	99165	90	117	25	-2.82423	3.8238	RAD21
chr3	51426903	51427101	chr3	51716105	51716413	289004	40	47	3	-5.3418	2.11215	RAD21
chr1	204415581	204415804	chr1	204463014	204463244	47210	91	79	21	-2.79126	3.35994	RAD21
chr18	77140878	77141192	chr18	77403951	77404411	262759	59	49	8	-3.81047	3.42253	RAD21
chr1	115681482	115681887	chr1	116138381	116138747	456494	31	32	4	-4.12713	3.25329	RAD21
chr17	262125	262407	chr17	603829	604136	341422	31	34	3	-4.76312	2.67985	RAD21
chr12	132320877	132321012	chr12	132434158	132434574	113146	24	38	4	-4.04305	2.76944	RAD21
chr12	122501323	122501483	chr12	122601331	122601567	99848	49	42	5	-4.41061	2.34094	RAD21
chr10	15304084	15304335	chr10	15413506	15413637	109171	31	45	4	-4.46806	2.34667	RAD21
chr11	33709475	33709754	chr11	33764051	33764378	54297	56	44	7	-3.91772	2.45969	RAD21
chr19	46785642	46785909	chr19	47016606	47017041	230697	60	74	5	-5.17953	2.12625	RAD21
chrX	39957160	39957334	chrX	40028568	40028764	71234	38	41	4	-4.57857	1.98723	RAD21
chr7	29917703	29918003	chr7	30101468	30101588	183465	43	51	6	-4.10951	2.96706	RAD21
chr3	186332677	186332932	chr3	186539653	186539839	206721	66	52	5	-4.92202	2.29374	RAD21
chr5	142128217	142128553	chr5	142260123	142260565	131570	38	74	12	-2.97184	3.86943	RAD21
chr10	64197410	64197716	chr10	64917807	64918304	720091	38	100	4	-5.47017	2.18518	RAD21
chr9	137977840	137978484	chr9	138235797	138236159	257313	73	35	6	-4.26229	3.00925	RAD21
chr1	32681249	32681668	chr1	32782989	32783171	101321	78	51	8	-4.12965	2.6148	RAD21
chr1	32681249	32681668	chr1	32782510	32782643	100842	78	47	8	-4.04797	2.68809	RAD21
chr8	95654570	95654817	chr8	95725693	95725934	70876	31	31	4	-4.09539	2.43289	RAD21
chr16	23689776	23690331	chr16	24021686	24022168	331355	62	66	4	-5.5442	1.99485	RAD21
chr11	75258443	75259001	chr11	75512139	75512303	253138	86	42	4	-5.41943	1.96794	RAD21
chr18	77915677	77915943	chr18	78015807	78015961	99864	22	16	3	-3.66641	3.03909	RAD21
chr19	56764126	56764516	chr19	56844894	56845226	80378	114	57	17	-3.11282	3.41719	RAD21
chr10	15944481	15944893	chr10	16587078	16587461	642185	29	33	4	-4.09121	3.30211	RAD21
chr11	76092032	76092502	chr11	76155580	76155783	63078	30	42	5	-3.91999	2.53707	RAD21
chr16	87622450	87622823	chr16	87669687	87670441	46864	31	123	7	-4.35435	2.0121	RAD21
chr16	87622450	87622823	chr16	87802719	87803152	179896	31	40	4	-4.35028	2.73579	RAD21
chr1	118358691	118358950	chr1	118471415	118471654	112465	20	39	3	-4.46207	2.37145	RAD21
chr1	118358691	118358950	chr1	118437981	118438101	79031	20	41	5	-3.49043	3.05498	RAD21
chr1	90098448	90098895	chr1	90169148	90169268	70253	90	18	4	-4.61759	1.94462	RAD21
chr1	90098448	90098895	chr1	90228487	90229132	129592	90	108	25	-2.74419	4.07523	RAD21
chr4	74904504	74905075	chr4	74965005	74965172	59930	91	71	14	-3.49542	2.89617	RAD21
chr13	113597091	113597358	chr13	113683918	113684130	86560	22	17	4	-3.15167	3.4266	RAD21
chr7	25299339	25299704	chr7	25430933	25431226	131229	76	87	7	-4.90482	2.05441	RAD21
chr7	25299339	25299704	chr7	25429087	25429532	129383	76	90	24	-2.47444	4.32762	RAD21
chr15	64486272	64486426	chr15	64648303	64649025	161877	17	74	3	-4.94005	2.13118	RAD21
chr6	109508994	109509495	chr6	109703974	109704131	194479	108	125	15	-4.09434	3.01304	RAD21
chr6	109508994	109509495	chr6	109704213	109704751	194718	108	150	15	-4.27667	2.84794	RAD21
chr6	109508994	109509495	chr6	109703613	109703769	194118	108	121	13	-4.34802	2.78142	RAD21
chr6	109508994	109509495	chr6	109718186	109718714	208691	108	92	14	-3.92581	3.19917	RAD21
chr20	37274854	37275304	chr20	37377016	37377136	101712	104	42	7	-4.49024	2.27908	RAD21
chr9	137035933	137036212	chr9	137335151	137335543	298939	58	86	16	-2.96961	4.22096	RAD21
chr19	4267083	4267935	chr19	4352670	4353050	84735	104	27	10	-3.33506	3.24168	RAD21
chr7	73831715	73832195	chr7	73981029	73981384	148834	91	50	6	-4.83936	2.1806	RAD21
chr6	154475503	154475927	chr6	154936718	154937088	460791	43	43	3	-5.32518	2.25108	RAD21
chr21	33756309	33756448	chr21	33973168	33973586	216720	8	58	3	-3.94266	3.20252	RAD21
chr5	180470339	180470699	chr5	180578238	180578460	107539	105	29	5	-4.80238	2.02279	RAD21
chr1	100929404	100929545	chr1	101333898	101334330	404353	18	62	3	-4.82028	2.646	RAD21
chr15	81447915	81448329	chr15	81549307	81549652	100978	53	65	10	-3.53951	3.16615	RAD21
chr1	51395083	51395391	chr1	51655006	51655645	259615	24	139	4	-5.33994	2.05369	RAD21
chr4	88774282	88774520	chr4	88894799	88895035	120279	21	24	4	-3.44999	3.36653	RAD21
chr5	43556938	43557112	chr5	43627219	43627392	70107	27	30	4	-3.92445	2.58584	RAD21
chrX	122967183	122967540	chrX	123018709	123019090	51169	86	32	7	-4.02826	2.33359	RAD21
chr21	40685777	40686072	chr21	40760336	40760841	74264	85	165	24	-3.19249	3.29721	RAD21
chr21	40685777	40686072	chr21	40759624	40759888	73552	85	123	21	-3.16579	3.31644	RAD21
chr2	100879311	100879789	chr2	100997669	100997968	117880	117	71	36	-1.85782	4.85149	RAD21
chr14	75413008	75413506	chr14	75555144	75555696	141638	66	69	9	-4.02931	2.9091	RAD21
chr14	75413008	75413506	chr14	75469196	75469712	55690	66	34	6	-4.1325	2.28046	RAD21
chr1	53731805	53732027	chr1	53858883	53859299	126856	24	159	7	-4.35514	2.54969	RAD21
chr3	47891561	47891804	chr3	48192978	48193437	301174	29	95	8	-3.76229	3.52432	RAD21
chr2	113239645	113239790	chr2	113339962	113340115	100172	81	47	6	-4.66108	2.10824	RAD21
chr2	113239645	113239790	chr2	113341038	113341477	101248	81	80	8	-4.61759	2.1564	RAD21
chr18	34349681	34349930	chr18	34408943	34409311	59013	14	50	3	-4.35386	2.10857	RAD21
chr10	12084735	12084992	chr10	12171446	12171751	86454	29	43	5	-3.90962	2.71648	RAD21
chr2	26695266	26695476	chr2	26800714	26801038	105238	42	93	11	-3.47448	3.25634	RAD21
chr12	118620046	118620581	chr12	118813415	118813579	192834	79	191	40	-2.24396	4.69191	RAD21
chr12	118620046	118620581	chr12	118813229	118813387	192648	79	176	39	-2.21281	4.71986	RAD21
chr15	89600531	89601284	chr15	89714703	89715014	113419	108	23	6	-4.23411	2.5913	RAD21
chr3	132449970	132450280	chr3	132760044	132760450	309764	50	71	4	-5.40211	2.09218	RAD21
chr8	29198964	29199149	chr8	29504920	29505126	305771	80	18	4	-4.49981	2.88027	RAD21
chr11	30367719	30368077	chr11	30939497	30939729	571420	24	18	7	-2.17661	4.87883	RAD21
chr17	55935355	55935714	chr17	56190371	56190804	254657	67	74	7	-4.61694	2.68732	RAD21
chr10	80886988	80887291	chr10	80955096	80955528	67805	38	123	7	-4.55795	1.98377	RAD21
chr2	68978835	68979343	chr2	69136995	69137229	157652	77	54	5	-5.11391	1.95523	RAD21
chr4	122871346	122871730	chr4	122924503	122924874	52773	51	51	10	-3.25848	3.02907	RAD21
chr1	161834443	161834743	chr1	161994055	161994320	159312	31	25	3	-4.45564	2.56805	RAD21
chr1	161834443	161834743	chr1	162006818	162007140	172075	31	74	4	-4.96546	2.146	RAD21
chr15	76483103	76483556	chr15	77133156	77133595	649600	69	23	3	-5.17238	2.41969	RAD21
chr3	150643409	150643806	chr3	150863752	150864224	219946	29	61	4	-4.70558	2.52356	RAD21
chrX	12516048	12516231	chrX	12720718	12720846	204487	10	47	5	-2.93386	4.08794	RAD21
chr11	10814032	10814501	chr11	11043724	11044211	229223	59	123	16	-3.34454	3.76921	RAD21
chr5	39376226	39376820	chr5	39570571	39570837	193751	116	25	4	-5.19988	2.00575	RAD21
chr4	129112423	129112878	chr4	129300936	129301351	188058	50	19	3	-4.65924	2.48005	RAD21
chr2	220406293	220406751	chr2	220554417	220554772	147666	59	72	6	-4.77068	2.24043	RAD21
chr2	220406293	220406751	chr2	220507209	220507536	100458	59	82	14	-3.20614	3.47517	RAD21
chr12	122134958	122135360	chr12	122211033	122211453	75673	90	110	33	-2.20727	4.22575	RAD21
chr12	122134958	122135360	chr12	122211633	122211753	76273	90	124	32	-2.38862	4.06163	RAD21
chr3	50473443	50473879	chr3	50579833	50580210	105954	50	60	5	-4.78749	2.02728	RAD21
chr6	33557458	33558239	chr6	33670233	33670383	111994	117	49	9	-4.25955	2.5592	RAD21
chr6	33557458	33558239	chr6	33667973	33668726	109734	117	116	25	-3.07801	3.65674	RAD21
chr6	33557458	33558239	chr6	33640641	33640914	82402	117	40	7	-4.55923	2.08055	RAD21
chr11	59305096	59305586	chr11	59448056	59448387	142470	58	67	5	-5.04626	1.96476	RAD21
chr1	207985294	207985513	chr1	208042398	208042681	56885	47	37	7	-3.56925	2.79746	RAD21
chr2	7006578	7006947	chr2	7058883	7059049	51936	65	45	7	-4.08923	2.28669	RAD21
chr2	7006578	7006947	chr2	7148022	7148414	141075	65	35	4	-4.95715	2.04271	RAD21
chr3	10385884	10386174	chr3	10745714	10745858	359540	30	18	3	-4.09434	3.25436	RAD21
chr12	95510928	95511205	chr12	95610981	95611647	99776	82	132	28	-2.62511	4.01514	RAD21
chr1	230768070	230768354	chr1	230907718	230907885	139364	32	38	3	-4.9061	2.08432	RAD21
chr18	54415928	54416308	chr18	55114402	55114562	698094	43	46	4	-4.81725	2.71321	RAD21
chr10	5484003	5484346	chr10	5648922	5649153	164576	63	22	4	-4.46159	2.5815	RAD21
chr2	11272746	11273299	chr2	11724285	11724730	450986	94	131	13	-4.28859	3.11564	RAD21
chr2	11272746	11273299	chr2	11722829	11723197	449530	94	107	12	-4.24631	3.15051	RAD21
chr12	69864011	69864264	chr12	69964511	69964888	100247	104	56	9	-4.27529	2.47065	RAD21
chr5	172143812	172144123	chr5	172359386	172359786	215263	112	98	8	-5.14458	2.11539	RAD21
chr17	1268669	1269099	chr17	1419814	1420166	150715	37	119	9	-3.99559	2.96853	RAD21
chr17	1268669	1269099	chr17	1419633	1419756	150534	37	109	10	-3.6971	3.24469	RAD21
chr8	95006963	95007175	chr8	95369384	95369798	362209	19	72	3	-5.02388	2.45554	RAD21
chr8	95006963	95007175	chr8	95369859	95370277	362684	19	91	3	-5.25807	2.25458	RAD21
chr8	95006963	95007175	chr8	95284639	95284844	277464	19	32	4	-3.63759	3.60199	RAD21
chr19	34992333	34992775	chr19	35203609	35204057	210834	50	69	6	-4.56261	2.62889	RAD21
chr17	79228772	79228933	chr17	79438531	79439394	209598	49	65	6	-4.48269	2.69806	RAD21
chr4	42283993	42284378	chr4	42521857	42522185	237479	24	34	4	-3.93183	3.26113	RAD21
chr14	33045389	33045652	chr14	34792245	34792474	1746593	20	36	3	-4.38203	2.96606	RAD21
chr14	33045389	33045652	chr14	34793504	34793987	1747852	20	48	3	-4.66971	2.74604	RAD21
chr5	136996101	136996324	chr5	137078794	137079047	82470	23	39	4	-4.02647	2.57887	RAD21
chr3	193499031	193499151	chr3	194060198	194060346	561047	152	18	3	-5.71703	1.95751	RAD21
chr3	193499031	193499151	chr3	194033173	194033982	534022	152	179	18	-4.43052	3.01779	RAD21
chr3	193499031	193499151	chr3	194032990	194033147	533839	152	141	17	-4.30621	3.12077	RAD21
chr2	231807126	231807315	chr2	231851907	231852266	44592	15	75	4	-4.25295	2.07889	RAD21
chr14	61763728	61763957	chr14	61929447	61929739	165490	14	74	3	-4.7459	2.32339	RAD21
chr14	61763728	61763957	chr14	61928362	61928828	164405	14	72	3	-4.7185	2.34457	RAD21
chr4	124024138	124024424	chr4	124581031	124581292	556607	36	40	3	-5.07517	2.48691	RAD21
chr1	249153099	249153393	chr1	249200143	249200954	46750	71	102	19	-2.99877	3.17415	RAD21
chr8	25434755	25435107	chr8	25946203	25946611	511096	31	58	5	-4.27555	3.14368	RAD21
chr1	244964518	244964902	chr1	245205911	245206436	241009	68	126	17	-3.38936	3.75424	RAD21
chr1	204415011	204415291	chr1	204472221	204472647	56930	75	158	14	-4.10197	2.31869	RAD21
chr1	204415011	204415291	chr1	204463578	204464024	48287	75	94	16	-3.31561	2.92348	RAD21
chr1	204415011	204415291	chr1	204463014	204463244	47723	75	79	16	-3.14176	3.06589	RAD21
chr22	38808854	38809149	chr22	38968112	38968422	158963	36	54	5	-4.35363	2.6609	RAD21
chr14	93153266	93153523	chr14	93250135	93250495	96612	16	51	4	-3.93183	2.76697	RAD21
chr19	45931585	45932121	chr19	45981501	45982835	49380	120	238	44	-2.69138	3.48182	RAD21
chr2	55998793	55999069	chr2	56188539	56188839	189470	33	37	5	-3.88855	3.18651	RAD21
chr2	55998793	55999069	chr2	56188339	56188496	189270	33	29	5	-3.64493	3.40787	RAD21
chr1	20491855	20492217	chr1	20756907	20757219	264690	48	39	3	-5.33754	2.06699	RAD21
chr7	91764030	91764257	chr7	92076501	92076858	312244	66	90	7	-4.79764	2.62661	RAD21
chr7	91764030	91764257	chr7	92077623	92077745	313366	66	107	7	-4.97066	2.47612	RAD21
chr6	27219077	27219382	chr6	27300649	27301358	81267	107	81	9	-4.67283	1.96681	RAD21
chr22	39930792	39931061	chr22	40420590	40421081	489529	80	71	6	-5.06119	2.48429	RAD21
chr4	169104872	169105220	chr4	169473219	169473478	367999	32	25	4	-3.91202	3.40926	RAD21
chr22	25348367	25348664	chr22	25444757	25444998	96093	34	43	8	-3.12868	3.51567	RAD21
chr12	7294731	7294947	chr12	7341092	7341360	46145	29	32	4	-4.06044	2.25729	RAD21
chr8	126130678	126131245	chr8	126517851	126518043	386606	143	36	5	-5.32749	2.20787	RAD21
chr12	57977021	57977503	chr12	58129695	58130146	152192	85	83	11	-4.0657	2.90744	RAD21
chr12	57977021	57977503	chr12	58026869	58027162	49366	85	65	10	-4.01187	2.33102	RAD21
chrX	48595602	48595722	chrX	48659650	48659808	63928	23	65	4	-4.53729	1.97692	RAD21
chr1	249120437	249121075	chr1	249200143	249200954	79068	70	102	10	-4.2683	2.32945	RAD21
chr14	90405854	90406051	chr14	90526685	90526972	120634	18	40	4	-3.80666	3.03296	RAD21
chr2	30387890	30388365	chr2	30929889	30930284	541524	66	75	11	-3.71135	3.61372	RAD21
chr1	91748317	91748697	chr1	91867572	91867869	118875	48	55	11	-3.08274	3.70448	RAD21
chr5	141391737	141391868	chr5	141521131	141521348	129263	39	40	4	-4.57985	2.35032	RAD21
chr5	142393657	142393995	chr5	143204720	143205098	810725	31	73	5	-4.50557	2.95838	RAD21
chr1	31191969	31192525	chr1	31252297	31252783	59772	190	190	71	-1.96869	4.28187	RAD21
chr3	121820487	121820735	chr3	122075336	122075732	254601	29	70	3	-5.41857	1.97214	RAD21
chr10	70764660	70765004	chr10	70852978	70853332	87974	90	104	18	-3.36346	3.23857	RAD21
chr5	149016291	149016774	chr5	149207822	149208308	191048	118	144	30	-2.9381	4.05618	RAD21
chr20	30619206	30619641	chr20	30679748	30680029	60107	66	48	6	-4.47734	2.00477	RAD21
chr2	220408609	220408729	chr2	220507209	220507536	98480	35	82	8	-3.80318	2.90086	RAD21
chr2	12307684	12308000	chr2	13146894	13147470	838894	57	82	4	-5.67718	2.01808	RAD21
chr12	26587280	26587654	chr12	26854506	26854891	266852	35	80	6	-4.35386	2.94659	RAD21
chr17	29761785	29761914	chr17	29852335	29852757	90421	29	115	7	-4.22041	2.45399	RAD21
chr11	2449529	2449745	chr11	2553952	2554509	104207	29	235	9	-4.43243	2.34993	RAD21
chr11	2449529	2449745	chr11	2552685	2552966	102940	29	174	9	-4.1319	2.62378	RAD21
chr18	23501580	23501890	chr18	23598015	23598177	96125	44	12	3	-4.07187	2.63236	RAD21
chr7	36513054	36513296	chr7	37221567	37221937	708271	63	48	4	-5.24175	2.36936	RAD21
chr20	49988883	49989261	chr20	50240747	50241155	251486	81	64	9	-4.15888	3.08914	RAD21
chr20	49988883	49989261	chr20	50211423	50211923	222162	81	89	7	-4.99127	2.27242	RAD21
chr14	75075624	75076059	chr14	75270995	75271245	194936	46	34	9	-2.96055	4.0448	RAD21
chr1	166853557	166853931	chr1	167028385	167028718	174454	40	90	9	-3.79424	3.22762	RAD21
chr1	166853557	166853931	chr1	167026559	167026774	172628	40	48	7	-3.66826	3.33739	RAD21
chr12	57341529	57341750	chr12	57395174	57395573	53424	25	150	8	-4.07063	2.31591	RAD21
chr2	217563592	217563858	chr2	217924218	217924388	360360	49	30	3	-5.09579	2.39349	RAD21
chr2	188364752	188365128	chr2	188446223	188446383	81095	86	107	23	-2.85619	3.66212	RAD21
chr7	105698186	105698355	chr7	105794257	105794643	95902	169	199	72	-1.86987	4.69336	RAD21
chr6	31364795	31364986	chr6	31409297	31409827	44311	52	112	15	-3.25364	2.91931	RAD21
chr6	31364795	31364986	chr6	31410354	31410585	45368	52	123	15	-3.34733	2.8556	RAD21
chr6	43422126	43422836	chr6	43474295	43474764	51459	77	94	12	-3.91729	2.4339	RAD21
chr6	37019065	37020038	chr6	37177970	37178698	157932	340	297	32	-4.59121	2.43838	RAD21
chr6	151335541	151335870	chr6	151645359	151645722	309489	46	71	4	-5.31873	2.16507	RAD21
chr11	13231968	13232210	chr11	13365699	13366040	133489	35	42	6	-3.7095	3.18437	RAD21
chr11	13231968	13232210	chr11	13356767	13357089	124557	35	25	4	-4.00164	2.87026	RAD21
chr10	106065395	106065625	chr10	106113260	106113458	47635	38	27	4	-4.16083	2.18543	RAD21
chr3	136265710	136265831	chr3	136471906	136472095	206075	53	107	9	-4.24867	2.90128	RAD21
chr7	31023281	31023558	chr7	31162284	31162578	138726	55	32	5	-4.25419	2.69077	RAD21
chr11	120042995	120043283	chr11	120100575	120100901	57292	57	56	19	-2.17953	4.05367	RAD21
chr11	134230209	134230670	chr11	134597314	134597511	366644	33	14	3	-3.93834	3.38679	RAD21
chr10	76498700	76498986	chr10	76779176	76779470	280190	39	51	5	-4.37651	2.95135	RAD21
chr11	36310963	36311163	chr11	36500293	36500572	189130	18	64	4	-4.27667	2.83196	RAD21
chr2	188364752	188365128	chr2	188445979	188446104	80851	86	94	22	-2.81556	3.69824	RAD21
chr21	43032825	43033204	chr21	43198457	43198649	165253	55	30	4	-4.63594	2.42361	RAD21
chr2	231712700	231712950	chr2	231778075	231778416	65125	21	46	5	-3.65429	2.79773	RAD21
chr8	70854669	70854969	chr8	71446551	71447187	591582	29	121	5	-4.94421	2.59915	RAD21
chr1	160398269	160399012	chr1	160576714	160577288	177702	148	140	51	-2.0752	4.81043	RAD21
chr3	107872288	107872569	chr3	108196491	108196727	323922	34	30	3	-4.73033	2.69854	RAD21
chr4	140020536	140020900	chr4	140097476	140097612	76576	84	39	6	-4.51086	2.08615	RAD21
chr4	140020536	140020900	chr4	140088913	140089390	68013	84	44	7	-4.32319	2.20212	RAD21
chr12	109059230	109059361	chr12	109197115	109197734	137754	169	136	34	-2.98983	3.86926	RAD21
chr19	14616295	14616675	chr19	14661120	14661330	44445	30	48	5	-4.05352	2.24596	RAD21
chr19	14616295	14616675	chr19	14662226	14662525	45551	30	57	5	-4.22537	2.11094	RAD21
chr21	47390631	47390851	chr21	47517827	47518065	126976	36	29	5	-3.73194	3.13578	RAD21
chr13	114909311	114909455	chr13	114992098	114992510	82643	17	65	4	-4.23501	2.38518	RAD21
chr14	103572105	103572301	chr14	103651800	103651978	79499	67	18	4	-4.32248	2.28188	RAD21
chr11	116765850	116766195	chr11	116969077	116969536	202882	28	84	10	-3.15785	3.88203	RAD21
chr11	116765850	116766195	chr11	116976720	116977049	210525	28	61	7	-3.55126	3.54153	RAD21
chr2	86054599	86055001	chr2	86307037	86307308	252036	95	125	25	-2.94444	4.17417	RAD21
chr8	95959395	95959576	chr8	96036676	96037385	77100	29	148	8	-4.20563	2.37427	RAD21
chr1	91186936	91187401	chr1	91430038	91430332	242637	49	50	5	-4.58497	2.68855	RAD21
chr1	179783766	179784322	chr1	180147885	180148331	363563	83	83	5	-5.61881	1.94528	RAD21
chr20	52329964	52330191	chr20	52486148	52486909	155957	14	67	3	-4.64653	2.38102	RAD21
chr10	72685348	72685835	chr10	73044781	73045125	358946	64	41	5	-4.65358	2.7736	RAD21
chr14	64810871	64811200	chr14	64945434	64945838	134234	35	35	5	-3.89182	3.01599	RAD21
chr4	88769889	88770024	chr4	88894799	88895035	124775	23	24	3	-4.11632	2.76358	RAD21
chr11	117939261	117939764	chr11	118042299	118042733	102535	59	81	11	-3.6762	3.04884	RAD21
chr11	117939261	117939764	chr11	118016039	118016506	76275	59	108	8	-4.60079	2.0003	RAD21
chr11	2721242	2721434	chr11	2906251	2906508	184817	32	114	5	-4.98306	2.17412	RAD21
chr9	5450376	5450831	chr9	5589885	5590513	139054	57	69	12	-3.30734	3.57558	RAD21
chr9	5450376	5450831	chr9	5600565	5600798	149734	57	28	4	-4.60267	2.403	RAD21
chr2	241172917	241173037	chr2	241377738	241378034	204701	42	47	16	-2.04264	4.89511	RAD21
chr16	11065321	11066442	chr16	11349528	11349776	283086	124	162	20	-3.91641	3.36409	RAD21
chr16	11065321	11066442	chr16	11351133	11351415	284691	124	143	21	-3.69408	3.56358	RAD21
chr16	11065321	11066442	chr16	11450575	11450864	384133	124	63	6	-5.3799	2.16192	RAD21
chr6	7276056	7276533	chr6	7389599	7390179	113066	87	61	10	-3.97161	2.83617	RAD21
chr6	7276056	7276533	chr6	7390431	7390623	113898	87	76	10	-4.19147	2.63412	RAD21
chr6	7276056	7276533	chr6	7615763	7616135	339230	87	85	16	-3.36338	3.89578	RAD21
chr6	7276056	7276533	chr6	7616282	7616501	339749	87	106	16	-3.58417	3.70376	RAD21
chr8	110359087	110359533	chr8	110564237	110564453	204704	85	30	7	-3.95203	3.16662	RAD21
chr10	5082507	5082706	chr10	5136835	5137152	54129	18	41	3	-4.40672	2.02301	RAD21
chr9	74653957	74654244	chr9	74886839	74887149	232595	34	31	6	-3.37683	3.7476	RAD21
chr18	60090444	60090601	chr18	60251525	60251917	160924	22	66	3	-5.08347	1.99547	RAD21
chr18	11655384	11655713	chr18	11728368	11728517	72655	53	10	3	-4.07565	2.46389	RAD21
chr7	51255776	51255960	chr7	51434794	51435097	178834	8	39	4	-2.97041	3.9944	RAD21
chr16	77709663	77710074	chr16	78005317	78005815	295243	63	59	20	-2.22921	4.87143	RAD21
chr1	110596456	110596919	chr1	110648679	110649077	51760	50	55	11	-3.12357	3.13633	RAD21
chr1	110596456	110596919	chr1	110659144	110659355	62225	50	24	7	-3.19826	3.19051	RAD21
chr3	157583161	157583513	chr3	158249976	158250180	666463	35	31	3	-4.79211	2.73156	RAD21
chr3	157583161	157583513	chr3	158151904	158152233	568391	35	42	3	-5.09579	2.47138	RAD21
chr3	157583161	157583513	chr3	158152261	158152673	568748	35	50	3	-5.27015	2.32761	RAD21
chr7	77287069	77287609	chr7	77388576	77389050	100967	41	109	9	-4.01047	2.72416	RAD21
chr4	110354661	110354931	chr4	110495546	110495836	140615	34	44	4	-4.53796	2.43189	RAD21
chr3	179041049	179041260	chr3	179276586	179276921	235326	94	47	10	-3.78827	3.38486	RAD21
chr1	39602283	39602646	chr1	39649896	39650454	47250	52	136	16	-3.31872	2.90663	RAD21
chr1	39602283	39602646	chr1	39651285	39651505	48639	52	117	11	-3.91763	2.40572	RAD21
chr1	39602283	39602646	chr1	39649398	39649765	46752	52	105	13	-3.47531	2.76535	RAD21
chr15	41234053	41234393	chr15	41477127	41477447	242734	39	51	3	-5.39816	1.96164	RAD21
chr17	55935744	55935999	chr17	56071679	56071799	135680	78	65	12	-3.56128	3.32986	RAD21
chr17	55935744	55935999	chr17	56072853	56073093	136854	78	73	11	-3.85138	3.06174	RAD21
chr17	55935744	55935999	chr17	56076953	56077117	140954	78	65	8	-4.37221	2.58748	RAD21
chr21	35815867	35816168	chr21	36002819	36003245	186651	47	115	7	-4.70326	2.43541	RAD21
chr8	11622956	11623414	chr8	11799836	11800061	176422	97	70	7	-4.93139	2.19258	RAD21
chr7	37026721	37027054	chr7	37238533	37238784	211479	23	32	3	-4.40401	2.77368	RAD21
chr7	37026721	37027054	chr7	37241249	37241512	214195	23	39	5	-3.58018	3.52339	RAD21
chr7	37026721	37027054	chr7	37221567	37221937	194513	23	48	5	-3.78782	3.2918	RAD21
chr17	7184713	7185038	chr17	7249248	7249552	64210	110	35	11	-3.46004	2.96874	RAD21
chr1	51807628	51807946	chr1	52000000	52000132	192054	32	48	3	-5.13971	2.05516	RAD21
chr17	4812395	4812682	chr17	4860091	4860211	47409	30	15	4	-3.33666	2.89338	RAD21
chr17	30677032	30677237	chr17	30771240	30771533	94003	25	43	5	-3.7612	2.90865	RAD21
chr19	46532164	46532513	chr19	46768431	46768798	235918	48	95	7	-4.53326	2.71887	RAD21
chr19	46532164	46532513	chr19	46581910	46582037	49397	48	102	11	-3.70038	2.60277	RAD21
chr9	3467430	3468037	chr9	3647754	3647929	179717	70	18	6	-3.55535	3.462	RAD21
chr11	119884024	119884291	chr11	119978872	119979291	94581	21	57	4	-4.31498	2.39412	RAD21
chr17	76493174	76493585	chr17	76705552	76705674	211967	69	80	11	-3.82034	3.30171	RAD21
chr17	38170994	38171114	chr17	38267791	38268327	96677	113	246	20	-4.24125	2.47752	RAD21
chr6	44235718	44236088	chr6	44306195	44306677	70107	81	98	19	-3.09054	3.35842	RAD21
chr2	9346703	9346985	chr2	9473797	9474032	126812	88	49	7	-4.47734	2.43465	RAD21
chr17	75328390	75328616	chr17	75490909	75491396	162293	118	123	18	-3.80213	3.18039	RAD21
chr12	93963912	93964372	chr12	94135989	94136656	171617	230	169	41	-3.14083	3.81799	RAD21
chr12	93963912	93964372	chr12	94136685	94136904	172313	230	178	41	-3.19272	3.77248	RAD21
chr1	48575101	48575452	chr1	48669115	48669268	93663	33	41	4	-4.43749	2.2733	RAD21
chr1	48575101	48575452	chr1	48702601	48702821	127149	33	27	3	-4.59512	2.32568	RAD21
chr5	5497304	5497647	chr5	5699276	5699485	201629	67	25	8	-3.26469	3.78273	RAD21
chr7	26726078	26726440	chr7	27176041	27176327	449601	44	59	4	-5.08914	2.44315	RAD21
chr3	48315183	48315544	chr3	48477266	48477790	161722	83	132	18	-3.5209	3.43745	RAD21
chr10	124058361	124058631	chr10	124194829	124195168	136198	13	22	5	-2.43712	4.38296	RAD21
chr10	104512973	104513249	chr10	104661242	104661564	147993	23	28	3	-4.27047	2.70587	RAD21
chr19	6769320	6769530	chr19	6862765	6863179	93235	34	159	7	-4.70344	2.02149	RAD21
chr9	35116572	35117114	chr9	35258850	35259144	141736	113	28	13	-2.92969	3.93373	RAD21
chr12	25144474	25144872	chr12	25540272	25540943	395400	48	95	6	-4.84156	2.62477	RAD21
chr4	95254457	95254673	chr4	95312029	95312249	57356	42	40	10	-2.82138	3.47631	RAD21
chr12	38532613	38532875	chr12	38710277	38710441	177402	20	12	3	-3.28341	3.70405	RAD21
chr5	158122493	158122917	chr5	158560111	158560552	437194	53	45	3	-5.57973	2.02365	RAD21
chr8	101692824	101693691	chr8	101839133	101839682	145442	93	99	12	-4.15791	2.80205	RAD21
chr3	87347361	87347566	chr3	88054284	88054489	706718	24	35	5	-3.51453	3.77048	RAD21
chr3	87347361	87347566	chr3	88052294	88052760	704728	24	43	3	-4.74203	2.77457	RAD21
chr3	38180057	38180189	chr3	38495172	38495392	314983	53	40	3	-5.46195	2.04711	RAD21
chr14	59974139	59974409	chr14	60043440	60043684	69031	20	28	3	-4.13071	2.38718	RAD21
chr15	40345454	40345837	chr15	40398695	40398992	52858	36	122	10	-3.78237	2.56622	RAD21
chr7	105817063	105817943	chr7	106102623	106103377	284680	302	293	33	-4.39758	2.94047	RAD21
chr6	24856273	24856641	chr6	25070934	25071389	214293	70	57	8	-4.13266	3.02533	RAD21
chr12	104775537	104776197	chr12	105270756	105271287	494559	103	68	13	-3.72434	3.60013	RAD21
chr12	104775537	104776197	chr12	105219121	105219241	442924	103	31	5	-4.84984	2.64055	RAD21
chr5	78430069	78430191	chr5	78496322	78496722	66131	113	32	7	-4.3013	2.2093	RAD21
chr1	46502468	46503072	chr1	46645838	46646199	142766	243	223	80	-2.13618	4.67484	RAD21
chr1	46502468	46503072	chr1	46645112	46645540	142040	243	283	83	-2.30083	4.52012	RAD21
chr1	46502468	46503072	chr1	46689207	46689619	186135	243	54	11	-4.68625	2.44925	RAD21
chr8	98607985	98608433	chr8	98656133	98656286	47700	47	44	8	-3.47545	2.77756	RAD21
chr6	106181384	106181790	chr6	106533985	106534291	352195	48	130	6	-5.15522	2.34143	RAD21
chr6	106181384	106181790	chr6	106283261	106283554	101471	48	31	5	-4.08631	2.65651	RAD21
chr9	117501180	117501567	chr9	117776332	117776646	274765	36	53	4	-4.78122	2.58217	RAD21
chr4	77965720	77965967	chr4	78124676	78125139	158709	44	112	6	-4.91917	2.13859	RAD21
chr1	9935890	9936196	chr1	10003261	10003630	67065	175	160	46	-2.58268	3.80224	RAD21
chr1	9935890	9936196	chr1	10002340	10003210	66144	175	134	49	-2.27899	4.07373	RAD21
chr1	9935890	9936196	chr1	10092531	10093072	156335	175	87	11	-4.8349	2.20828	RAD21
chr17	55321013	55321134	chr17	55518094	55518468	196960	162	36	9	-4.27667	2.85386	RAD21
chr11	62162237	62162763	chr11	62327983	62328499	165220	160	82	17	-3.81547	3.17798	RAD21
chr11	62162237	62162763	chr11	62310181	62310888	147418	160	117	12	-4.86753	2.14964	RAD21
chr6	41336579	41337016	chr6	41651306	41651601	314290	120	185	26	-3.49165	3.77525	RAD21
chr12	53297871	53298008	chr12	53346026	53346417	48018	88	50	10	-3.78419	2.51465	RAD21
chr12	53297871	53298008	chr12	53369211	53369348	71203	88	50	7	-4.49754	2.06219	RAD21
chr12	53297871	53298008	chr12	53343666	53343834	45658	88	40	9	-3.77177	2.49825	RAD21
chr12	53297871	53298008	chr12	53344956	53345123	46948	88	70	14	-3.44772	2.79162	RAD21
chr20	21029542	21029744	chr20	21486959	21487190	457215	22	107	4	-4.99128	2.52913	RAD21
chr20	21029542	21029744	chr20	21485881	21486229	456137	22	97	3	-5.46853	2.12844	RAD21
chr18	11655384	11655713	chr18	11741603	11741787	85890	53	16	3	-4.54566	2.11722	RAD21
chr20	43951517	43952066	chr20	44115848	44116004	163782	104	14	3	-5.08622	2.00392	RAD21
chr12	52557785	52558011	chr12	52607362	52607569	49351	25	14	4	-3.08534	3.13812	RAD21
chr8	6281495	6281864	chr8	6429876	6430029	148012	86	40	5	-4.92435	2.09895	RAD21
chr8	86363798	86364108	chr8	87045388	87045739	681280	42	45	3	-5.34711	2.28114	RAD21
chr11	73189835	73190133	chr11	73371928	73372509	181795	31	155	11	-3.68162	3.35276	RAD21
chr11	73189835	73190133	chr11	73371529	73371656	181396	31	127	10	-3.673	3.35944	RAD21
chr21	43032518	43032638	chr21	43198457	43198649	165819	47	30	3	-5.05412	2.04124	RAD21
chr1	201405709	201405868	chr1	201449405	201449665	43537	45	63	7	-4.05798	2.23294	RAD21
chr3	17472493	17472800	chr3	17728164	17728399	255364	54	37	3	-5.40268	1.98808	RAD21
chr2	120275107	120275369	chr2	120417646	120418046	142277	31	48	5	-4.08631	2.85795	RAD21
chr6	111136200	111136360	chr6	111200408	111200665	64048	59	50	6	-4.40604	2.09831	RAD21
chr12	118558529	118559161	chr12	118813415	118813579	254254	67	191	20	-3.4655	3.71361	RAD21
chr12	118558529	118559161	chr12	118813229	118813387	254068	67	176	20	-3.38371	3.7862	RAD21
chr8	66556809	66557075	chr8	66618043	66618243	60968	36	64	11	-2.94661	3.40712	RAD21
chr8	66556809	66557075	chr8	66618318	66618625	61243	36	71	11	-3.05041	3.31546	RAD21
chr11	10586310	10586695	chr11	10675838	10676186	89143	37	55	7	-3.72643	2.90721	RAD21
chr3	14246188	14246349	chr3	14503274	14503559	256925	274	76	11	-5.14807	2.21868	RAD21
chr11	68400313	68400693	chr11	68856019	68856522	455326	35	79	4	-5.15221	2.39325	RAD21
chr18	52226256	52226540	chr18	52650271	52650638	423731	15	28	4	-3.26767	3.96359	RAD21
chr18	52226256	52226540	chr18	52314558	52314697	88018	15	9	3	-2.70805	3.8523	RAD21
chr14	50328802	50329238	chr14	50470100	50470457	140862	79	47	5	-5.00072	2.00134	RAD21
chr2	175330185	175330328	chr2	175411377	175411503	81049	36	62	6	-4.12713	2.47492	RAD21
chr2	175330185	175330328	chr2	175411554	175412120	81226	36	76	6	-4.33073	2.28603	RAD21
chr7	91763745	91764010	chr7	92077623	92077745	313613	71	107	7	-5.04369	2.41233	RAD21
chr7	91763745	91764010	chr7	92076501	92076858	312491	71	90	7	-4.87067	2.5628	RAD21
chr3	37896915	37897327	chr3	37953622	37953811	56295	93	17	5	-4.14694	2.27275	RAD21
chr7	50269648	50269848	chr7	50436749	50437734	166901	21	144	6	-4.43082	2.61815	RAD21
chr15	78469672	78470205	chr15	78534576	78534708	64371	35	84	10	-3.38099	3.04278	RAD21
chr15	78469672	78470205	chr15	78533309	78533606	63104	35	73	10	-3.24064	3.16016	RAD21
chr14	96763422	96763619	chr14	96890694	96891076	127075	13	48	3	-4.23893	2.65995	RAD21
chr11	61984708	61984997	chr11	62078559	62078919	93562	32	38	4	-4.33073	2.37254	RAD21
chr9	96444512	96444852	chr9	96725258	96725553	280406	52	65	6	-4.54211	2.80492	RAD21
chr5	32489751	32490227	chr5	32613113	32613606	122886	50	89	11	-3.60487	3.23462	RAD21
chr1	26946566	26947208	chr1	27003796	27004434	56588	183	162	25	-3.85933	2.53368	RAD21
chr15	56543724	56543958	chr15	56721013	56721411	177055	32	87	6	-4.34813	2.72859	RAD21
chr17	10640473	10640683	chr17	10748467	10748790	107784	18	35	6	-2.8622	3.84756	RAD21
chr6	49614030	49614249	chr6	49703952	49704261	89703	58	50	5	-4.75359	1.94989	RAD21
chr21	37792282	37792631	chr21	37961722	37961962	169091	71	45	7	-4.17752	2.85849	RAD21
chr10	34811585	34811783	chr10	34926485	34926676	114702	17	39	10	-1.8916	4.80212	RAD21
chr6	2999466	2999716	chr6	3053735	3054218	54019	117	83	13	-4.05112	2.33845	RAD21
chr20	57056517	57056982	chr20	57225574	57225786	168592	60	70	7	-4.45102	2.6056	RAD21
chr20	57056517	57056982	chr20	57225816	57226404	168834	60	91	7	-4.71338	2.36555	RAD21
chr20	57056517	57056982	chr20	57414541	57414752	357559	60	22	3	-4.98816	2.48578	RAD21
chr20	57056517	57056982	chr20	57427810	57428004	370828	60	14	3	-4.53618	2.87545	RAD21
chr7	150053597	150054090	chr7	150118053	150118548	63963	97	116	12	-4.35849	2.14139	RAD21
chr3	127293844	127294163	chr3	127371013	127371299	76850	23	31	3	-4.37226	2.21721	RAD21
chr8	62157079	62157204	chr8	62475645	62476115	318441	32	46	6	-3.71086	3.58636	RAD21
chr18	741885	742322	chr18	830437	831197	88115	100	102	24	-2.87404	3.69764	RAD21
chr11	94356261	94356850	chr11	94630357	94630747	273507	108	47	14	-3.25416	3.93574	RAD21
chr12	14999227	14999347	chr12	15139536	15139700	140189	36	14	5	-3.0037	3.86138	RAD21
chr6	158177688	158178166	chr6	158294747	158295195	116581	68	79	10	-3.98379	2.84447	RAD21
chr15	65481422	65482039	chr15	65563194	65563594	81155	104	78	21	-2.91205	3.6104	RAD21
chr15	65481422	65482039	chr15	65590007	65590398	107968	104	60	11	-3.94294	2.83303	RAD21
chr15	65481422	65482039	chr15	65588132	65588277	106093	104	18	4	-4.76217	2.05191	RAD21
chr13	20664603	20664870	chr13	20737429	20737806	72559	28	27	8	-2.46916	3.95561	RAD21
chr2	201577733	201578068	chr2	201677170	201677325	99102	60	51	5	-4.80729	1.96375	RAD21
chr7	24861081	24861239	chr7	25133840	25134216	272601	112	119	18	-3.71688	3.52326	RAD21
chr3	119963138	119963379	chr3	120136086	120136503	172707	19	49	7	-2.94444	4.00128	RAD21
chr1	229693879	229694072	chr1	229760840	229760979	66768	66	55	10	-3.59182	2.86839	RAD21
chr1	229693879	229694072	chr1	229761825	229762029	67753	66	74	13	-3.36382	3.08671	RAD21
chr11	58938775	58939302	chr11	59052110	59052315	112808	46	22	4	-4.1471	2.66964	RAD21
chr11	58938775	58939302	chr11	59197466	59197752	258164	46	31	3	-5.0654	2.29514	RAD21
chr11	45361645	45361892	chr11	45792857	45793105	430965	30	129	10	-3.65584	3.63918	RAD21
chr11	45361645	45361892	chr11	45793140	45793907	431248	30	162	10	-3.88362	3.44753	RAD21
chr6	111003526	111003991	chr6	111270975	111271302	266984	64	34	4	-4.91265	2.44982	RAD21
chr15	99813217	99813447	chr15	100243941	100244261	430494	31	74	5	-4.51918	2.9121	RAD21
chr16	55978229	55978754	chr16	56237007	56237358	258253	45	29	5	-3.95508	3.28502	RAD21
chr1	114889015	114889552	chr1	114970573	114971165	81021	120	55	23	-2.52384	3.97193	RAD21
chr10	63798371	63798848	chr10	64008441	64008561	209593	81	28	4	-4.95406	2.27217	RAD21
chr4	54774860	54775143	chr4	55099522	55099728	324379	52	59	11	-3.23299	4.00836	RAD21
chr4	54774860	54775143	chr4	55083871	55084388	308728	52	50	7	-3.97145	3.3485	RAD21
chr20	4089106	4089276	chr20	4176212	4176582	86936	108	62	8	-4.65038	2.02666	RAD21
chr17	6949101	6949525	chr17	7039613	7039839	90088	46	39	4	-4.71961	1.98444	RAD21
chr13	50571380	50571874	chr13	50656815	50656936	84941	45	40	4	-4.72295	1.94467	RAD21
chr17	77813586	77813854	chr17	77898195	77898479	84341	42	22	3	-4.63149	2.02608	RAD21
chr11	16841844	16842123	chr11	17084983	17085365	242860	39	49	3	-5.35816	1.99774	RAD21
chr11	122982172	122982511	chr11	123117906	123118207	135395	27	28	6	-3.04452	3.8128	RAD21
chr9	116353887	116354271	chr9	116417529	116418113	63258	84	174	24	-3.23376	3.16791	RAD21
chr1	840032	840341	chr1	911435	911795	71094	43	36	6	-3.7612	2.74439	RAD21
chr6	797545	797839	chr6	1382019	1382309	584180	38	39	5	-4.08227	3.30772	RAD21
chr1	203578587	203579090	chr1	203670699	203671857	91609	73	282	24	-3.57626	3.06516	RAD21
chr10	103362381	103363148	chr10	103540858	103541192	177710	136	108	47	-1.89449	4.97581	RAD21
chr8	130951770	130952288	chr8	131027452	131027682	75164	72	66	7	-4.5745	2.01727	RAD21
chr21	40105851	40106224	chr21	40509205	40509405	402981	81	109	13	-3.9559	3.37782	RAD21
chrX	3569602	3569722	chrX	3730084	3730349	160362	20	26	4	-3.48124	3.46957	RAD21
chr7	50244954	50245372	chr7	50485782	50486202	240410	79	68	5	-5.37008	1.98089	RAD21
chr9	32384426	32384652	chr9	32526265	32526739	141613	35	29	3	-4.72542	2.26051	RAD21
chr9	32384426	32384652	chr9	32572169	32572681	187517	35	63	6	-4.11496	2.97448	RAD21
chr9	32384426	32384652	chr9	32573020	32573245	188368	35	72	6	-4.2485	2.85533	RAD21
chr8	37395805	37395983	chr8	37557848	37558122	161865	16	49	4	-3.89182	3.09636	RAD21
chrX	68047578	68048070	chrX	68505804	68506111	457734	38	27	5	-3.71455	3.59962	RAD21
chr5	78320791	78321245	chr5	78430069	78430191	108824	53	113	7	-4.80586	2.02711	RAD21
chr4	79873101	79873492	chr4	80497668	80497915	624176	63	33	3	-5.44242	2.1952	RAD21
chr1	64157660	64158083	chr1	64602810	64603074	444727	18	30	3	-4.09434	3.27606	RAD21
chr4	110926644	110927053	chr4	111432135	111432432	505082	77	61	5	-5.2358	2.34387	RAD21
chr4	110926644	110927053	chr4	111437606	111437791	510553	77	36	4	-5.15474	2.41279	RAD21
chr2	112645347	112645708	chr2	112806021	112806152	160313	56	98	18	-2.82958	4.06986	RAD21
chr4	110926644	110927053	chr4	111430083	111430285	503030	77	60	11	-3.64236	3.66935	RAD21
chr7	45119935	45120117	chr7	45175642	45176157	55525	21	131	6	-4.3362	2.09677	RAD21
chr1	64081584	64081940	chr1	64712049	64712321	630109	27	42	6	-3.44999	3.82639	RAD21
chr1	64081584	64081940	chr1	64708744	64708965	626804	27	27	3	-4.39445	3.05343	RAD21
chr11	86343904	86344081	chr11	86460526	86460810	116445	25	37	3	-4.63257	2.23338	RAD21
chr7	23317088	23317379	chr7	23584397	23584856	267018	62	101	10	-4.13708	3.13971	RAD21
chr3	128880157	128880691	chr3	128964471	128964907	83780	69	87	16	-3.15484	3.40319	RAD21
chr1	89948425	89948750	chr1	90016496	90016815	67746	75	50	7	-4.33769	2.18688	RAD21
chr1	89948425	89948750	chr1	90064551	90064940	115801	75	85	13	-3.63024	3.17276	RAD21
chr9	136658181	136658475	chr9	136859423	136859873	200948	46	91	7	-4.44768	2.70875	RAD21
chr15	76440344	76440643	chr15	77159135	77159409	718492	37	38	3	-5.05128	2.52442	RAD21
chr8	144594793	144595133	chr8	144650954	144651231	55821	44	64	6	-4.35955	2.07821	RAD21
chr3	33924981	33925346	chr3	34725423	34725640	800077	106	30	4	-5.29205	2.32939	RAD21
chr3	33924981	33925346	chr3	34302105	34302404	376759	106	22	3	-5.55726	2.00609	RAD21
chr3	33924981	33925346	chr3	34052857	34053035	127511	106	43	7	-4.53282	2.38601	RAD21
chr3	33924981	33925346	chr3	34057044	34057279	131698	106	61	15	-3.35821	3.50743	RAD21
chr12	7167693	7168125	chr12	7244997	7245353	76872	68	63	13	-3.23274	3.27953	RAD21
chr2	27321476	27321779	chr2	27414229	27414787	92450	110	66	9	-4.49569	2.21058	RAD21
chr2	27321476	27321779	chr2	27514710	27515165	192931	110	53	7	-4.77895	2.38609	RAD21
chr2	27321476	27321779	chr2	27502812	27503380	181033	110	75	7	-5.12615	2.03044	RAD21
chr6	10031245	10031518	chr6	10435802	10436100	404284	22	79	3	-5.26327	2.27079	RAD21
chr6	10031245	10031518	chr6	10435246	10435552	403728	22	65	3	-5.06821	2.43576	RAD21
chr10	73079321	73079589	chr10	73138733	73138873	59144	105	35	7	-4.31749	2.14257	RAD21
chr1	145421512	145422170	chr1	145541413	145541533	119243	65	79	12	-3.57402	3.24433	RAD21
chr3	50159036	50159373	chr3	50226686	50227016	67313	66	62	16	-2.77161	3.63002	RAD21
chrX	68042479	68042880	chrX	68607456	68607713	564576	42	30	5	-3.91999	3.44129	RAD21
chr10	50374084	50374264	chr10	50508387	50508901	134123	61	86	6	-4.9817	1.99451	RAD21
chr2	27976876	27977311	chr2	28642217	28642535	664906	130	28	4	-5.42715	2.2139	RAD21
chr6	11585646	11586106	chr6	12289605	12289892	703499	55	65	5	-4.96284	2.59532	RAD21
chr6	11585646	11586106	chr6	12603715	12603911	1017609	55	35	3	-5.36546	2.2405	RAD21
chr6	11585646	11586106	chr6	12605990	12606409	1019884	55	57	6	-4.46687	2.94168	RAD21
chr15	99826683	99827027	chr15	100296069	100296406	469042	34	36	3	-4.91265	2.6004	RAD21
chr1	237031939	237032598	chr1	237119983	237120121	87385	65	22	4	-4.49284	2.17732	RAD21
chr18	666237	666479	chr18	839376	839827	172897	17	91	3	-5.14685	1.98268	RAD21
chr12	3244668	3245052	chr12	3384584	3384879	139532	19	18	3	-3.63759	3.26853	RAD21
chr12	104775537	104776197	chr12	104850379	104850884	74182	103	107	11	-4.51177	2.06902	RAD21
chr1	226069850	226070322	chr1	226149957	226150540	79635	86	88	15	-3.51558	3.03586	RAD21
chr15	99813217	99813447	chr15	100244489	100244884	431042	31	85	5	-4.65776	2.79572	RAD21
chr1	212244025	212244635	chr1	212628977	212629681	384342	97	174	12	-4.76395	2.68673	RAD21
chr1	6498118	6498373	chr1	17036307	17036658	10537934	40	116	4	-5.66988	2.08434	RAD21
chrX	9963827	9964122	chrX	10087466	10087938	123344	39	136	18	-2.79547	3.99797	RAD21
chr18	55298238	55298358	chr18	55501009	55501195	202651	51	19	3	-4.67904	2.50333	RAD21
chr10	76025706	76026068	chr10	76859442	76860130	833374	56	103	5	-5.4412	2.20696	RAD21
chr1	241694662	241695111	chr1	242181003	242181226	485892	64	32	3	-5.42739	2.17732	RAD21
chr6	151213093	151213518	chr6	151656044	151656404	442526	50	40	4	-4.82831	2.65843	RAD21
chr6	151213093	151213518	chr6	151645359	151645722	431841	50	71	4	-5.40211	2.16958	RAD21
chr11	46404841	46404997	chr11	46550851	46551281	145854	22	49	4	-4.21027	2.75482	RAD21
chr7	4652604	4652836	chr7	4793543	4793813	140707	45	52	5	-4.53903	2.43119	RAD21
chr9	91208773	91209118	chr9	91356343	91356624	147225	37	30	3	-4.81489	2.19786	RAD21
chr6	56767787	56767982	chr6	56819936	56820307	51954	44	72	11	-3.26507	3.01386	RAD21
chr6	56767787	56767982	chr6	56820735	56820938	52753	44	79	10	-3.54847	2.77221	RAD21
chr14	69378264	69378725	chr14	69523000	69523346	144275	52	35	5	-4.28772	2.67714	RAD21
chr14	69378264	69378725	chr14	69557042	69557230	178317	52	24	4	-4.35671	2.72481	RAD21
chr20	39597389	39597745	chr20	39968407	39969597	370662	77	207	11	-4.88073	2.5806	RAD21
chr20	39597389	39597745	chr20	39878322	39878961	280577	77	78	5	-5.48164	1.97229	RAD21
chr20	39597389	39597745	chr20	39861065	39861233	263320	77	48	4	-5.44242	1.97064	RAD21
chr20	39597389	39597745	chr20	39860546	39860666	262801	77	42	4	-5.30889	2.08839	RAD21
chr17	2273159	2273286	chr17	2319195	2319315	45909	16	30	6	-2.59027	3.50919	RAD21
chr17	2273159	2273286	chr17	2319363	2319774	46077	16	42	6	-2.92674	3.22489	RAD21
chr1	207108833	207109135	chr1	207152808	207153031	43673	60	92	12	-3.64632	2.57991	RAD21
chr15	79422988	79423135	chr15	79476450	79476621	53315	10	78	3	-4.46207	1.96778	RAD21
chr1	28573737	28574329	chr1	28696081	28696376	121752	127	55	7	-4.9597	1.95462	RAD21
chr22	26875074	26875250	chr22	27041148	27041601	165898	19	67	3	-4.95191	2.13551	RAD21
chr18	45550270	45550415	chr18	45972384	45972553	421969	54	42	3	-5.52943	2.05563	RAD21
chr3	196983689	196984068	chr3	197180856	197181181	196788	65	50	6	-4.50289	2.64795	RAD21
chr19	51111213	51111840	chr19	51161336	51161620	49496	103	77	11	-4.18274	2.18328	RAD21
chr5	177502814	177503522	chr5	177573028	177573290	69506	173	47	11	-4.20765	2.31929	RAD21
chr15	57632778	57633376	chr15	57819695	57820132	186319	63	67	12	-3.37801	3.64295	RAD21
chr10	15503295	15503750	chr10	15757818	15758271	254068	57	89	9	-4.13724	3.11397	RAD21
chr3	37595942	37596211	chr3	37820971	37821469	224760	57	84	10	-3.8687	3.2883	RAD21
chr3	128399517	128400234	chr3	128513321	128513770	113087	80	79	14	-3.47336	3.30492	RAD21
chr5	78195695	78195977	chr5	78260597	78261028	64620	41	55	6	-4.13739	2.34936	RAD21
chr1	24136256	24136653	chr1	24243218	24243605	106565	122	116	15	-4.14151	2.63791	RAD21
chr12	6723458	6723581	chr12	6772399	6772623	48818	36	35	4	-4.36628	2.0178	RAD21
chr2	218653960	218654248	chr2	218787460	218787592	133212	51	11	3	-4.1325	2.78691	RAD21
chr2	178976902	178977287	chr2	179283980	179284146	306693	76	39	6	-4.41078	2.95977	RAD21
chr2	178976902	178977287	chr2	179279271	179279770	301984	76	103	7	-5.07364	2.36974	RAD21
chr12	53299220	53299367	chr12	53344956	53345123	45589	109	70	13	-3.80994	2.46494	RAD21
chr1	11730840	11730975	chr1	11779618	11780312	48643	25	127	7	-4.17124	2.18565	RAD21
chr18	42258866	42259168	chr18	42475409	42475834	216241	18	14	5	-2.31055	4.67232	RAD21
chr1	109820036	109820475	chr1	109941917	109942380	121442	77	171	19	-3.59659	3.23483	RAD21
chr1	109820036	109820475	chr1	109940767	109940971	120292	77	154	19	-3.49188	3.3272	RAD21
chr20	36685862	36686353	chr20	36793571	36793986	107218	88	71	8	-4.58113	2.22878	RAD21
chr20	36685862	36686353	chr20	36851042	36851368	164689	88	153	16	-3.9626	3.04086	RAD21
chr20	36685862	36686353	chr20	36849501	36849811	163148	88	131	16	-3.80736	3.17846	RAD21
chr1	87169984	87170474	chr1	87240066	87240260	69592	40	30	6	-3.50656	2.96905	RAD21
chr2	28789460	28790251	chr2	28976097	28976499	185846	103	122	16	-3.89357	3.17136	RAD21
chr18	56916485	56916748	chr18	56975773	56976076	59025	32	42	5	-3.98453	2.44343	RAD21
chr7	30323899	30324090	chr7	30391865	30392096	67775	41	54	5	-4.48368	2.05219	RAD21
chr1	205242497	205243073	chr1	205294502	205294976	51429	166	179	71	-1.77401	4.32005	RAD21
chr7	23610279	23610762	chr7	23752059	23752546	141297	60	93	12	-3.65713	3.2549	RAD21
chr19	1113209	1113703	chr19	1207322	1208130	93619	106	55	8	-4.51189	2.20336	RAD21
chr19	1113209	1113703	chr19	1240200	1240585	126497	106	132	12	-4.57643	2.33997	RAD21
chr12	105814461	105814740	chr12	106617965	106618254	803225	36	39	8	-3.0882	4.09596	RAD21
chr2	33259895	33260029	chr2	33597996	33598359	337967	75	44	4	-5.32909	2.18703	RAD21
chr17	73285500	73286460	chr17	73400268	73400917	113808	130	114	14	-4.32562	2.50743	RAD21
chr17	73285500	73286460	chr17	73401132	73401269	114672	130	96	14	-4.15377	2.67395	RAD21
chr17	73285500	73286460	chr17	73401649	73401971	115189	130	109	15	-4.14278	2.68718	RAD21
chr17	73285500	73286460	chr17	73408296	73409169	121836	130	178	23	-3.77833	3.066	RAD21
chr1	157280999	157281240	chr1	157459229	157459473	177989	74	86	13	-3.62851	3.38998	RAD21
chr13	48908764	48908981	chr13	49154407	49154770	245426	20	44	5	-3.56105	3.61007	RAD21
chr16	74896567	74897110	chr16	75164418	75164638	267308	98	20	3	-5.38348	2.03175	RAD21
chr15	75978564	75978756	chr15	76093910	76094140	115154	30	89	7	-3.99801	2.82318	RAD21
chr15	72036359	72036605	chr15	72448316	72448768	411711	15	59	3	-4.58836	2.84488	RAD21
chr10	99674579	99674844	chr10	100069269	100069770	394425	38	90	4	-5.36481	2.18005	RAD21
chr20	49410990	49411638	chr20	49546323	49546450	134685	111	113	15	-4.02082	2.89663	RAD21
chr6	3127274	3127451	chr6	3209410	3209739	81959	124	106	13	-4.35382	2.26947	RAD21
chr10	105472602	105473260	chr10	105644509	105644781	171249	106	50	12	-3.60565	3.39047	RAD21
chr5	95228466	95228814	chr5	95672122	95672540	443308	53	112	8	-4.52991	2.90954	RAD21
chr20	30145185	30145458	chr20	30200639	30201006	55181	30	178	9	-4.18853	2.22599	RAD21
chr7	98362406	98362811	chr7	98434398	98434729	71587	26	59	4	-4.56305	2.00396	RAD21
chr2	171092392	171093358	chr2	171180876	171181523	87518	252	159	22	-4.41625	2.24996	RAD21
chr4	154064787	154064924	chr4	154239893	154240311	174969	86	53	13	-3.29474	3.68677	RAD21
chr7	28966699	28967031	chr7	29448347	29448736	481316	32	65	5	-4.42125	3.01576	RAD21
chr9	6055161	6055643	chr9	6306029	6306250	250386	101	39	17	-2.61226	4.4675	RAD21
chr15	60877985	60878394	chr15	61209226	61209378	330832	31	17	3	-4.06998	3.28032	RAD21
chr15	31727522	31727802	chr15	31782312	31782544	54510	41	33	4	-4.43749	1.99848	RAD21
chr12	121499682	121500000	chr12	121647688	121648119	147688	82	46	5	-5.01648	2.01228	RAD21
chr10	71455832	71456217	chr10	71674366	71674693	218149	37	62	5	-4.51918	2.68671	RAD21
chr10	71455832	71456217	chr10	71560930	71561098	104713	37	34	4	-4.36469	2.41679	RAD21
chr6	49817168	49817606	chr6	49998457	49998948	180851	94	45	5	-5.13108	2.0253	RAD21
chr1	197584396	197584641	chr1	197837954	197838389	253313	43	50	7	-3.7814	3.42986	RAD21
chr22	31957292	31957726	chr22	32029821	32030172	72095	42	104	17	-2.71563	3.72264	RAD21
chr2	120510913	120511290	chr2	120764585	120764791	253295	69	20	3	-5.03261	2.31345	RAD21
chr2	120510913	120511290	chr2	120584024	120584249	72734	69	42	8	-3.81289	2.7086	RAD21
chr1	12467474	12467929	chr1	12678302	12678528	210373	101	128	13	-4.33725	2.8313	RAD21
chr1	12467474	12467929	chr1	12679169	12679303	211240	101	181	21	-3.72457	3.38656	RAD21
chr1	12467474	12467929	chr1	12679375	12680301	211446	101	211	21	-3.87793	3.24855	RAD21
chr19	34268918	34269331	chr19	34587190	34587574	317859	100	39	13	-3.13883	4.08729	RAD21
chr4	95327900	95328436	chr4	95516918	95517432	188482	62	110	10	-4.22244	2.87941	RAD21
chr20	52713236	52713887	chr20	52814581	52814813	100694	36	31	4	-4.24492	2.50227	RAD21
chr4	75800080	75800305	chr4	76215108	76215265	414803	28	15	3	-3.84303	3.47563	RAD21
chr3	142648945	142649089	chr3	142706009	142706257	56920	71	49	14	-2.87639	3.42109	RAD21
chr11	112090466	112090904	chr11	112666005	112666226	575101	77	17	4	-4.40443	3.04203	RAD21
chr2	8767923	8768091	chr2	8825848	8826208	57757	29	146	10	-3.74573	2.64741	RAD21
chr14	20795390	20795817	chr14	21074534	21074711	278717	33	51	3	-5.23111	2.19074	RAD21
chr14	20795390	20795817	chr14	21077553	21077920	281736	33	147	5	-5.26806	2.16389	RAD21
chr14	20795390	20795817	chr14	21077957	21078459	282140	33	148	5	-5.27484	2.15866	RAD21
chr1	212325531	212326010	chr1	212457997	212458209	131987	36	79	5	-4.73409	2.21791	RAD21
chr1	212325531	212326010	chr1	212458319	212458613	132309	36	91	5	-4.8755	2.08665	RAD21
chr3	152883075	152883266	chr3	153313069	153313302	429803	61	30	3	-5.31485	2.24173	RAD21
chr3	152883075	152883266	chr3	153008902	153009244	125636	61	101	8	-4.56711	2.34433	RAD21
chr9	136469488	136469636	chr9	136591524	136591689	121888	18	37	3	-4.30407	2.57189	RAD21
chr3	141022192	141022660	chr3	141169969	141170097	147309	67	191	15	-4.04087	2.91694	RAD21
chr3	141022192	141022660	chr3	141170579	141171455	147919	67	249	16	-4.17697	2.79244	RAD21
chr11	7914420	7914635	chr11	8008520	8008809	93885	32	23	7	-2.70941	3.8924	RAD21
chr15	27136425	27136801	chr15	27603910	27604272	467109	32	20	5	-3.24259	3.99757	RAD21
chr17	48929376	48929813	chr17	49027634	49028242	97821	69	133	18	-3.34371	3.3268	RAD21
chr2	62220645	62221039	chr2	62637220	62637413	416181	69	41	5	-4.7288	2.72804	RAD21
chr2	62220645	62221039	chr2	62524524	62524826	303485	69	89	11	-3.92695	3.38185	RAD21
chr1	68319306	68319716	chr1	68475770	68476115	156054	81	57	12	-3.46769	3.46988	RAD21
chr1	68319306	68319716	chr1	68517330	68517506	197614	81	41	9	-3.71357	3.36679	RAD21
chr1	68319306	68319716	chr1	68577365	68577834	257649	81	82	15	-3.38507	3.79195	RAD21
chr17	72297271	72297731	chr17	72350207	72350513	52476	88	39	9	-3.74645	2.59432	RAD21
chr17	72297271	72297731	chr17	72357555	72357948	59824	88	55	10	-3.8795	2.54602	RAD21
chr16	57333940	57334070	chr16	57456274	57456575	122204	178	56	19	-3.31826	3.50057	RAD21
chr8	103876348	103876528	chr8	104022875	104022995	146347	82	12	3	-4.6944	2.30667	RAD21
chr1	6101580	6101922	chr1	6403497	6403853	301575	28	137	4	-5.4796	2.01139	RAD21
chr5	163440166	163440509	chr5	163931112	163931500	490603	37	51	6	-3.95922	3.40368	RAD21
chr6	150401782	150402177	chr6	150654651	150654970	252474	98	124	12	-4.43544	2.84448	RAD21
chr2	119129184	119129391	chr2	119622675	119623105	493284	17	55	4	-4.06796	3.31352	RAD21
chr19	51207481	51207828	chr19	51286711	51287178	78883	120	126	15	-4.20767	2.38475	RAD21
chr18	56067337	56067522	chr18	56161124	56161343	93602	16	30	3	-3.97656	2.70432	RAD21
chr14	55030803	55031131	chr14	55240609	55241072	209478	96	210	32	-2.97998	4.05548	RAD21
chr14	55030803	55031131	chr14	55158309	55158660	127178	96	40	6	-4.66971	2.25576	RAD21
chr14	61928362	61928828	chr14	62197576	62197754	268748	72	20	8	-3.11352	4.0529	RAD21
chr14	61928362	61928828	chr14	62304293	62304755	375465	72	45	9	-3.68888	3.60124	RAD21
chr11	74854236	74854469	chr11	74916029	74916282	61560	79	84	11	-4.00447	2.44733	RAD21
chr12	55153594	55153863	chr12	55351815	55352161	197952	24	68	4	-4.62497	2.5402	RAD21
chr4	87855871	87856342	chr4	88013871	88014235	157529	91	114	13	-4.11716	2.87442	RAD21
chr4	87855871	87856342	chr4	88014593	88015135	158251	91	135	13	-4.28624	2.7207	RAD21
chr2	85875853	85876019	chr2	85934294	85934691	58275	19	63	4	-4.31498	2.13789	RAD21
chr2	85875853	85876019	chr2	85945148	85945500	69129	19	37	3	-4.35813	2.17741	RAD21
chr1	26231988	26232221	chr1	26324375	26325511	92154	63	367	21	-3.95945	2.71036	RAD21
chr5	133746943	133747295	chr5	133863312	133863637	116017	78	101	18	-3.19109	3.5871	RAD21
chr5	133746943	133747295	chr5	133862607	133862738	115312	78	91	17	-3.20114	3.5737	RAD21
chr4	112996373	112996704	chr4	113156037	113156597	159333	15	87	4	-4.40137	2.61815	RAD21
chr20	42166781	42167380	chr20	42319726	42319846	152346	59	59	11	-3.35928	3.56173	RAD21
chr1	10437957	10438218	chr1	10488048	10488403	49830	99	96	25	-2.72172	3.46237	RAD21
chr15	38732547	38732838	chr15	38920055	38920477	187217	32	55	5	-4.25419	2.84664	RAD21
chr9	95478780	95479111	chr9	95552955	95553438	73844	51	105	12	-3.61597	2.89999	RAD21
chr10	27735097	27735319	chr10	27945525	27945854	210206	17	39	4	-3.72419	3.38465	RAD21
chr12	69139663	69140054	chr12	69201603	69202071	61549	34	41	6	-3.65641	2.76518	RAD21
chr3	52035567	52035944	chr3	52178268	52178626	142324	107	60	11	-3.97138	2.96511	RAD21
chr17	72787625	72787968	chr17	72954039	72954327	166071	87	71	8	-4.5697	2.4875	RAD21
chr2	219552212	219552512	chr2	219712290	219712721	159778	19	78	4	-4.52856	2.50248	RAD21
chr15	89901756	89902362	chr15	90016043	90016391	113681	115	47	11	-3.79929	3.00178	RAD21
chr17	47645302	47645533	chr17	47772735	47773174	127202	56	77	9	-3.97471	2.90879	RAD21
chr2	39606868	39607253	chr2	39957833	39958163	350580	49	52	5	-4.62419	2.79994	RAD21
chr2	70141629	70142315	chr2	70289492	70289783	147177	117	36	6	-4.76217	2.24664	RAD21
chr5	149940014	149940160	chr5	150226559	150227034	286399	144	62	8	-4.93806	2.46484	RAD21
chr18	20070455	20070626	chr18	20142992	20143520	72366	34	118	7	-4.40522	2.15571	RAD21
chr4	26331913	26332192	chr4	26412336	26412632	80144	19	46	4	-4.00049	2.58687	RAD21
chr11	72300889	72301084	chr11	72353941	72354471	52857	65	96	20	-2.74727	3.48261	RAD21
chr15	75660908	75661079	chr15	75933118	75933478	272039	55	72	5	-5.06512	2.32462	RAD21
chr19	771322	771515	chr19	917508	918171	145993	107	113	12	-4.4304	2.55072	RAD21
chr2	178996976	178997306	chr2	179073623	179073799	76317	41	21	3	-4.56087	2.03778	RAD21
chr11	17752169	17752382	chr11	18000343	18000506	247961	43	50	6	-4.0897	3.14323	RAD21
chr10	72575391	72575872	chr10	72639669	72640158	63797	108	125	23	-3.23946	3.16768	RAD21
chr11	17752169	17752382	chr11	18001268	18001610	248886	43	62	6	-4.30482	2.95316	RAD21
chr2	131046021	131046428	chr2	131090059	131090554	43631	24	62	6	-3.72167	2.51613	RAD21
chr2	96688518	96688757	chr2	96782653	96783101	93896	23	54	4	-4.35189	2.35499	RAD21
chr6	20291811	20292382	chr6	20529446	20529708	237064	113	113	16	-3.9096	3.28009	RAD21
chr11	31418888	31419203	chr11	31892662	31892873	473459	23	24	4	-3.54096	3.74939	RAD21
chr1	205627899	205628020	chr1	205679969	205680768	51949	267	132	43	-2.94765	3.29382	RAD21
chr4	77973515	77973765	chr4	78124676	78125139	150911	40	112	11	-3.61159	3.32483	RAD21
chr10	89416290	89416619	chr10	89494988	89495361	78369	42	39	16	-1.85605	4.57471	RAD21
chr15	91598958	91599501	chr15	91790868	91791203	191367	79	15	4	-4.30491	2.81284	RAD21
chr10	135143248	135143571	chr10	135333702	135333966	190131	31	19	3	-4.1812	2.92187	RAD21
chr1	155066501	155066642	chr1	155139904	155140646	73262	65	170	28	-2.64578	3.79757	RAD21
chr16	12667572	12668220	chr16	12897787	12897958	229567	69	31	6	-4.08457	3.10585	RAD21
chr12	104277943	104278452	chr12	104502900	104503353	224448	65	96	6	-5.15522	2.13122	RAD21
chr18	21202301	21202481	chr18	21283099	21283400	80618	18	35	4	-3.67313	2.89582	RAD21
chr9	101762711	101763150	chr9	101902887	101903393	139737	167	126	20	-3.96281	2.96564	RAD21
chr9	101762711	101763150	chr9	101866966	101867299	103816	167	82	14	-4.2466	2.52191	RAD21
chr10	103991570	103991806	chr10	104111955	104112166	120149	84	36	8	-3.85545	2.98448	RAD21
chr7	28961491	28961705	chr7	29448347	29448736	486642	41	65	6	-4.30444	3.11479	RAD21
chr16	762871	763043	chr16	1105141	1105428	342098	103	35	4	-5.41749	2.11215	RAD21
chr16	762871	763043	chr16	835591	835897	72548	103	80	22	-2.83467	3.61596	RAD21
chr11	44797042	44797289	chr11	44915675	44916019	118386	26	59	4	-4.56305	2.30936	RAD21
chr1	200941111	200941461	chr1	201083232	201083570	141771	59	31	4	-4.73894	2.24847	RAD21
chr3	12180786	12181058	chr3	12521198	12521669	340140	83	129	14	-4.00054	3.34199	RAD21
chr2	217381485	217381883	chr2	217526385	217526664	144502	54	34	4	-4.74276	2.25478	RAD21
chr2	217381485	217381883	chr2	217529306	217529471	147423	54	41	6	-4.11904	2.8447	RAD21
chr6	168770925	168771340	chr6	169295066	169295531	523726	57	63	4	-5.4136	2.20106	RAD21
chr11	77185000	77185189	chr11	77330642	77331058	145453	23	22	3	-4.02931	2.92162	RAD21
chr4	38904303	38904719	chr4	39136890	39137237	232171	86	90	14	-3.67604	3.47837	RAD21
chr11	36724237	36724588	chr11	36768651	36768943	44063	34	32	7	-3.10028	3.04463	RAD21
chr20	55964298	55964437	chr20	56070037	56070606	105600	31	105	6	-4.50443	2.29105	RAD21
chr11	78356314	78356643	chr11	78787700	78787880	431057	55	16	4	-4.00733	3.3433	RAD21
chr3	58408755	58408981	chr3	58518486	58518774	109505	22	50	6	-3.41955	3.33429	RAD21
chr10	64353720	64354169	chr10	64917807	64918304	563638	25	100	3	-5.62682	2.03246	RAD21
chr1	26945971	26946144	chr1	27021876	27022176	75732	123	108	15	-4.07822	2.48342	RAD21
chr11	2177782	2177941	chr11	2441857	2442222	263916	23	89	3	-5.42691	1.98576	RAD21
chr1	228800104	228800450	chr1	229363237	229363511	562787	41	47	4	-4.79113	2.72216	RAD21
chr1	228800104	228800450	chr1	229292672	229292850	492222	41	20	3	-4.51208	2.94304	RAD21
chr2	182628846	182629147	chr2	182768748	182769110	139601	36	51	5	-4.29647	2.65395	RAD21
chr10	115464854	115465086	chr10	115863130	115863464	398044	22	45	4	-4.12512	3.23353	RAD21
chr14	75599160	75599621	chr14	75761905	75762127	162284	48	69	11	-3.30952	3.63388	RAD21
chr14	75599160	75599621	chr14	75770266	75770536	170645	48	66	10	-3.45569	3.52616	RAD21
chr2	167035813	167036006	chr2	167276170	167276513	240164	23	54	4	-4.35189	2.89126	RAD21
chr14	104038434	104038665	chr14	104216314	104216473	177649	12	14	3	-2.92674	4.03112	RAD21
chr1	199653863	199654196	chr1	200457761	200458140	803565	19	32	5	-3.1913	4.0132	RAD21
chr5	41856740	41857162	chr5	42767427	42768063	910265	69	35	5	-4.57058	2.8846	RAD21
chr4	83995229	83995448	chr4	84202529	84202716	207081	15	48	3	-4.38203	2.78302	RAD21
chr4	109755962	109756341	chr4	110327513	110327833	571172	53	57	6	-4.42982	3.02089	RAD21
chr4	109755962	109756341	chr4	110254135	110254405	497794	53	31	4	-4.63169	2.84478	RAD21
chr2	55277487	55277721	chr2	55394516	55395057	116795	135	206	29	-3.49856	3.30213	RAD21
chr2	55277487	55277721	chr2	55395535	55396061	117814	135	243	28	-3.73393	3.08624	RAD21
chr2	55277487	55277721	chr2	55395148	55395344	117427	135	223	30	-3.51005	3.29475	RAD21
chr20	25291015	25291292	chr20	25379788	25380074	88496	22	28	3	-4.22602	2.43502	RAD21
chr3	49171107	49171261	chr3	49486484	49486937	315223	40	68	4	-5.1358	2.33358	RAD21
chr16	84026412	84026590	chr16	84096409	84096662	69819	21	38	4	-3.90952	2.59758	RAD21
chr12	678874	679331	chr12	923429	923765	244098	79	97	12	-3.97435	3.2378	RAD21
chr14	23947563	23947828	chr14	24028705	24028989	80877	49	40	9	-3.18625	3.3523	RAD21
chr11	93916945	93917287	chr11	94237784	94238202	320497	43	48	5	-4.41353	2.97257	RAD21
chr2	26173834	26174335	chr2	26367944	26368464	193609	91	122	16	-3.7697	3.30595	RAD21
chr2	26173834	26174335	chr2	26366996	26367249	192661	91	94	15	-3.63805	3.42324	RAD21
chr13	29149488	29149688	chr13	29210689	29211272	61001	27	46	5	-3.9056	2.5328	RAD21
chr3	138313453	138313921	chr3	138634049	138635078	320128	62	146	9	-4.71629	2.70705	RAD21
chr15	68598566	68599429	chr15	68664955	68665120	65526	91	9	3	-4.51086	2.01204	RAD21
chr10	98832577	98833030	chr10	99115455	99115739	282425	46	32	3	-5.09715	2.31668	RAD21
chr17	73629034	73629298	chr17	73743925	73744193	114627	34	58	4	-4.81421	2.05242	RAD21
chr3	120280174	120280381	chr3	120513802	120513922	233421	20	41	7	-2.81748	4.25077	RAD21
chr3	120280174	120280381	chr3	120513945	120514206	233564	20	48	7	-2.97511	4.10977	RAD21
chr14	68085743	68085863	chr14	68171081	68171588	85218	118	101	16	-3.84063	2.77217	RAD21
chr1	159907203	159907332	chr1	159976178	159976585	68846	98	133	28	-2.81091	3.60689	RAD21
chr1	159907203	159907332	chr1	159977250	159977814	69918	98	157	29	-2.90662	3.52725	RAD21
chrX	118650240	118650648	chrX	118863851	118864169	213203	102	42	9	-3.96819	3.17111	RAD21
chrX	118650240	118650648	chrX	118708323	118708609	57675	102	55	11	-3.83652	2.5647	RAD21
chrX	118650240	118650648	chrX	118708631	118708950	57983	102	64	11	-3.98807	2.43079	RAD21
chr1	161179481	161180430	chr1	161351892	161352272	171462	60	40	7	-3.8914	3.12902	RAD21
chr8	125263992	125264164	chr8	125438310	125438585	174146	24	127	6	-4.43872	2.63611	RAD21
chr8	125263992	125264164	chr8	125438053	125438262	173889	24	107	6	-4.26736	2.79228	RAD21
chr1	26930242	26930381	chr1	27115383	27116184	185002	273	299	55	-3.29525	3.71478	RAD21
chr2	106193499	106193626	chr2	106404819	106405028	211193	69	57	5	-5.05828	2.18223	RAD21
chr11	36313919	36314273	chr11	36500293	36500572	186020	53	64	9	-3.73473	3.31676	RAD21
chr11	36313919	36314273	chr11	36514324	36514706	200051	53	43	8	-3.57261	3.50022	RAD21
chr3	142315057	142315316	chr3	142442747	142442951	127431	36	23	4	-3.94642	2.93647	RAD21
chr4	155473303	155473667	chr4	155543847	155544159	70180	81	69	9	-4.23411	2.29946	RAD21
chr1	40618630	40619157	chr1	40781008	40781269	161851	40	58	4	-4.97673	2.09731	RAD21
chr2	113521490	113521927	chr2	113575696	113575816	53769	53	30	5	-4.15261	2.24607	RAD21
chr9	130046371	130046575	chr9	130158973	130159172	112398	23	47	3	-4.78842	2.06414	RAD21
chr6	34954541	34955009	chr6	35208494	35208779	253485	105	109	9	-4.95086	2.38682	RAD21
chr6	34954541	34955009	chr6	35107457	35108289	152448	105	154	14	-4.4128	2.58684	RAD21
chr2	27184517	27184991	chr2	27308425	27308685	123434	174	132	17	-4.37543	2.51301	RAD21
chr1	52093416	52093720	chr1	52234565	52234985	140845	38	74	9	-3.5472	3.35617	RAD21
chr1	52093416	52093720	chr1	52235016	52235153	141296	38	91	9	-3.754	3.16464	RAD21
chr8	141840652	141840779	chr8	141937526	141937703	96747	113	20	5	-4.50424	2.2316	RAD21
chr12	93963174	93963797	chr12	94136685	94136904	172888	177	178	32	-3.42646	3.55989	RAD21
chr12	93963174	93963797	chr12	94135989	94136656	172192	177	169	32	-3.37458	3.60534	RAD21
chr12	93963174	93963797	chr12	94157598	94157766	193801	177	75	15	-4.07754	3.02651	RAD21
chr5	73198330	73198711	chr5	73936388	73936582	737677	60	43	7	-3.96372	3.40431	RAD21
chr16	68881231	68881474	chr16	69139220	69139783	257746	37	99	8	-4.04715	3.20193	RAD21
chr11	74991148	74991652	chr11	75095533	75095949	103881	63	143	21	-3.01693	3.67713	RAD21
chr2	71098654	71099082	chr2	71175655	71175831	76573	63	56	6	-4.58497	2.01706	RAD21
chr2	71098654	71099082	chr2	71174031	71174275	74949	63	56	10	-3.56332	2.95726	RAD21
chr9	130497440	130498009	chr9	130683785	130684158	185776	271	144	18	-4.79119	2.35237	RAD21
chr19	41955350	41955651	chr19	42077009	42077256	121358	74	30	6	-4.12174	2.74051	RAD21
chr1	109968965	109969165	chr1	110033240	110033531	64075	58	41	5	-4.55514	1.96153	RAD21
chr6	37759199	37759674	chr6	37980462	37980805	220788	75	48	5	-4.96981	2.288	RAD21
chr20	21789770	21789983	chr20	22293473	22293788	503490	22	34	3	-4.42018	3.02212	RAD21
chr8	2480878	2481252	chr8	2672053	2672434	190801	38	78	10	-3.38912	3.64495	RAD21
chr3	155713387	155713798	chr3	156100335	156100558	386537	49	18	3	-4.58497	2.83993	RAD21
chr3	100456257	100456519	chr3	100914868	100915347	458349	27	61	5	-4.18783	3.20312	RAD21
chr15	83680252	83680569	chr15	84049417	84049687	368848	82	33	4	-5.13064	2.36592	RAD21
chr3	52086981	52087177	chr3	52157185	52157424	70008	56	61	6	-4.55271	2.00312	RAD21
chr2	208610716	208611168	chr2	208905015	208905169	293847	58	27	5	-4.1374	3.18455	RAD21
chr2	208610716	208611168	chr2	208905576	208905770	294408	58	31	5	-4.27555	3.06325	RAD21
chr2	208610716	208611168	chr2	208837870	208838197	226702	58	27	7	-3.46446	3.65597	RAD21
chr2	208610716	208611168	chr2	208937013	208937356	325845	58	44	6	-4.26111	3.11039	RAD21
chr6	125513485	125513823	chr6	125635265	125635560	121442	32	63	4	-4.83628	2.06899	RAD21
chr5	131400461	131401380	chr5	131512754	131513051	111374	220	60	15	-4.07187	2.73209	RAD21
chr2	20861241	20861652	chr2	21185889	21186202	324237	35	22	3	-4.44917	2.94472	RAD21
chr8	141477029	141477841	chr8	141647521	141647776	169680	180	198	52	-2.57874	4.32812	RAD21
chr8	141477029	141477841	chr8	141646109	141646603	168268	180	197	56	-2.42546	4.46486	RAD21
chr5	59109873	59110004	chr5	59678714	59678882	568710	29	19	3	-4.11451	3.28084	RAD21
chr12	119882303	119882584	chr12	119982863	119983164	100279	27	51	6	-3.64414	3.06296	RAD21
chr12	119882303	119882584	chr12	120087136	120087483	204552	27	33	3	-4.59512	2.58409	RAD21
chrX	154208828	154208977	chrX	154314858	154315101	105881	65	23	5	-4.09101	2.68117	RAD21
chrX	154208828	154208977	chrX	154277376	154277625	68399	65	30	5	-4.35671	2.17376	RAD21
chr17	34985628	34986075	chr17	35596946	35597163	610871	58	39	3	-5.52678	2.12374	RAD21
chr13	95844013	95844345	chr13	96056539	96056981	212194	47	101	9	-4.07082	3.07615	RAD21
chr16	11196005	11196391	chr16	11349528	11349776	153137	60	162	8	-5.02306	2.0242	RAD21
chrX	100851133	100851462	chrX	101054407	101054550	202945	26	22	4	-3.57655	3.50284	RAD21
chr2	219717662	219717908	chr2	219867858	219868093	149950	36	19	3	-4.33073	2.65578	RAD21
chr2	219717662	219717908	chr2	219762898	219763431	44990	36	42	5	-4.10231	2.21015	RAD21
chr17	34303117	34303289	chr17	34476401	34476765	173112	15	56	3	-4.53618	2.54328	RAD21
chr2	37622995	37623469	chr2	38059648	38060085	436179	65	71	9	-4.04262	3.31587	RAD21
chr2	37622995	37623469	chr2	38104592	38104990	481123	65	48	4	-5.273	2.30424	RAD21
chr2	37622995	37623469	chr2	38118120	38118391	494651	65	38	4	-5.03938	2.5042	RAD21
chr19	13096036	13096259	chr19	13190382	13190520	94123	90	14	4	-4.36628	2.34303	RAD21
chr19	13096036	13096259	chr19	13172059	13172500	75800	90	112	12	-4.2485	2.32527	RAD21
chr1	19717716	19718261	chr1	19908038	19908195	189777	57	80	7	-4.53326	2.60018	RAD21
chr1	19717716	19718261	chr1	19908578	19909184	190317	57	96	7	-4.71558	2.4358	RAD21
chr5	34485880	34486771	chr5	35003400	35003805	516629	143	87	8	-5.26987	2.31866	RAD21
chr8	18769747	18770143	chr8	19125181	19125433	355038	25	28	4	-3.77849	3.52808	RAD21
chr1	13992116	13992619	chr1	14286841	14287247	294222	52	45	4	-4.98532	2.43601	RAD21
chr1	13992116	13992619	chr1	14133832	14133989	141213	52	11	4	-3.57655	3.32977	RAD21
chr1	13992116	13992619	chr1	14140203	14140390	147584	52	23	6	-3.50322	3.41698	RAD21
chr12	118737694	118737839	chr12	118813665	118814355	75826	29	232	12	-3.84422	2.70206	RAD21
chr12	116972207	116972546	chr12	117036214	117036921	63668	91	198	32	-2.86765	3.50779	RAD21
chr12	116972207	116972546	chr12	117037085	117037961	64539	91	261	32	-3.14391	3.26223	RAD21
chr8	29197728	29198099	chr8	29908569	29909045	710470	68	53	6	-4.60628	2.88485	RAD21
chr3	10206313	10206634	chr3	10266541	10266933	59907	42	56	8	-3.60414	2.7971	RAD21
chr1	52034989	52035287	chr1	52235016	52235153	199729	39	91	11	-3.37863	3.67547	RAD21
chr1	52034989	52035287	chr1	52234565	52234985	199278	39	74	11	-3.17184	3.86214	RAD21
chr1	40627445	40627730	chr1	40723825	40723949	96095	54	33	4	-4.7129	2.03167	RAD21
chr1	40627445	40627730	chr1	40723640	40723771	95910	54	26	4	-4.47449	2.25373	RAD21
chr18	21095888	21096253	chr18	21166641	21167310	70388	59	131	26	-2.43654	3.96679	RAD21
chr11	87749676	87749906	chr11	88277460	88277968	527554	20	58	4	-4.28359	3.13897	RAD21
chr10	22862955	22863309	chr10	23276019	23276451	412710	49	74	5	-4.97701	2.5168	RAD21
chr10	22862955	22863309	chr10	23277729	23278269	414420	49	124	7	-4.82028	2.65	RAD21
chr12	121499447	121499583	chr12	121647688	121648119	148105	85	46	5	-5.05242	1.9804	RAD21
chr8	29198964	29199149	chr8	29580422	29580830	381273	80	54	11	-3.57522	3.69909	RAD21
chr10	63511715	63511835	chr10	63594812	63595187	82977	85	98	14	-3.7495	2.84131	RAD21
chr2	113895967	113896270	chr2	113984939	113985133	88669	66	24	6	-3.78419	2.84976	RAD21
chr20	47274221	47274639	chr20	47521294	47521965	246655	139	172	53	-2.14138	4.88101	RAD21
chr2	238062777	238063008	chr2	238480576	238481170	417568	22	73	3	-5.18428	2.34417	RAD21
chr6	69282453	69282824	chr6	69488430	69488857	205606	38	123	5	-5.23089	2.01135	RAD21
chr20	33126503	33126806	chr20	33293197	33293416	166391	47	60	5	-4.72562	2.34536	RAD21
chr20	33126503	33126806	chr20	33296373	33296628	169567	47	73	9	-3.74616	3.2561	RAD21
chr18	48188608	48188867	chr18	48311142	48311386	122275	23	23	9	-1.87654	4.85661	RAD21
chr3	49377143	49377368	chr3	49486484	49486937	109116	81	68	10	-4.00879	2.77806	RAD21
chr4	125255304	125255504	chr4	126204948	126205170	949444	20	19	3	-3.74295	3.52613	RAD21
chr14	31126897	31127032	chr14	31376021	31376241	248989	25	12	3	-3.50656	3.66623	RAD21
chr1	203473677	203474255	chr1	203608007	203608308	133752	90	33	6	-4.4128	2.52616	RAD21
chr21	30462369	30462660	chr21	30744517	30745009	281857	46	96	8	-4.23411	3.08051	RAD21
chr2	105730933	105731330	chr2	105854512	105854666	123182	53	36	6	-3.97029	2.89259	RAD21
chr2	105730933	105731330	chr2	105852000	105852377	120670	53	38	8	-3.44899	3.36954	RAD21
chr2	105730933	105731330	chr2	105796099	105796604	64769	53	20	6	-3.38251	3.04483	RAD21
chr3	152891934	152892283	chr3	153008067	153008384	115784	67	90	10	-4.09933	2.73137	RAD21
chr3	152891934	152892283	chr3	153008902	153009244	116619	67	101	9	-4.42536	2.42926	RAD21
chr2	201483328	201483567	chr2	201535194	201535335	51627	25	11	3	-3.41955	2.87395	RAD21
chr2	201483328	201483567	chr2	201567820	201568228	84253	25	58	5	-4.06044	2.55962	RAD21
chr9	101077719	101078231	chr9	101537182	101537396	458951	118	87	6	-5.65307	1.97531	RAD21
chr9	101077719	101078231	chr9	101469382	101469756	391151	118	87	8	-5.07771	2.42249	RAD21
chr9	101077719	101078231	chr9	101285768	101286089	207537	118	38	6	-4.82475	2.38378	RAD21
chr1	168204520	168204873	chr1	168335046	168335241	130173	66	16	4	-4.18965	2.72083	RAD21
chr1	168204520	168204873	chr1	168291230	168291455	86357	66	70	7	-4.54633	2.11992	RAD21
chr11	68899053	68899438	chr11	69458599	69458722	559161	19	95	3	-5.30109	2.30065	RAD21
chr11	68899053	68899438	chr11	69457929	69458417	558491	19	82	3	-5.15393	2.4221	RAD21
chr5	172143812	172144123	chr5	172198188	172198504	54065	112	184	19	-4.04456	2.34469	RAD21
chr5	172143812	172144123	chr5	172197574	172197938	53451	112	152	16	-4.1972	2.20382	RAD21
chrX	71465417	71465668	chrX	71760217	71760469	294549	25	33	3	-4.51816	2.84915	RAD21
chr2	43839657	43839942	chr2	44104976	44105375	265034	35	70	4	-5.03125	2.34029	RAD21
chr14	90439603	90439894	chr14	90526685	90526972	86791	18	40	7	-2.68743	3.86275	RAD21
chr12	56511805	56512487	chr12	56583235	56583655	70748	246	140	33	-3.45396	3.02667	RAD21
chr9	7052632	7052932	chr9	7186296	7186508	133364	32	27	3	-4.56435	2.38266	RAD21
chr19	7917849	7918569	chr19	7990109	7990408	71540	92	56	11	-3.75135	2.75684	RAD21
chr1	111173460	111173702	chr1	111323540	111323818	149838	36	39	3	-5.04986	1.98869	RAD21
chr1	111173460	111173702	chr1	111308713	111309143	135011	36	60	10	-3.07269	3.78545	RAD21
chr1	116694680	116694983	chr1	117027770	117028188	332787	43	110	6	-4.87816	2.57668	RAD21
chrX	10157662	10158038	chrX	10690865	10691142	532827	69	30	3	-5.43808	2.18276	RAD21
chrX	10157662	10158038	chrX	10604455	10604736	446417	69	39	5	-4.67879	2.786	RAD21
chr22	40920616	40920770	chr22	41042109	41042526	121339	31	92	8	-3.79689	3.04591	RAD21
chr15	74927447	74928068	chr15	75063344	75063663	135276	172	97	17	-4.05578	2.86579	RAD21
chr20	44174814	44175033	chr20	44399681	44400217	224648	23	76	4	-4.69364	2.54661	RAD21
chr20	44937109	44937265	chr20	45039386	45039901	102121	68	77	15	-3.14721	3.5425	RAD21
chr3	38885495	38885688	chr3	39072199	39072667	186511	44	80	5	-4.94734	2.21238	RAD21
chr11	72296809	72297134	chr11	72395611	72395844	98477	73	143	14	-3.97519	2.73958	RAD21
chr11	72296809	72297134	chr11	72394720	72395207	97586	73	123	15	-3.68654	3.00377	RAD21
chr11	72296809	72297134	chr11	72353941	72354471	56807	73	96	13	-3.72491	2.65666	RAD21
chr17	42610791	42611345	chr17	42713914	42714288	102569	122	66	18	-3.21293	3.48399	RAD21
chr12	118312534	118312700	chr12	118472578	118472890	159878	46	28	6	-3.57733	3.37946	RAD21
chr1	110260957	110261446	chr1	110316331	110316647	54885	63	155	16	-3.64138	2.71182	RAD21
chr5	38208893	38209166	chr5	38809832	38810407	600666	30	103	4	-5.26334	2.3382	RAD21
chr17	17400143	17400409	chr17	17473640	17473829	73231	39	51	8	-3.4365	3.06221	RAD21
chr17	17400143	17400409	chr17	17472094	17472364	71685	39	57	10	-3.10144	3.36108	RAD21
chr11	62554606	62555074	chr11	62629981	62630416	74907	86	71	8	-4.55814	2.03076	RAD21
chr12	25830185	25830590	chr12	26170488	26170849	339898	52	40	5	-4.42125	2.97657	RAD21
chr12	25830185	25830590	chr12	26182218	26182495	351628	52	43	6	-4.12892	3.22735	RAD21
chr1	1342615	1342889	chr1	1407025	1407199	64136	24	27	3	-4.27667	2.21779	RAD21
chr1	1342615	1342889	chr1	1406685	1406978	63796	24	22	3	-4.07187	2.40336	RAD21
chr3	126398137	126398496	chr3	126465395	126465628	66899	47	26	5	-3.88937	2.59481	RAD21
chr11	69500713	69500944	chr11	69703350	69703617	202406	38	36	5	-4.00223	3.11598	RAD21
chr15	77942734	77942912	chr15	78112613	78112908	169701	27	86	4	-4.9776	2.12615	RAD21
chr15	77942734	77942912	chr15	78113750	78114092	170838	27	108	6	-4.39445	2.6654	RAD21
chr2	46768974	46769225	chr2	46828632	46828785	59407	41	36	5	-4.07822	2.36183	RAD21
chr6	30882305	30882464	chr6	31038501	31038746	156037	195	56	11	-4.50256	2.51421	RAD21
chr6	30882305	30882464	chr6	31012187	31012351	129723	195	69	12	-4.53729	2.39244	RAD21
chr4	155480549	155481080	chr4	155539956	155540201	58876	57	67	8	-4.08886	2.34757	RAD21
chr19	12996153	12996562	chr19	13049133	13049596	52571	83	59	8	-4.33749	2.07256	RAD21
chr2	44619619	44619762	chr2	44706557	44706918	86795	24	65	6	-3.76892	2.85061	RAD21
chr17	56390330	56390519	chr17	56524789	56525196	134270	19	119	4	-4.95097	2.02387	RAD21
chr11	44578996	44579174	chr11	44638479	44638737	59305	98	110	47	-1.58515	4.62289	RAD21
chr10	94644757	94644999	chr10	95048770	95049127	403771	24	41	3	-4.6944	2.75241	RAD21
chr20	10450142	10450492	chr20	10517239	10517382	66747	29	17	4	-3.42792	3.01945	RAD21
chrX	23925678	23926443	chrX	24043415	24043827	116972	100	45	9	-4.01738	2.81501	RAD21
chr10	119620429	119620658	chr10	120000725	120001227	380067	21	50	3	-4.75932	2.68893	RAD21
chr1	36789218	36789441	chr1	36834522	36834932	45081	24	55	4	-4.4128	1.94768	RAD21
chr20	22314776	22315156	chr20	22567297	22567707	252141	46	69	4	-5.29016	2.08096	RAD21
chr20	22314776	22315156	chr20	22664690	22664938	349534	46	66	7	-4.12648	3.23023	RAD21
chr15	85198011	85198233	chr15	85291748	85292154	93515	43	43	4	-4.74981	1.97996	RAD21
chr20	49242629	49243052	chr20	49404547	49405043	161495	44	71	6	-4.46335	2.56876	RAD21
chr20	49242629	49243052	chr20	49361022	49361382	117970	44	42	4	-4.74927	2.13192	RAD21
chr8	26528066	26528485	chr8	27062522	27062813	534037	37	38	3	-5.05128	2.50348	RAD21
chr15	43397833	43398137	chr15	43477396	43477631	79259	30	43	4	-4.38981	2.21739	RAD21
chr20	13305722	13305962	chr20	13527256	13527535	221294	22	33	3	-4.39033	2.81075	RAD21
chr9	139540348	139540624	chr9	139588325	139589086	47701	91	96	19	-3.18633	3.02711	RAD21
chr9	139540348	139540624	chr9	139589139	139589270	48515	91	111	19	-3.33151	2.91273	RAD21
chr7	158286722	158287111	chr7	158768509	158768730	481398	42	94	4	-5.50838	2.10775	RAD21
chr20	55964605	55964775	chr20	56027205	56027341	62430	39	31	4	-4.32496	2.16105	RAD21
chr3	197025466	197025726	chr3	197072350	197072490	46624	58	17	4	-4.12107	2.21009	RAD21
chr1	94528992	94529119	chr1	94929117	94929588	399998	26	39	4	-4.14907	3.21358	RAD21
chr1	94528992	94529119	chr1	94801332	94801794	272213	26	58	6	-3.73502	3.50647	RAD21
chr8	70854669	70854969	chr8	71000738	71001088	145769	29	31	3	-4.60406	2.38853	RAD21
chr19	14472676	14472869	chr19	14516807	14517417	43938	21	121	7	-3.94849	2.32913	RAD21
chr17	71188683	71188877	chr17	71243915	71244178	55038	72	24	7	-3.5629	2.7835	RAD21
chr8	106437162	106437627	chr8	106785171	106785518	347544	38	47	3	-5.29051	2.22381	RAD21
chr17	16267007	16267447	chr17	16318313	16318553	50866	44	48	11	-2.8596	3.35681	RAD21
chrX	109411135	109411394	chrX	109661557	109661742	250163	40	29	3	-4.85895	2.46126	RAD21
chr21	45567031	45567407	chr21	45687458	45688269	120051	118	169	28	-3.23617	3.56642	RAD21
chr21	45567031	45567407	chr21	45717561	45717830	150154	118	71	15	-3.61726	3.31776	RAD21
chr1	151168722	151169054	chr1	151313202	151313837	144148	43	58	4	-5.04905	1.96854	RAD21
chr5	136965272	136965664	chr5	137078794	137079047	113130	55	39	4	-4.89831	1.96493	RAD21
chr12	122492318	122492780	chr12	122607602	122608182	114822	136	133	36	-2.63597	4.10259	RAD21
chr10	27512889	27513076	chr10	27574136	27574344	61060	11	15	3	-2.90872	3.44272	RAD21
chr2	26074822	26075127	chr2	26367944	26368464	292817	51	122	5	-5.51697	1.96397	RAD21
chr11	64901849	64902121	chr11	64949139	64949288	47018	43	117	14	-3.24526	2.96654	RAD21
chr5	118357569	118358103	chr5	118747552	118748128	389449	59	108	9	-4.36522	3.02775	RAD21
chr5	90795779	90796279	chr5	94185954	94186285	3389675	28	31	3	-4.56897	2.81046	RAD21
chr17	79282876	79283690	chr17	79375786	79376045	92096	95	58	8	-4.45544	2.2458	RAD21
chr1	36034507	36034879	chr1	36183530	36183718	148651	137	50	10	-4.22683	2.74836	RAD21
chr1	36034507	36034879	chr1	36192202	36192877	157323	137	127	28	-3.09976	3.81259	RAD21
chr1	36034507	36034879	chr1	36181011	36181400	146132	137	90	22	-3.23771	3.65951	RAD21
chr1	93913401	93913796	chr1	94036201	94036390	122405	42	23	3	-4.67594	2.22498	RAD21
chr1	45988088	45988264	chr1	46035581	46036286	47317	62	128	11	-4.18337	2.16307	RAD21
chrX	122584123	122584426	chrX	122648310	122648455	63884	18	23	3	-3.82864	2.62739	RAD21
chr6	138026498	138026926	chr6	138296499	138297236	269573	136	141	12	-4.8916	2.4738	RAD21
chr19	14070880	14071036	chr19	14142692	14143350	71656	21	66	4	-4.46159	2.09858	RAD21
chr9	73034059	73034187	chr9	73099387	73099923	65200	61	82	14	-3.23948	3.18017	RAD21
chr5	156769895	156770106	chr5	156903917	156904377	133811	30	74	7	-3.81344	3.08803	RAD21
chrX	150918323	150918546	chrX	151800878	151801242	882332	34	30	3	-4.73033	2.76459	RAD21
chrX	150918323	150918546	chrX	151801266	151801406	882720	34	39	3	-4.9927	2.55641	RAD21
chr6	167897875	167898123	chr6	168299310	168299750	401187	23	68	3	-5.15778	2.35879	RAD21
chr5	172197574	172197938	chr5	172329830	172330201	131892	152	117	15	-4.36995	2.55909	RAD21
chr5	172197574	172197938	chr5	172261122	172261264	63184	152	48	10	-4.28991	2.1987	RAD21
chr7	56072576	56072822	chr7	56141830	56142431	69008	38	59	8	-3.55624	2.91859	RAD21
chr1	27882919	27883634	chr1	27930669	27930849	47035	113	89	14	-3.93791	2.37145	RAD21
chr1	27882919	27883634	chr1	27932408	27932628	48774	113	208	29	-3.33033	2.91717	RAD21
chr1	27882919	27883634	chr1	27932790	27933193	49156	113	222	28	-3.46566	2.80438	RAD21
chr1	55750545	55750951	chr1	57045365	57045490	1294414	58	20	3	-4.85895	2.61443	RAD21
chr1	31537378	31537849	chr1	31627511	31627676	89662	66	42	7	-4.0355	2.62164	RAD21
chr1	75731468	75731760	chr1	76098045	76098390	366285	25	37	3	-4.63257	2.79182	RAD21
chr3	59561230	59561576	chr3	59843525	59843761	281949	34	13	3	-3.89409	3.38202	RAD21
chr12	94161002	94161326	chr12	94372407	94373341	211081	103	92	9	-4.76207	2.4494	RAD21
chr12	94161002	94161326	chr12	94495112	94495546	333786	103	172	17	-4.1158	3.24145	RAD21
chr12	94161002	94161326	chr12	94495959	94496343	334633	103	175	15	-4.38341	3.00858	RAD21
chr5	66541963	66542290	chr5	67548500	67548853	1006210	23	38	5	-3.5542	3.65756	RAD21
chr8	144923342	144923649	chr8	144976549	144977092	52900	57	98	8	-4.46914	1.95851	RAD21
chr6	143554079	143554334	chr6	143748351	143748643	194017	24	49	3	-4.87265	2.3041	RAD21
chr14	70046945	70047172	chr14	70193492	70194025	146320	23	120	8	-3.7641	3.17096	RAD21
chr2	27543894	27544194	chr2	27592881	27593547	48687	43	96	12	-3.35574	2.89398	RAD21
chr5	132446832	132447364	chr5	132596513	132596720	149149	174	41	12	-3.90281	3.05038	RAD21
chr5	132446832	132447364	chr5	132583330	132584033	135966	174	146	52	-2.24017	4.56679	RAD21
chr11	73336805	73337075	chr11	73642358	73642794	305283	60	43	5	-4.63667	2.75918	RAD21
chr2	208967022	208967173	chr2	209118904	209119273	151731	33	60	9	-3.1964	3.71123	RAD21
chr2	208967022	208967173	chr2	209130723	209131019	163550	33	36	3	-4.8828	2.19021	RAD21
chr2	208967022	208967173	chr2	209119601	209120305	152428	33	73	10	-3.1818	3.72618	RAD21
chr1	167035822	167036244	chr1	167411404	167411776	375160	94	92	9	-4.67063	2.76245	RAD21
chr14	91789934	91790250	chr14	91885216	91885398	94966	38	44	14	-2.14366	4.42989	RAD21
chr5	132166207	132166670	chr5	132219337	132219516	52667	108	63	16	-3.28009	3.00874	RAD21
chr7	8317111	8317370	chr7	8405200	8405476	87830	26	28	3	-4.39308	2.27388	RAD21
chr19	1546206	1546487	chr19	1671822	1672588	125335	71	183	10	-4.867	2.06093	RAD21
chr1	16515363	16515499	chr1	16570770	16571404	55271	215	137	20	-4.29915	2.12787	RAD21
chr5	139015229	139015644	chr5	139145098	139145769	129454	101	112	13	-4.20372	2.70436	RAD21
chr1	113683129	113683672	chr1	114220462	114221094	536790	120	121	15	-4.16718	3.23615	RAD21
chr1	30631958	30632209	chr1	30705104	30705629	72895	18	90	4	-4.61759	1.96196	RAD21
chr19	39601027	39601350	chr19	39903408	39903573	302058	34	207	6	-5.27556	2.19194	RAD21
chr5	54201751	54202132	chr5	54455500	54455842	253368	51	52	10	-3.2779	3.87921	RAD21
chr5	54201751	54202132	chr5	54442432	54442692	240300	51	42	10	-3.06433	4.04356	RAD21
chr17	6569354	6569760	chr17	7039613	7039839	469853	45	39	3	-5.273	2.29922	RAD21
chr1	53370545	53370961	chr1	53531203	53531353	160242	50	19	5	-3.63759	3.32513	RAD21
chr1	53370545	53370961	chr1	53647753	53648046	276792	50	63	4	-5.28257	2.14123	RAD21
chr10	126738094	126738220	chr10	126849997	126850328	111777	55	36	5	-4.37198	2.45222	RAD21
chr10	126738094	126738220	chr10	126833582	126833931	95362	55	22	7	-3.20656	3.43743	RAD21
chr2	24644553	24644945	chr2	24713588	24714136	68643	78	74	8	-4.50189	2.04114	RAD21
chr2	24644553	24644945	chr2	25050395	25050953	405450	78	138	11	-4.48817	2.92758	RAD21
chr12	65001990	65002201	chr12	65073347	65073492	71146	64	14	3	-4.60072	1.96611	RAD21
chr5	39217865	39218317	chr5	39283001	39284036	64684	127	173	26	-3.48129	2.95325	RAD21
chr14	81462700	81462970	chr14	81630486	81630795	167516	25	34	5	-3.52636	3.45129	RAD21
chr14	81462700	81462970	chr14	81629371	81629665	166401	25	26	4	-3.70438	3.28406	RAD21
chr1	201866067	201866189	chr1	201941801	201942083	75612	143	109	32	-2.72272	3.74514	RAD21
chr1	201866067	201866189	chr1	201914348	201914624	48159	143	31	11	-3.60104	2.67474	RAD21
chr2	48828605	48828789	chr2	48952904	48953131	124115	54	27	8	-3.12594	3.69118	RAD21
chr2	48828605	48828789	chr2	50719644	50719882	1890855	54	26	3	-5.04986	2.45289	RAD21
chr2	48828605	48828789	chr2	50718860	50718980	1890071	54	24	3	-4.96981	2.51412	RAD21
chr6	85725113	85725419	chr6	85836531	85836989	111112	23	56	4	-4.38826	2.43306	RAD21
chr8	17582196	17582316	chr8	17772336	17772624	190020	37	71	6	-4.29008	2.82239	RAD21
chr8	17582196	17582316	chr8	17770202	17770530	187886	37	88	17	-2.42183	4.51879	RAD21
chr8	17582196	17582316	chr8	17722114	17722343	139798	37	23	3	-4.54919	2.41879	RAD21
chr2	234766152	234766966	chr2	234837340	234837496	70374	62	12	3	-4.41482	2.13333	RAD21
chr2	70530968	70531292	chr2	70844641	70845028	313349	66	43	5	-4.73198	2.68562	RAD21
chr2	70530968	70531292	chr2	70875050	70875396	343758	66	46	5	-4.79942	2.6486	RAD21
chr12	116435846	116436259	chr12	117037085	117037961	600826	46	261	7	-5.50134	2.14277	RAD21
chr12	116435846	116436259	chr12	117036214	117036921	599955	46	198	7	-5.22509	2.3695	RAD21
chr2	173892155	173892566	chr2	174075211	174075674	182645	82	63	13	-3.41996	3.59425	RAD21
chr7	83565452	83565804	chr7	84650461	84650697	1084657	20	57	4	-4.26619	3.08901	RAD21
chr12	25589298	25589710	chr12	26182218	26182495	592508	52	43	4	-4.93986	2.60285	RAD21
chr12	25589298	25589710	chr12	26170488	26170849	580778	52	40	4	-4.86753	2.66096	RAD21
chr12	25589298	25589710	chr12	25710810	25711063	121100	52	13	3	-4.31897	2.55365	RAD21
chr1	213191047	213191199	chr1	213243292	213243483	52093	40	67	8	-3.73469	2.60097	RAD21
chr4	113554469	113554617	chr4	113686872	113687041	132255	32	18	3	-4.15888	2.75853	RAD21
chr10	99435983	99436129	chr10	99491553	99491898	55424	40	25	5	-3.68888	2.67493	RAD21
chr21	45533940	45534174	chr21	45687458	45688269	153284	21	169	7	-4.2826	2.70962	RAD21
chr1	70994508	70994871	chr1	71515575	71516233	520704	31	82	7	-3.94889	3.41606	RAD21
chr4	184393413	184393895	chr4	184523829	184524146	129934	42	28	5	-3.851	3.03765	RAD21
chr9	112203078	112203361	chr9	112282736	112283126	79375	18	33	3	-4.18965	2.40497	RAD21
chr2	225222116	225222502	chr2	225643174	225643470	420672	35	16	3	-4.13071	3.2347	RAD21
chr19	51799669	51799894	chr19	52160085	52160718	360191	33	99	4	-5.31904	2.20159	RAD21
chr1	2344044	2344185	chr1	2478406	2478982	134221	31	94	5	-4.75841	2.2041	RAD21
chr1	2344044	2344185	chr1	2479010	2479135	134825	31	106	6	-4.51391	2.43533	RAD21
chr1	2344044	2344185	chr1	2479472	2479866	135287	31	110	6	-4.55095	2.40227	RAD21
chr12	12989990	12990253	chr12	13043468	13043625	53215	14	23	6	-2.19103	3.98052	RAD21
chr11	57113034	57113564	chr11	58281246	58281594	1167682	150	33	4	-5.73455	1.94562	RAD21
chr12	65190526	65190678	chr12	65284421	65285021	93743	40	55	5	-4.47734	2.23653	RAD21
chr2	10362433	10362588	chr2	10548443	10549574	185855	33	136	5	-5.19029	1.98861	RAD21
chr7	94078455	94078847	chr7	94876256	94876477	797409	30	25	4	-3.84748	3.48858	RAD21
chr7	29917703	29918003	chr7	30101648	30101792	183645	43	55	6	-4.18501	2.89869	RAD21
chr7	29917703	29918003	chr7	30102286	30102750	184283	43	67	6	-4.38237	2.72055	RAD21
chr12	49525158	49525438	chr12	49628969	49629209	103531	85	114	11	-4.38306	2.39189	RAD21
chr12	49525158	49525438	chr12	49628173	49628599	102735	85	127	15	-3.87074	2.86758	RAD21
chr12	49525158	49525438	chr12	49626806	49627009	101368	85	82	11	-4.05358	2.68651	RAD21
chr3	57204087	57204487	chr3	57255981	57256201	51494	46	21	4	-4.10058	2.27286	RAD21
chr14	60099181	60099380	chr14	60364605	60364747	265225	18	10	3	-2.99573	4.15202	RAD21
chr1	65701401	65702138	chr1	66153092	66153843	450954	86	125	9	-4.88821	2.61247	RAD21
chr17	38358131	38358400	chr17	38447016	38447272	88616	44	63	8	-3.76844	2.86413	RAD21
chr6	104973607	104973909	chr6	105219163	105219448	245254	80	60	5	-5.2575	2.09364	RAD21
chr10	99519261	99519673	chr10	99629237	99629527	109564	52	63	10	-3.48921	3.26916	RAD21
chr10	100505545	100505674	chr10	101006567	101006775	500893	8	19	3	-2.82666	4.34822	RAD21
chr14	100850062	100850301	chr14	101112100	101112474	261799	52	81	7	-4.45387	2.84771	RAD21
chr14	100850062	100850301	chr14	101119666	101120049	269365	52	112	6	-5.08622	2.30038	RAD21
chr11	123942088	123942394	chr11	124199772	124199929	257378	62	24	6	-3.72167	3.49135	RAD21
chr5	173447438	173447724	chr5	173738983	173739277	291259	35	50	6	-3.88385	3.40517	RAD21
chr1	111162015	111162284	chr1	111308713	111309143	146429	61	60	11	-3.40943	3.50083	RAD21
chr12	93963174	93963797	chr12	94495112	94495546	531315	177	172	12	-5.35383	2.25227	RAD21
chr19	39613397	39613581	chr19	39677956	39678317	64375	93	36	6	-4.5326	1.98426	RAD21
chr19	51698332	51698452	chr19	51762521	51763134	64069	13	178	6	-4.16321	2.32153	RAD21
chr6	47381751	47382269	chr6	47599153	47599564	216884	74	67	6	-4.92524	2.31755	RAD21
chr12	57233429	57234331	chr12	57395174	57395573	160843	158	150	34	-3.02051	3.89555	RAD21
chr12	57233429	57234331	chr12	57381723	57381912	147392	158	146	34	-2.99348	3.8898	RAD21
chr12	57233429	57234331	chr12	57382026	57382327	147695	158	157	32	-3.18737	3.71053	RAD21
chr12	57233429	57234331	chr12	57381216	57381698	146885	158	134	36	-2.7934	4.07435	RAD21
chr4	10166452	10167029	chr4	10405012	10405706	237983	101	218	25	-3.56186	3.59346	RAD21
chr10	86134621	86135130	chr10	86297139	86297524	162009	66	170	14	-4.04734	2.95366	RAD21
chr9	90293681	90293935	chr9	90427400	90428186	133465	37	102	9	-3.84144	3.06062	RAD21
chr9	90293681	90293935	chr9	90425654	90426015	131719	37	52	5	-4.34329	2.58338	RAD21
chr19	16882317	16882717	chr19	17010458	17010842	127741	75	61	9	-4.03391	2.85577	RAD21
chr3	152760757	152761146	chr3	153313069	153313302	551923	96	30	5	-4.74667	2.75785	RAD21
chr14	23463969	23464420	chr14	23521404	23521775	56984	65	92	10	-4.09101	2.32903	RAD21
chr1	53166610	53166818	chr1	53435812	53436039	268994	34	38	3	-4.96672	2.40585	RAD21
chr15	74666732	74666924	chr15	74924262	74924613	257338	180	97	11	-4.97188	2.37669	RAD21
chr1	160162805	160163412	chr1	160261184	160261578	97772	123	48	9	-4.28894	2.44049	RAD21
chr10	79254316	79254478	chr10	79401324	79401933	146846	15	84	4	-4.36628	2.61323	RAD21
chr14	104544279	104544700	chr14	104597322	104597553	52622	42	14	4	-3.60414	2.72161	RAD21
chr6	24283128	24283756	chr6	24389634	24389783	105878	52	22	4	-4.2697	2.51327	RAD21
chr1	100274140	100274732	chr1	101333898	101334330	1059166	67	62	4	-5.55924	2.08621	RAD21
chr10	70997185	70997827	chr10	71152239	71152668	154412	125	101	18	-3.66269	3.28576	RAD21
chr10	70997185	70997827	chr10	71172937	71173301	175110	125	69	9	-4.66797	2.42933	RAD21
chr1	247070891	247071102	chr1	247123358	247123758	52256	21	29	3	-4.21459	2.17871	RAD21
chr1	180502520	180503244	chr1	180600880	180601247	97636	130	58	8	-4.76909	1.98952	RAD21
chr1	32129389	32129816	chr1	32211162	32211666	81346	88	67	9	-4.28758	2.32714	RAD21
chr6	74564745	74565012	chr6	75914020	75914272	1349008	32	32	3	-4.73425	2.70755	RAD21
chr6	13336765	13337108	chr6	13538233	13538657	201125	68	61	5	-5.11151	2.10737	RAD21
chr16	19918850	19919159	chr16	20311854	20312081	392695	43	29	5	-3.90962	3.41567	RAD21
chr11	95276014	95276283	chr11	95438589	95439167	162306	38	140	7	-4.68741	2.36541	RAD21
chr10	72972176	72972530	chr10	73028222	73028423	55692	70	54	13	-3.10758	3.19811	RAD21
chr10	72972176	72972530	chr10	73030156	73030383	57626	70	51	9	-3.78587	2.60991	RAD21
chr10	72972176	72972530	chr10	73026195	73026339	53665	70	41	7	-4.07025	2.31834	RAD21
chr14	62361287	62361470	chr14	62593642	62593938	232172	15	27	4	-3.2313	3.87718	RAD21
chr16	89766402	89766806	chr16	89927155	89927648	160349	71	81	8	-4.49825	2.53248	RAD21
chr15	45333811	45334015	chr15	45410297	45410752	76282	15	60	5	-3.58352	2.94826	RAD21
chr13	27948771	27949167	chr13	28558416	28558745	609249	55	38	4	-4.87233	2.6603	RAD21
chr13	27948771	27949167	chr13	28400503	28401015	451336	55	57	7	-4.15856	3.22489	RAD21
chr15	96900077	96900657	chr15	97006085	97006352	105428	49	29	4	-4.48653	2.30682	RAD21
chr17	75092644	75093282	chr17	75243061	75243550	149779	47	78	6	-4.62334	2.38398	RAD21
chr5	78316921	78317253	chr5	78760491	78760843	443238	56	59	5	-4.88401	2.61201	RAD21
chr13	32955805	32955992	chr13	33112929	33113304	156937	16	36	4	-3.58352	3.36518	RAD21
chr19	12827632	12828063	chr19	12907160	12907640	79097	41	75	6	-4.44754	2.16242	RAD21
chr10	61858915	61859143	chr10	62194145	62194578	335002	66	89	7	-4.78647	2.65774	RAD21
chr8	67837702	67837822	chr8	67976428	67976724	138606	44	48	5	-4.43651	2.52017	RAD21
chr9	124497390	124497537	chr9	124754840	124755268	257303	18	94	4	-4.66108	2.65369	RAD21
chr17	47957878	47958277	chr17	48073938	48074290	115661	58	139	12	-4.0251	2.80052	RAD21
chr8	101271203	101271492	chr8	101552885	101553437	281393	54	110	5	-5.47059	1.98371	RAD21
chr8	101271203	101271492	chr8	101539086	101539454	267594	54	42	6	-4.14313	3.13539	RAD21
chr20	45903281	45903422	chr20	46249692	46250365	346270	33	98	4	-5.30889	2.20762	RAD21
chr1	35916709	35916970	chr1	36240175	36240573	323205	73	70	5	-5.32008	2.1819	RAD21
chr11	72542554	72542962	chr11	72889051	72889449	346089	60	84	10	-3.91999	3.41016	RAD21
chr5	139619513	139619737	chr5	139737167	139737594	117430	60	76	8	-4.26619	2.58343	RAD21
chr6	42931362	42932061	chr6	43111057	43112016	178996	89	238	13	-4.83101	2.29323	RAD21
chr6	42931362	42932061	chr6	43097527	43097902	165466	89	151	9	-5.11147	1.98716	RAD21
chr20	42843751	42843995	chr20	43015183	43015491	171188	45	82	5	-4.99451	2.11613	RAD21
chr6	49499753	49500190	chr6	49817168	49817606	316978	90	94	11	-4.24731	3.11482	RAD21
chr20	52195265	52195929	chr20	52556352	52556834	360423	100	97	9	-4.78543	2.66021	RAD21
chr20	52195265	52195929	chr20	52486148	52486909	290219	100	67	9	-4.41541	2.93361	RAD21
chr5	148113147	148113446	chr5	148382672	148382803	269226	89	17	3	-5.12463	2.26596	RAD21
chr14	35684344	35684587	chr14	35875831	35876487	191244	22	111	6	-4.21705	2.89246	RAD21
chr7	27235855	27236208	chr7	28136315	28136566	900107	68	35	3	-5.57763	2.09007	RAD21
chr7	27235855	27236208	chr7	28059839	28060280	823631	68	69	4	-5.68103	2.0162	RAD21
chr7	27235855	27236208	chr7	27960836	27961197	724628	68	55	10	-3.62167	3.68216	RAD21
chr8	135489122	135489318	chr8	135697835	135698180	208517	33	78	6	-4.2697	2.88796	RAD21
chr6	4313172	4313483	chr6	4957771	4958118	644288	45	37	3	-5.22036	2.37982	RAD21
chr7	149366376	149366594	chr7	149439179	149439685	72585	34	106	6	-4.60628	1.97043	RAD21
chr19	3986197	3986592	chr19	4204477	4204860	217885	93	59	13	-3.48024	3.62185	RAD21
chr5	135313163	135313535	chr5	135509791	135510114	196256	27	20	3	-4.09434	3.01766	RAD21
chr1	59250728	59251128	chr1	59573724	59573942	322596	96	22	3	-5.45817	2.06037	RAD21
chr7	100201750	100202617	chr7	100289650	100289920	87033	87	202	15	-4.35808	2.30093	RAD21
chr17	38518892	38519174	chr17	38689215	38690239	170041	71	160	9	-4.9434	2.1588	RAD21
chrX	129709838	129710135	chrX	130050777	130051131	340642	30	81	4	-5.02306	2.45402	RAD21
chr1	23000535	23001023	chr1	23188631	23188890	187608	46	28	3	-4.96362	2.20116	RAD21
chr1	23000535	23001023	chr1	23058430	23058596	57407	46	9	3	-3.82864	2.56921	RAD21
chr17	3817179	3817557	chr17	3907803	3908315	90246	58	61	10	-3.56615	3.06504	RAD21
chr13	99921956	99922210	chr13	100089165	100089490	166955	38	43	5	-4.17991	2.84891	RAD21
chr20	62169172	62170003	chr20	62605230	62605574	435227	119	76	7	-5.21804	2.32663	RAD21
chr9	104211426	104211918	chr9	104292383	104292695	80465	63	54	6	-4.5486	2.07741	RAD21
chr18	55710737	55711162	chr18	55789102	55789445	77940	82	79	16	-3.23099	3.28906	RAD21
chr7	103213753	103214565	chr7	103797225	103797595	582660	144	98	14	-4.27667	3.14764	RAD21
chr10	113899928	113900215	chr10	114067692	114067947	167477	32	25	3	-4.48739	2.56822	RAD21
chr3	194722714	194723113	chr3	194979951	194981178	256838	67	199	12	-4.52818	2.77118	RAD21
chr5	125689633	125690141	chr5	125874852	125875208	184711	76	112	17	-3.38281	3.63407	RAD21
chr13	50571380	50571874	chr13	51375850	51376042	803976	45	57	3	-5.65249	2.04015	RAD21
chr16	2346594	2347082	chr16	2473067	2473422	125985	51	60	5	-4.80729	2.12042	RAD21
chr19	5523216	5523406	chr19	5687122	5687403	163716	9	33	3	-3.49651	3.46639	RAD21
chr22	31485199	31485434	chr22	31544828	31545406	59394	44	78	9	-3.74645	2.66281	RAD21
chr5	156755482	156755750	chr5	156898821	156899039	143071	57	36	6	-4.04305	2.90071	RAD21
chr5	156755482	156755750	chr5	156903917	156904377	148167	57	74	7	-4.4553	2.53485	RAD21
chr6	136353307	136353427	chr6	136546976	136547685	193549	18	147	4	-5.10822	2.08848	RAD21
chr11	67843934	67844117	chr11	67973687	67973867	129570	22	28	4	-3.65066	3.22412	RAD21
chr3	141573724	141573902	chr3	141632105	141632364	58203	18	43	4	-3.87898	2.53139	RAD21
chr1	167684098	167684555	chr1	167772465	167773003	87910	101	100	10	-4.61512	2.06664	RAD21
chr19	44174278	44174686	chr19	44227691	44227991	53005	87	50	11	-3.58214	2.74501	RAD21
chr22	24819712	24819958	chr22	24899151	24899384	79193	41	40	7	-3.51063	3.0373	RAD21
chr1	1891400	1891858	chr1	1969144	1969271	77286	99	9	3	-4.59512	2.01244	RAD21
chr2	113357555	113358162	chr2	113484229	113484651	126067	109	241	34	-3.12342	3.70316	RAD21
chr2	113357555	113358162	chr2	113482532	113482716	124370	109	124	17	-3.8452	3.01635	RAD21
chr2	183649407	183649853	chr2	183844830	183845128	194977	40	47	4	-4.76644	2.40347	RAD21
chr10	89620002	89620181	chr10	89874172	89874401	253991	45	46	7	-3.74348	3.46508	RAD21
chr11	61582757	61583011	chr11	61637884	61638197	54873	49	167	11	-4.21402	2.20064	RAD21
chr11	61582757	61583011	chr11	61637358	61637861	54347	49	143	11	-4.05887	2.33444	RAD21
chr11	6732933	6733053	chr11	6778674	6779037	45621	8	77	3	-4.22602	2.11103	RAD21
chr16	57973596	57973768	chr16	58028672	58028976	54904	19	34	4	-3.69821	2.66128	RAD21
chr6	109848159	109848646	chr6	110104516	110104799	255870	59	62	5	-4.9858	2.36102	RAD21
chr6	109848159	109848646	chr6	110712007	110712405	863361	59	79	4	-5.6744	2.01791	RAD21
chr11	32395716	32396120	chr11	32636938	32637319	240818	42	41	3	-5.25402	2.08575	RAD21
chr19	34611915	34612251	chr19	34709284	34709449	97033	24	24	3	-4.15888	2.55719	RAD21
chr1	10437389	10437764	chr1	10488048	10488403	50284	80	96	19	-3.0575	3.1753	RAD21
chr11	554890	555214	chr11	727953	728321	172739	34	78	5	-4.66419	2.42462	RAD21
chr9	110001884	110002134	chr9	110103543	110103747	101409	25	24	3	-4.19971	2.54966	RAD21
chr11	76903107	76903362	chr11	77259252	77259677	355890	49	50	4	-5.03125	2.44859	RAD21
chr12	104458189	104458374	chr12	104565785	104565995	107411	33	35	3	-4.85463	1.97293	RAD21
chr1	176768598	176768754	chr1	176847943	176848126	79189	14	59	3	-4.51937	2.09602	RAD21
chr1	176768598	176768754	chr1	176849878	176850568	81124	14	161	5	-4.50159	2.12577	RAD21
chr1	172929689	172929871	chr1	173171514	173171931	241643	12	61	4	-3.82319	3.36755	RAD21
chr11	9298013	9298416	chr11	9528214	9528713	229798	20	60	4	-4.31749	2.89741	RAD21
chr8	106104566	106105040	chr8	106421589	106421709	316549	55	59	9	-3.69042	3.60275	RAD21
chr8	106104566	106105040	chr8	106421388	106421556	316348	55	50	9	-3.52491	3.74773	RAD21
chr8	106104566	106105040	chr8	106421059	106421354	316019	55	50	9	-3.52491	3.74748	RAD21
chr2	64978456	64978876	chr2	65058571	65059206	79695	102	85	10	-4.46245	2.15258	RAD21
chr2	64978456	64978876	chr2	65092486	65093011	113610	102	147	11	-4.81961	2.04165	RAD21
chr2	64978456	64978876	chr2	65093154	65093317	114278	102	155	11	-4.87261	1.99555	RAD21
chr22	31607973	31608495	chr22	31688402	31688642	79907	41	22	3	-4.60739	2.01875	RAD21
chr15	52273778	52274139	chr15	52432073	52432430	157934	84	74	8	-4.576	2.45241	RAD21
chrX	129066112	129066468	chrX	129116926	129117187	50458	61	99	14	-3.42788	2.85311	RAD21
chrX	129066112	129066468	chrX	129116275	129116836	49807	61	71	12	-3.40374	2.86637	RAD21
chr2	238380217	238380391	chr2	238480576	238481170	100185	21	73	7	-3.44316	3.25083	RAD21
chr1	22746982	22747318	chr1	22968506	22968823	221188	113	102	35	-2.24166	4.74378	RAD21
chr4	100732963	100733262	chr4	100806261	100806557	72999	53	43	8	-3.57261	2.9339	RAD21
chr7	154982274	154982836	chr7	155137372	155138196	154536	148	176	30	-3.3653	3.56093	RAD21
chr7	99241218	99241363	chr7	99435503	99435937	194140	17	113	4	-4.78801	2.38143	RAD21
chr11	69796762	69796948	chr11	69924575	69924775	127627	113	36	17	-2.64448	4.16038	RAD21
chr11	69796762	69796948	chr11	69929014	69929222	132066	113	23	5	-4.64401	2.30275	RAD21
chr6	108864455	108864706	chr6	109159381	109159534	294675	183	27	8	-4.34644	3.001	RAD21
chr6	108864455	108864706	chr6	109156356	109156744	291650	183	64	16	-3.82319	3.45932	RAD21
chr6	108864455	108864706	chr6	109214561	109214896	349855	183	46	13	-3.90823	3.41871	RAD21
chr6	108864455	108864706	chr6	109103454	109103889	238748	183	120	25	-3.55923	3.59746	RAD21
chr17	62141121	62141474	chr17	62211008	62211392	69534	57	86	12	-3.52759	2.94914	RAD21
chr17	62141121	62141474	chr17	62207405	62207821	65931	57	101	12	-3.68836	2.77278	RAD21
chr22	30682878	30683088	chr22	30783091	30783211	100003	71	58	17	-2.6567	3.98722	RAD21
chr1	99992746	99992972	chr1	100113574	100113926	120602	29	35	3	-4.72542	2.16869	RAD21
chr22	51014429	51015076	chr22	51058890	51059116	43814	77	46	13	-3.04255	3.08912	RAD21
chr3	49878668	49878934	chr3	49937343	49937599	58409	39	29	7	-3.13904	3.2026	RAD21
chr4	173933351	173933490	chr4	174178923	174179269	245433	78	69	6	-5.0073	2.31766	RAD21
chr1	180605332	180605509	chr1	180832117	180832719	226608	52	173	9	-4.71009	2.53691	RAD21
chr6	71257139	71257332	chr6	71396230	71396598	138898	20	38	5	-3.41444	3.47524	RAD21
chr11	34608267	34608406	chr11	34911737	34911963	303331	159	117	38	-2.55591	4.58923	RAD21
chr11	34608267	34608406	chr11	34891118	34891249	282712	159	9	3	-5.0689	2.34224	RAD21
chr11	34608267	34608406	chr11	34877237	34877710	268831	159	32	12	-3.56483	3.65181	RAD21
chr11	34608267	34608406	chr11	34812232	34812412	203826	159	26	5	-5.10812	2.11772	RAD21
chr11	34608267	34608406	chr11	34675644	34675876	67238	159	64	16	-3.68261	2.78824	RAD21
chr18	48346301	48346716	chr18	48393247	48393470	46531	76	29	8	-3.53915	2.70773	RAD21
chr11	34608267	34608406	chr11	34912291	34912711	303885	159	148	42	-2.59078	4.55893	RAD21
chr19	10514124	10514457	chr19	10589474	10589921	75017	98	51	9	-4.12234	2.43727	RAD21
chr4	6550351	6550560	chr4	6682970	6683187	132410	33	53	7	-3.57498	3.30674	RAD21
chr4	6550351	6550560	chr4	6683279	6683420	132719	33	53	7	-3.57498	3.30784	RAD21
chr4	128704075	128704229	chr4	128886357	128886555	182128	49	28	4	-4.45144	2.65056	RAD21
chr4	128704075	128704229	chr4	128886595	128886791	182366	49	38	4	-4.75682	2.37242	RAD21
chr6	125833870	125834097	chr6	126080218	126080561	246121	18	51	5	-3.60332	3.57377	RAD21
chr15	89900031	89900167	chr15	89973834	89974274	73667	34	56	6	-3.96819	2.5711	RAD21
chr1	183439277	183439605	chr1	183592282	183592831	152677	60	55	7	-4.20986	2.77529	RAD21
chr19	35844770	35844941	chr19	35986293	35986593	141352	155	47	13	-3.76367	3.15577	RAD21
chr19	35844770	35844941	chr19	35953696	35953841	108755	155	22	9	-3.74002	3.02851	RAD21
chr19	35844770	35844941	chr19	35959630	35959926	114689	155	61	18	-3.37356	3.40799	RAD21
chr2	43506442	43506914	chr2	43711249	43711778	204335	37	109	7	-4.41045	2.75075	RAD21
chr16	25066833	25067237	chr16	25138496	25138647	71259	49	52	5	-4.62419	1.94508	RAD21
chr1	209817026	209817165	chr1	209866181	209866618	49016	27	156	8	-4.18681	2.17548	RAD21
chr13	103232920	103233281	chr13	103522969	103523327	289688	37	22	3	-4.50474	2.85379	RAD21
chr17	7259378	7259681	chr17	7319756	7319903	60075	45	15	3	-4.31749	2.14993	RAD21
chr21	35445536	35445954	chr21	35574266	35574528	128312	59	30	4	-4.70615	2.22714	RAD21
chr6	34494818	34495286	chr6	34577286	34577653	82000	88	129	12	-4.36734	2.25712	RAD21
chr2	148695286	148695723	chr2	149266937	149267361	571214	44	54	4	-5.00058	2.55024	RAD21
chr11	43665547	43665877	chr11	43730262	43730614	64385	22	38	3	-4.5314	1.98543	RAD21
chr12	27006600	27007022	chr12	27167239	27167652	160217	41	86	10	-3.56275	3.394	RAD21
chr16	80561319	80561496	chr16	80858770	80858966	297274	56	18	3	-4.7185	2.67609	RAD21
chr20	43313761	43314268	chr20	43361922	43362437	47654	122	68	19	-3.13465	3.07102	RAD21
chr20	43313761	43314268	chr20	43496301	43496578	182033	122	55	8	-4.65247	2.46662	RAD21
chr20	60985287	60985520	chr20	61071423	61072010	85903	70	103	27	-2.29155	4.22672	RAD21
chr4	9764756	9765144	chr4	9900327	9900590	135183	54	23	5	-3.9056	3.0061	RAD21
chr19	6166038	6166307	chr19	6412466	6412688	246159	56	25	3	-5.047	2.28392	RAD21
chr14	55031689	55032110	chr14	55240609	55241072	208499	128	210	42	-2.7238	4.28519	RAD21
chr14	55031689	55032110	chr14	55158309	55158660	126199	128	40	7	-4.64909	2.27018	RAD21
chr1	211854031	211854527	chr1	212208074	212208835	353547	82	155	8	-5.29126	2.22424	RAD21
chr6	35490644	35491038	chr6	35725319	35725518	234281	74	23	3	-5.24233	2.07943	RAD21
chr6	35490644	35491038	chr6	35705164	35705707	214126	74	300	15	-4.59175	2.61087	RAD21
chr5	140718156	140718408	chr5	140904374	140904672	185966	22	60	3	-4.98816	2.17333	RAD21
chr15	76108233	76108430	chr15	76214178	76214504	105748	26	39	4	-4.14907	2.62581	RAD21
chr1	181706200	181706525	chr1	181906466	181906688	199941	31	84	4	-5.09222	2.12161	RAD21
chr1	181706200	181706525	chr1	181898594	181898746	192069	31	11	3	-3.63466	3.42479	RAD21
chr1	181706200	181706525	chr1	181906072	181906416	199547	31	72	4	-4.93806	2.26036	RAD21
chr15	34516965	34517268	chr15	34659383	34660163	142115	28	84	6	-4.1795	2.77066	RAD21
chr18	3012448	3012694	chr18	3129325	3129627	116631	61	48	5	-4.7632	2.11151	RAD21
chr11	123979354	123979515	chr11	124065720	124066287	86205	61	52	10	-3.45695	3.13833	RAD21
chr10	16994692	16994999	chr10	17272482	17272931	277483	38	93	4	-5.3976	2.04057	RAD21
chr7	95025406	95025591	chr7	95108077	95108339	82486	34	42	4	-4.49144	2.14446	RAD21
chr7	14028954	14029137	chr7	14497529	14497838	468392	49	22	3	-4.78564	2.70643	RAD21
chr4	103266644	103266849	chr4	103352550	103352915	85701	40	97	8	-4.10471	2.52852	RAD21
chr2	161285843	161286072	chr2	161826839	161827020	540767	17	13	3	-3.20094	4.03624	RAD21
chr5	75699602	75700089	chr5	75840238	75840478	140149	130	77	16	-3.66616	3.24346	RAD21
chr17	3819781	3819936	chr17	3907803	3908315	87867	18	61	6	-3.41773	3.18701	RAD21
chr15	90039543	90039689	chr15	90099983	90100235	60294	19	18	3	-3.63759	2.77046	RAD21
chr5	36739790	36740258	chr5	36870518	36870889	130260	74	86	12	-3.7886	3.09765	RAD21
chr17	55969897	55970282	chr17	56072853	56073093	102571	40	73	6	-4.39582	2.37352	RAD21
chr17	32526886	32527448	chr17	32633430	32633756	105982	99	34	8	-3.9626	2.80244	RAD21
chr5	148520907	148521307	chr5	148644328	148644547	123021	48	49	5	-4.54415	2.35222	RAD21
chr5	148520907	148521307	chr5	148608635	148608886	87328	48	55	6	-4.29502	2.36206	RAD21
chr5	148520907	148521307	chr5	148617342	148617487	96035	48	37	6	-3.8986	2.79404	RAD21
chr3	195586203	195586574	chr3	195641802	195642210	55228	63	54	8	-3.97324	2.4188	RAD21
chr1	8035288	8035803	chr1	8409033	8409465	373230	52	144	6	-5.33754	2.1914	RAD21
chr1	202153797	202154121	chr1	202688307	202688448	534186	31	80	3	-5.61879	2.03332	RAD21
chr5	133519907	133520294	chr5	133624986	133625697	104692	87	179	42	-2.17795	4.47061	RAD21
chr1	84907841	84908293	chr1	85063795	85063950	155502	53	17	3	-4.60628	2.4168	RAD21
chr15	75335837	75336258	chr15	75494402	75494588	158144	115	115	19	-3.60099	3.35237	RAD21
chr14	23455784	23456189	chr14	23525405	23525626	69216	150	95	17	-3.89809	2.60379	RAD21
chr1	84907841	84908293	chr1	85007410	85007665	99117	53	25	6	-3.60565	3.09068	RAD21
chr5	121427743	121427979	chr5	121492414	121492755	64435	28	42	5	-3.851	2.61126	RAD21
chr7	100066918	100067238	chr7	100157458	100157710	90220	84	159	12	-4.52991	2.16292	RAD21
chr5	159626270	159626717	chr5	159772266	159772708	145549	56	99	12	-3.65066	3.27392	RAD21
chr4	10174991	10175318	chr4	10405012	10405706	229694	65	218	9	-5.16443	2.13713	RAD21
chr1	119829216	119829565	chr1	119910069	119910452	80504	31	40	6	-3.53935	3.01991	RAD21
chr12	64943346	64943791	chr12	65002689	65002936	58898	60	88	17	-2.90525	3.42016	RAD21
chr3	45085175	45085629	chr3	45212921	45213146	127292	92	64	8	-4.52179	2.39529	RAD21
chr3	45085175	45085629	chr3	45252038	45252371	166409	92	85	8	-4.80556	2.27195	RAD21
chr2	72997807	72998435	chr2	73086830	73087173	88395	80	41	12	-3.12579	3.46401	RAD21
chr1	91977043	91977306	chr1	92393370	92393579	416064	25	79	5	-4.36945	3.03144	RAD21
chr11	61665172	61665412	chr11	61715067	61715443	49655	161	169	32	-3.27983	2.97263	RAD21
chr2	175636354	175636610	chr2	175850468	175850725	213858	37	28	4	-4.17053	2.99013	RAD21
chr11	120206812	120207027	chr11	120381782	120382186	174755	73	66	8	-4.32123	2.74577	RAD21
chr4	140577780	140577988	chr4	140682640	140682860	104652	44	26	4	-4.2697	2.50562	RAD21
chr21	33775506	33775899	chr21	33973168	33973586	197269	38	58	5	-4.47915	2.67078	RAD21
chr4	83384251	83384402	chr4	83660472	83660780	276070	76	36	9	-3.5198	3.70418	RAD21
chr3	184788380	184788593	chr3	184894421	184894562	105828	38	64	7	-3.90465	2.85592	RAD21
chr3	184788380	184788593	chr3	184893724	184893876	105131	38	60	7	-3.84011	2.9122	RAD21
chr7	137340998	137341472	chr7	137693454	137693842	351982	65	180	7	-5.47552	2.06494	RAD21
chr5	94979944	94980426	chr5	95182714	95183118	202288	108	139	15	-4.2005	2.93605	RAD21
chr5	94979944	94980426	chr5	95178592	95179281	198166	108	149	13	-4.55618	2.60322	RAD21
chr3	25688736	25689023	chr3	25898420	25898799	209397	41	41	4	-4.65456	2.54228	RAD21
chr9	103476962	103477241	chr9	104073962	104074277	596721	21	58	7	-3.21315	4.02217	RAD21
chr9	103476962	103477241	chr9	104073780	104073929	596539	21	50	7	-3.06473	4.14414	RAD21
chr12	71610767	71611293	chr12	71809451	71809815	198158	71	36	7	-3.95438	3.14947	RAD21
chr12	71610767	71611293	chr12	71786398	71786828	175105	71	48	9	-3.73943	3.27983	RAD21
chr15	78600752	78601173	chr15	78715261	78715490	114088	62	38	5	-4.54584	2.30186	RAD21
chrX	106902983	106903283	chrX	107019018	107019246	115735	23	84	4	-4.79372	2.07786	RAD21
chr10	82459169	82459758	chr10	82621679	82622098	161921	97	60	21	-2.58001	4.30445	RAD21
chr12	52766411	52766728	chr12	53273261	53274027	506533	33	116	5	-5.03122	2.51446	RAD21
chr1	221717055	221717543	chr1	221916035	221916412	198492	40	95	9	-3.84831	3.24654	RAD21
chr1	221717055	221717543	chr1	221915275	221915795	197732	40	89	9	-3.78307	3.30397	RAD21
chr17	36833197	36833792	chr17	36890209	36890343	56417	100	84	28	-2.37158	3.86781	RAD21
chr12	54645534	54646114	chr12	54754465	54754934	108351	38	179	8	-4.66609	2.15569	RAD21
chr1	204415581	204415804	chr1	204472221	204472647	56417	91	158	17	-3.90703	2.48921	RAD21
chr19	30251049	30251331	chr19	30364333	30364889	113002	14	104	6	-3.69993	3.09133	RAD21
chr2	7057362	7057609	chr2	7184318	7184807	126709	44	49	5	-4.45713	2.45312	RAD21
chr10	30681497	30681863	chr10	30823108	30823290	141245	61	69	8	-4.1861	2.76183	RAD21
chr3	133657670	133657794	chr3	133930768	133930956	272974	13	48	5	-3.21727	3.96762	RAD21
chr3	133657670	133657794	chr3	133931774	133932081	273980	13	54	5	-3.33506	3.86468	RAD21
chr18	77140878	77141192	chr18	77288647	77289119	147455	59	65	10	-3.64675	3.28334	RAD21
chr6	49590851	49591095	chr6	49817168	49817606	226073	40	94	6	-4.64866	2.59072	RAD21
chr5	77162981	77163386	chr5	77277780	77277905	114394	42	20	3	-4.53618	2.31267	RAD21
chr12	68616937	68617384	chr12	68710881	68711241	93497	64	67	15	-2.94748	3.66683	RAD21
chr4	39979202	39979914	chr4	40057469	40057640	77555	163	106	13	-4.62729	1.98426	RAD21
chr10	70229837	70230034	chr10	70287145	70287473	57111	26	26	4	-3.7436	2.64289	RAD21
chr2	102680781	102681038	chr2	102844272	102844399	163234	37	26	3	-4.67179	2.38321	RAD21
chr2	36579247	36579521	chr2	36891314	36891698	311793	24	29	4	-3.77276	3.52623	RAD21
chr1	201978619	201979100	chr1	202087215	202087425	108115	176	147	48	-2.41851	4.26661	RAD21
chr17	26821683	26822078	chr17	26940252	26940616	118174	73	54	7	-4.38762	2.47324	RAD21
chr7	131373888	131374276	chr7	131734602	131734723	360326	83	20	3	-5.21735	2.28902	RAD21
chr5	140044176	140044540	chr5	140090565	140091196	46025	35	42	5	-4.07414	2.24438	RAD21
chr1	171770601	171771001	chr1	171954906	171955038	183905	51	36	4	-4.74276	2.39038	RAD21
chr12	7869068	7869293	chr12	7959431	7959827	90138	14	54	5	-3.40917	3.21119	RAD21
chr1	156771202	156771405	chr1	156829738	156830392	58333	30	102	6	-4.44265	2.02291	RAD21
chr18	46303394	46303824	chr18	46423234	46423770	119410	83	51	9	-3.95622	2.88573	RAD21
chr12	9901365	9901543	chr12	10292687	10292898	391144	31	24	3	-4.41482	2.98601	RAD21
chr12	54426273	54426846	chr12	54528794	54529043	101948	118	35	11	-3.53024	3.18175	RAD21
chr1	247536099	247536335	chr1	247650444	247650702	114109	35	54	6	-3.96081	2.85226	RAD21
chr10	73246268	73246570	chr10	73329816	73330191	83246	41	61	5	-4.60557	2.04289	RAD21
chr22	50323253	50323566	chr22	50431866	50432115	108300	119	21	5	-4.60477	2.21302	RAD21
chr11	119076820	119077006	chr11	119155341	119155626	78335	70	53	8	-4.0599	2.51878	RAD21
chr1	185782608	185782819	chr1	186181597	186182247	398778	19	85	6	-3.80357	3.5064	RAD21
chr17	48474741	48475050	chr17	48556061	48556508	81011	45	119	12	-3.61597	2.952	RAD21
chr5	139012943	139013285	chr5	139145098	139145769	131813	95	112	12	-4.30256	2.62198	RAD21
chr12	12234785	12235108	chr12	12480802	12481113	245694	24	30	6	-2.99573	4.11579	RAD21
chr2	26395918	26396038	chr2	26692002	26692321	295964	50	72	5	-4.96981	2.45235	RAD21
chr14	34800949	34801205	chr14	34968064	34968265	166859	27	12	3	-3.58352	3.39664	RAD21
chr17	72364443	72364774	chr17	72453500	72454168	88726	34	147	7	-4.62497	2.06327	RAD21
chr11	407350	407475	chr11	451009	451214	43534	35	40	5	-4.02535	2.26025	RAD21
chr6	4164272	4164628	chr6	4210896	4211252	46268	62	68	12	-3.37683	2.84315	RAD21
chr1	203830473	203830786	chr1	204097994	204098449	267208	79	160	21	-3.35558	3.83511	RAD21
chr1	203830473	203830786	chr1	204096845	204097072	266059	79	136	17	-3.61568	3.6018	RAD21
chrX	150321716	150321870	chrX	150849367	150849638	527497	48	62	7	-4.10652	3.2858	RAD21
chr12	95977778	95977959	chr12	96209456	96209674	231497	21	27	4	-3.56777	3.57395	RAD21
chr1	15655336	15655902	chr1	15757474	15757964	101572	56	95	8	-4.42035	2.34372	RAD21
chr1	15655336	15655902	chr1	15771039	15771294	115137	56	18	3	-4.7185	2.14531	RAD21
chr17	76356784	76357205	chr17	76418005	76418516	60800	126	115	19	-3.69234	2.72544	RAD21
chr2	71775794	71776148	chr2	72025495	72025763	249347	53	60	6	-4.48112	2.79676	RAD21
chr1	87597005	87597257	chr1	87758694	87759086	161437	67	39	4	-5.09567	1.98621	RAD21
chr6	90081831	90082057	chr6	90307690	90308018	225633	34	48	3	-5.20034	2.09391	RAD21
chr4	10188374	10188718	chr4	10239888	10240042	51170	89	28	6	-4.23732	2.1498	RAD21
chr18	32606398	32606825	chr18	32723853	32724293	117028	80	105	26	-2.51979	4.22418	RAD21
chr1	67998138	67998447	chr1	68225691	68226343	227244	64	190	17	-3.73948	3.4102	RAD21
chr1	67998138	67998447	chr1	68227505	68227693	229058	64	164	15	-3.84265	3.32178	RAD21
chr9	103364734	103364943	chr9	104073962	104074277	709019	23	58	3	-4.99871	2.56654	RAD21
chr14	100906413	100907013	chr14	101119666	101120049	212653	82	112	11	-4.32943	2.84385	RAD21
chr6	44445018	44445277	chr6	44561306	44561617	116029	119	10	4	-4.30912	2.53537	RAD21
chr6	44445018	44445277	chr6	44613092	44613311	167815	119	29	7	-4.2546	2.78328	RAD21
chr18	3703585	3704006	chr18	3771399	3771725	67393	53	64	6	-4.54566	1.99241	RAD21
chr16	1413904	1414149	chr16	1463622	1464027	49473	69	54	11	-3.4273	2.8417	RAD21
chr16	1413904	1414149	chr16	1464571	1464795	50422	69	63	11	-3.58145	2.71815	RAD21
chr11	20149882	20150087	chr11	20375068	20375844	224981	43	51	4	-4.92044	2.34366	RAD21
chr3	50311723	50312230	chr3	50361831	50362333	49601	193	93	25	-3.35754	2.90413	RAD21
chr3	50311723	50312230	chr3	50365552	50365773	53322	193	44	10	-4.44171	1.98589	RAD21
chr20	32900309	32900928	chr20	33061161	33061311	160233	96	37	5	-4.95639	2.10991	RAD21
chr1	20901780	20902218	chr1	20959611	20960004	57393	61	50	10	-3.41773	2.93938	RAD21
chr1	20901780	20902218	chr1	20966552	20966956	64334	61	51	9	-3.64825	2.79681	RAD21
chr11	46911134	46911600	chr11	47122945	47123327	211345	73	44	4	-5.30206	1.96254	RAD21
chr14	54976348	54976664	chr14	55030803	55031131	54139	18	96	5	-4.23584	2.17513	RAD21
chr14	23952585	23952732	chr14	24032016	24032379	79284	25	72	6	-3.91202	2.6634	RAD21
chr5	172198188	172198504	chr5	172327934	172328292	129430	184	55	16	-3.67709	3.19868	RAD21
chr5	172198188	172198504	chr5	172329830	172330201	131326	184	117	18	-4.19637	2.71957	RAD21
chr11	76630666	76631185	chr11	76757019	76757674	125834	157	150	23	-3.79589	3.07009	RAD21
chr11	76630666	76631185	chr11	76758045	76758297	126860	157	172	23	-3.93275	2.94655	RAD21
chr8	6116063	6116258	chr8	6658284	6658704	542026	20	67	3	-5.0032	2.5445	RAD21
chr8	67372091	67372289	chr8	67521611	67521848	149322	28	34	4	-4.08598	2.88096	RAD21
chr16	86077872	86078090	chr16	86553608	86554005	475518	28	51	4	-4.49144	2.95522	RAD21
chr5	54240220	54240372	chr5	54442432	54442692	202060	13	42	3	-4.10539	3.0217	RAD21
chr22	36784005	36784225	chr22	36864107	36864285	79882	34	17	3	-4.16235	2.43396	RAD21
chr3	141741178	141741637	chr3	141998857	141999165	257220	67	55	6	-4.62851	2.68255	RAD21
chr11	72435884	72436096	chr11	72504533	72505230	68437	90	90	15	-3.58352	2.88899	RAD21
chr11	72435884	72436096	chr11	72525331	72525570	89235	90	80	10	-4.27667	2.3929	RAD21
chr11	72435884	72436096	chr11	72524035	72524248	87939	90	53	10	-3.86493	2.76897	RAD21
chrX	19035474	19035692	chrX	19352147	19352610	316455	17	73	3	-4.92645	2.51874	RAD21
chr21	43796898	43797128	chr21	43869861	43870364	72733	46	151	14	-3.56781	2.93632	RAD21
chr2	224557133	224557346	chr2	224662873	224663136	105527	11	20	3	-3.1964	3.5194	RAD21
chr14	62646194	62646369	chr14	63743423	63743783	1097054	9	32	5	-2.44408	4.50129	RAD21
chr7	90917483	90917938	chr7	91265386	91265914	347448	69	73	12	-3.55475	3.72562	RAD21
chr6	7899771	7900003	chr6	7992177	7992529	92174	105	77	25	-2.56001	4.02016	RAD21
chr1	23871150	23871687	chr1	23963925	23964291	92238	154	152	45	-2.44751	4.1259	RAD21
chr1	23871150	23871687	chr1	23961505	23961896	89818	154	115	32	-2.85041	3.73184	RAD21
chr16	55746191	55746525	chr16	55876770	55877038	130245	51	73	13	-3.09239	3.75107	RAD21
chr19	33726219	33726528	chr19	33897671	33898050	171143	41	71	8	-3.81737	3.1959	RAD21
chr1	16939841	16940109	chr1	17278101	17278469	337992	73	69	7	-4.63275	2.79251	RAD21
chr11	1903749	1903989	chr11	2021910	2022116	117921	48	106	13	-3.40474	3.39648	RAD21
chr11	1903749	1903989	chr11	2020221	2020368	116232	48	65	6	-4.46207	2.3926	RAD21
chr11	1903749	1903989	chr11	2019670	2019790	115681	48	51	6	-4.21951	2.61775	RAD21
chr3	121265010	121265135	chr3	121977684	121978071	712549	64	27	3	-5.2575	2.35692	RAD21
chr2	241172333	241172653	chr2	241377738	241378034	205085	46	47	18	-1.89805	5.02656	RAD21
chr12	113877277	113877891	chr12	114350431	114350942	472540	70	87	11	-3.91861	3.4333	RAD21
chr12	113877277	113877891	chr12	114256675	114256970	378784	70	16	3	-4.82386	2.6333	RAD21
chrX	154209164	154209682	chrX	154407890	154408174	198208	82	30	6	-4.2244	2.90449	RAD21
chr5	65603256	65603507	chr5	66053104	66053381	449597	68	40	5	-4.68951	2.77856	RAD21
chr5	65603256	65603507	chr5	65794673	65794795	191166	68	8	3	-4.10172	2.99721	RAD21
chr5	135709714	135709957	chr5	136105768	136106110	395811	25	72	7	-3.60372	3.67575	RAD21
chr6	35551596	35552065	chr6	35705164	35705707	153099	130	300	45	-2.95799	3.93462	RAD21
chr1	162847731	162848227	chr1	163144628	163144869	296401	47	23	4	-4.21305	3.12103	RAD21
chr4	40739298	40739515	chr4	40899661	40899924	160146	58	21	4	-4.33238	2.68459	RAD21
chr4	40739298	40739515	chr4	40918935	40919191	179420	58	21	4	-4.33238	2.75062	RAD21
chr7	7142940	7143328	chr7	7221909	7222316	78581	64	69	10	-3.78782	2.77432	RAD21
chr7	7142940	7143328	chr7	7222417	7222562	79089	64	79	10	-3.92316	2.65164	RAD21
chrX	41418866	41419025	chrX	41619055	41619431	200030	65	47	14	-2.74642	4.24954	RAD21
chrX	41418866	41419025	chrX	41593890	41594029	174865	65	22	3	-5.06821	2.06185	RAD21
chr3	4763659	4764176	chr3	5017750	5018117	253574	254	198	39	-3.49848	3.68282	RAD21
chr3	4763659	4764176	chr3	5019269	5019489	255093	254	246	40	-3.66491	3.53741	RAD21
chr3	4763659	4764176	chr3	5021025	5021189	256849	254	189	23	-4.50809	2.78912	RAD21
chr3	4763659	4764176	chr3	5022025	5022346	257849	254	201	16	-5.29546	2.08936	RAD21
chr2	173037239	173037486	chr2	173326848	173327042	289362	66	37	4	-5.02798	2.3904	RAD21
chr2	173037239	173037486	chr2	173330337	173330768	292851	66	70	8	-4.27927	3.05784	RAD21
chr2	173037239	173037486	chr2	173332278	173332429	294792	66	39	4	-5.08063	2.35272	RAD21
chr15	91846093	91846649	chr15	92396443	92396579	549794	62	34	3	-5.45627	2.17091	RAD21
chr17	29886102	29886227	chr17	30169347	30169920	283120	36	82	11	-3.19445	4.00382	RAD21
chr18	13558129	13558361	chr18	13630210	13630452	71849	24	29	5	-3.32647	3.15353	RAD21
chr18	13558129	13558361	chr18	13813205	13813585	254844	24	16	4	-3.17805	3.97117	RAD21
chr14	77339233	77339464	chr14	77617731	77617993	278267	43	54	6	-4.16667	3.13403	RAD21
chr3	32060581	32061009	chr3	32376205	32376456	315196	83	17	3	-5.05483	2.40459	RAD21
chr7	7463973	7464514	chr7	7580906	7581373	116392	75	46	6	-4.56261	2.2989	RAD21
chr3	50310353	50310812	chr3	50361831	50362333	51019	155	93	19	-3.68715	2.63191	RAD21
chr22	50946496	50946769	chr22	51001179	51001517	54410	53	27	4	-4.49354	1.9478	RAD21
chr2	179660900	179661170	chr2	180615901	180616241	954731	35	29	3	-4.72542	2.75224	RAD21
chr19	41859780	41860169	chr19	41937425	41937700	77256	62	52	6	-4.49486	2.10571	RAD21
chr12	48477949	48478215	chr12	48558852	48559326	80637	38	51	13	-2.43951	4.04774	RAD21
chr12	6444859	6445231	chr12	6574689	6574949	129458	37	64	6	-4.18628	2.72075	RAD21
chr12	6444859	6445231	chr12	6493211	6493349	47980	37	17	4	-3.67154	2.61162	RAD21
chr5	150381686	150382119	chr5	150494612	150495357	112493	69	190	16	-3.93595	2.86641	RAD21
chr5	150381686	150382119	chr5	150495492	150495810	113373	69	223	16	-4.0961	2.72084	RAD21
chr8	126131309	126131796	chr8	126656756	126657079	524960	167	55	8	-4.96644	2.57226	RAD21
chr16	27166411	27166607	chr16	27379256	27379828	212649	16	70	4	-4.2485	2.91689	RAD21
chr15	101829197	101829464	chr15	102181313	102181918	351849	30	70	3	-5.45247	2.08481	RAD21
chr13	100887562	100887792	chr13	101166982	101167417	279190	50	44	4	-4.92362	2.46436	RAD21
chr7	91053809	91054009	chr7	91265386	91265914	211377	25	73	3	-5.31211	1.95355	RAD21
chr12	47426259	47426921	chr12	48080485	48080719	653564	48	38	3	-5.31156	2.30661	RAD21
chr1	182053591	182054350	chr1	182365538	182366451	311188	125	269	26	-3.90683	3.40786	RAD21
chr12	72174069	72174400	chr12	72240221	72240385	65821	46	12	4	-3.54096	2.90772	RAD21
chr3	133553103	133553361	chr3	133646447	133646716	93086	24	42	3	-4.7185	2.00639	RAD21
chr10	82204346	82204879	chr10	82265288	82265731	60409	213	177	89	-1.56017	4.66308	RAD21
chr10	82204346	82204879	chr10	82263797	82264264	58918	213	216	96	-1.60787	4.59598	RAD21
chr10	43789018	43789289	chr10	43843892	43844296	54603	54	63	11	-3.33633	2.98085	RAD21
chr2	42322969	42323613	chr2	42466029	42466180	142416	67	37	6	-4.23209	2.72264	RAD21
chr3	186332677	186332932	chr3	186539277	186539502	206345	66	44	6	-4.39033	2.77376	RAD21
chr15	91361499	91361671	chr15	91429048	91429671	67377	17	87	5	-4.08025	2.4221	RAD21
chr3	133916467	133916883	chr3	134097164	134097485	180281	33	34	3	-4.82564	2.30251	RAD21
chr2	169203155	169203720	chr2	169562090	169562399	358370	129	41	8	-4.4145	2.97931	RAD21
chr2	169203155	169203720	chr2	169543977	169544155	340257	129	46	7	-4.79663	2.65056	RAD21
chr8	10405615	10405903	chr8	10697267	10697605	291364	31	96	4	-5.22575	2.21891	RAD21
chr15	50968164	50968347	chr15	51200385	51201000	232038	72	93	9	-4.41482	2.81557	RAD21
chr15	50968164	50968347	chr15	51178080	51178431	209733	72	31	4	-4.93806	2.28699	RAD21
chr15	67238959	67239416	chr15	67596076	67596439	356660	126	89	19	-3.43604	3.8221	RAD21
chr16	88878674	88878997	chr16	89233799	89234162	354802	81	119	13	-4.04367	3.29966	RAD21
chr13	22053184	22053363	chr13	22132240	22132441	78877	28	9	3	-3.3322	3.20149	RAD21
chr3	4762406	4762744	chr3	5019269	5019489	256525	197	246	25	-4.35078	2.9287	RAD21
chr3	4762406	4762744	chr3	5017750	5018117	255006	197	198	27	-3.9798	3.25638	RAD21
chr2	202725311	202725632	chr2	203043017	203043425	317385	39	52	6	-4.03129	3.3046	RAD21
chr14	100751678	100751897	chr14	100844159	100844452	92262	24	38	3	-4.61842	2.09442	RAD21
chr19	42637241	42637613	chr19	42924261	42924639	286648	80	25	3	-5.40368	2.05309	RAD21
chr12	55247656	55248279	chr12	55351815	55352161	103536	72	68	10	-3.891	2.85398	RAD21
chr12	55247656	55248279	chr12	55329100	55329405	80821	72	42	6	-4.43082	2.1898	RAD21
chr1	159805987	159806278	chr1	159861347	159861719	55069	33	85	7	-4.04734	2.35115	RAD21
chr10	82213817	82214030	chr10	82265288	82265731	51258	35	177	12	-3.76168	2.56885	RAD21
chr10	82213817	82214030	chr10	82263797	82264264	49767	35	216	12	-3.96081	2.37945	RAD21
chr1	152933223	152933482	chr1	153162936	153163156	229454	27	40	6	-3.4012	3.71887	RAD21
chr19	46784123	46784333	chr19	46898880	46899303	114547	45	91	6	-4.734	2.12743	RAD21
chr6	50783255	50784271	chr6	51215098	51215543	430827	91	34	9	-3.64277	3.65013	RAD21
chr6	159595286	159595778	chr6	160075648	160076094	479870	78	64	9	-4.12114	3.26604	RAD21
chr20	5574222	5574353	chr20	5769005	5769374	194652	21	65	3	-5.02169	2.1705	RAD21
chr10	103362381	103363148	chr10	103543070	103543329	179922	136	62	14	-3.76167	3.27398	RAD21
chr16	4556309	4556737	chr16	4635513	4635714	78776	26	28	3	-4.39308	2.21103	RAD21
chr17	79702858	79703088	chr17	79818886	79819006	115798	35	37	4	-4.39368	2.45454	RAD21
chr8	6282691	6282939	chr8	6429876	6430029	146937	121	40	9	-4.09022	2.86994	RAD21
chr15	66911519	66911825	chr15	67066665	67067097	154840	45	86	5	-5.04213	2.01203	RAD21
chr15	66911519	66911825	chr15	66990788	66990965	78963	45	29	5	-3.95508	2.62098	RAD21
chr11	32334463	32334730	chr11	32814408	32814767	479678	20	61	5	-3.88773	3.46101	RAD21
chr11	32334463	32334730	chr11	32636938	32637319	302208	20	41	3	-4.51208	2.86485	RAD21
chr1	167690295	167690508	chr1	167772465	167773003	81957	49	100	12	-3.52718	3.04173	RAD21
chr1	167690295	167690508	chr1	167802017	167802216	111509	49	19	3	-4.63903	2.19954	RAD21
chr17	41323074	41323399	chr17	41392904	41393576	69505	89	47	8	-4.1799	2.34498	RAD21
chr3	64519344	64519637	chr3	65231473	65231639	711836	29	14	3	-3.80913	3.53121	RAD21
chr7	151012219	151012585	chr7	151145521	151146023	132936	58	73	7	-4.45908	2.47969	RAD21
chr3	100789188	100789483	chr3	100914868	100915347	125385	39	61	9	-3.37999	3.45872	RAD21
chr3	9012473	9013036	chr3	9109069	9109338	96033	80	35	5	-4.7185	2.02601	RAD21
chr3	9012473	9013036	chr3	9344233	9344659	331197	80	75	11	-3.90372	3.42549	RAD21
chr17	48475113	48475248	chr17	48556878	48557110	81630	50	160	17	-3.32077	3.23218	RAD21
chr2	102387182	102387468	chr2	102448671	102448915	61203	30	69	6	-4.05178	2.40116	RAD21
chr2	102387182	102387468	chr2	102447781	102447994	60313	30	59	6	-3.89522	2.53616	RAD21
chr2	102387182	102387468	chr2	102448023	102448242	60555	30	61	6	-3.92855	2.50796	RAD21
chr12	28122789	28123426	chr12	28325186	28325695	201760	53	65	9	-3.75023	3.34292	RAD21
chr15	90701159	90701703	chr15	90762791	90763146	61088	67	56	11	-3.43425	2.96358	RAD21
chr15	90701159	90701703	chr15	90764553	90764783	62850	67	57	9	-3.85329	2.59635	RAD21
chr6	133890105	133890526	chr6	134237681	134238027	347155	61	62	12	-3.26819	3.97377	RAD21
chr6	133890105	133890526	chr6	134238067	134238200	347541	61	75	12	-3.45855	3.8088	RAD21
chr4	73192396	73192749	chr4	73885228	73885541	692479	38	49	5	-4.31053	3.12463	RAD21
chr12	49524070	49524394	chr12	49581556	49581862	57162	65	59	8	-4.09304	2.32877	RAD21
chr12	49524070	49524394	chr12	49582712	49582957	58318	65	65	8	-4.18989	2.25135	RAD21
chr12	49524070	49524394	chr12	49582161	49582367	57767	65	69	8	-4.24961	2.1928	RAD21
chr19	18794118	18794314	chr19	18896049	18896290	101735	48	29	4	-4.46591	2.30207	RAD21
chr6	116589737	116590087	chr6	116882498	116882879	292411	54	38	5	-4.40769	2.94371	RAD21
chr1	236272708	236273121	chr1	236695019	236695407	421898	78	24	5	-4.31589	3.07903	RAD21
chr1	236272708	236273121	chr1	236653142	236653475	380021	78	50	5	-5.04986	2.44108	RAD21
chr6	146864559	146864905	chr6	147021281	147021626	156376	40	67	4	-5.12098	1.9443	RAD21
chr14	35609934	35610335	chr14	35882479	35882814	272144	28	48	3	-5.00618	2.37719	RAD21
chr14	35609934	35610335	chr14	35875831	35876487	265496	28	111	6	-4.45822	2.85114	RAD21
chr3	150505575	150505865	chr3	150863752	150864224	357887	38	61	3	-5.55124	2.00129	RAD21
chr2	160031770	160032049	chr2	160568099	160568504	536050	51	99	6	-4.94343	2.59314	RAD21
chr2	160031770	160032049	chr2	160568715	160569091	536666	51	119	6	-5.12743	2.44083	RAD21
chr12	51664206	51664448	chr12	51734877	51735648	70429	105	128	35	-2.39529	4.00537	RAD21
chr1	84907841	84908293	chr1	85237726	85237903	329433	53	68	4	-5.41721	2.10375	RAD21
chr6	154996679	154997207	chr6	155126490	155126860	129283	147	67	13	-4.06523	2.8336	RAD21
chr14	50328551	50328772	chr14	50571536	50571994	242764	66	61	6	-4.71701	2.57077	RAD21
chr5	71462319	71462442	chr5	71565046	71565282	102604	24	35	3	-4.53618	2.24198	RAD21
chrX	69674191	69674921	chrX	69773937	69774254	99016	50	26	5	-3.95124	2.76588	RAD21
chr5	132701016	132701260	chr5	132795897	132796170	94637	31	32	3	-4.7025	2.03166	RAD21
chrX	41135909	41136062	chrX	41619055	41619431	482993	48	47	3	-5.52412	2.09532	RAD21
chr15	29275616	29275983	chr15	29382799	29383007	106816	18	26	4	-3.37588	3.35884	RAD21
chr3	136477384	136477597	chr3	136732661	136733191	255064	12	81	3	-4.68213	2.63006	RAD21
chr17	38269291	38269846	chr17	38324550	38324916	54704	299	115	44	-2.877	3.39166	RAD21
chr3	50408086	50408357	chr3	50579833	50580210	171476	25	60	3	-5.116	2.00574	RAD21
chr4	87417285	87417591	chr4	87816944	87817201	399353	30	30	3	-4.60517	2.82665	RAD21
chr6	130214897	130215209	chr6	130342091	130342555	126882	56	79	7	-4.50298	2.41092	RAD21
chr7	139330620	139330970	chr7	139703761	139704077	372791	95	220	17	-4.28108	3.09435	RAD21
chr22	41799826	41800310	chr22	41913713	41914076	113403	67	56	14	-2.95193	3.7972	RAD21
chr10	95462055	95462469	chr10	95576016	95576193	113547	44	20	5	-3.56105	3.22511	RAD21
chr20	32900309	32900928	chr20	33110949	33111196	210021	96	54	8	-4.39445	2.7788	RAD21
chr2	80300239	80300617	chr2	80465923	80466089	165306	38	22	5	-3.50975	3.45938	RAD21
chr15	86397601	86398008	chr15	88790116	88790325	2392108	28	29	4	-3.92691	3.29485	RAD21
chr19	13306641	13306902	chr19	13372275	13372401	65373	29	77	5	-4.49223	2.02817	RAD21
chr11	120105773	120106140	chr11	120170769	120171048	64629	84	74	29	-2.00029	4.31473	RAD21
chr11	120105773	120106140	chr11	120173795	120174055	67655	84	56	17	-2.78974	3.61626	RAD21
chr21	22371923	22372264	chr21	22474328	22474546	102064	63	26	6	-3.81771	2.91273	RAD21
chr14	72983656	72984019	chr14	73371560	73372044	387541	55	69	7	-4.34962	3.04054	RAD21
chr14	72983656	72984019	chr14	73409770	73409908	425751	55	8	3	-3.88955	3.44018	RAD21
chr10	102974516	102974786	chr10	103048093	103048272	73307	73	21	4	-4.56239	2.01603	RAD21
chr10	102974516	102974786	chr10	103051449	103051637	76663	73	30	5	-4.47278	2.12223	RAD21
chr14	102606990	102607278	chr14	102701694	102701991	94416	29	58	5	-4.20886	2.49235	RAD21
chr6	43737084	43738016	chr6	43918998	43919334	180982	368	196	27	-4.59452	2.51608	RAD21
chr1	151318661	151318831	chr1	151371767	151372135	52936	33	67	5	-4.48232	1.94708	RAD21
chr8	61048580	61049165	chr8	61309217	61309763	260052	53	101	5	-5.36654	2.03095	RAD21
chr2	9282842	9283292	chr2	9511553	9511863	228261	97	52	10	-3.92078	3.24978	RAD21
chr2	9282842	9283292	chr2	9473797	9474032	190505	97	49	5	-5.24766	1.95191	RAD21
chr10	134650438	134650771	chr10	134717841	134718145	67070	19	28	3	-4.07942	2.42065	RAD21
chr5	6633419	6633563	chr5	6745720	6746109	112157	35	60	4	-4.8771	1.97937	RAD21
chr5	37837567	37837888	chr5	38193189	38193529	355301	40	113	13	-3.28637	3.95195	RAD21
chr19	54345357	54345904	chr19	54527166	54527487	181262	47	50	6	-4.17865	2.89701	RAD21
chr4	160408427	160408805	chr4	164465625	164465819	4056820	39	36	3	-5.04986	2.46666	RAD21
chr10	78933578	78934010	chr10	79403851	79404042	469841	45	47	8	-3.49793	3.78452	RAD21
chr4	140578114	140578431	chr4	140661679	140661960	83248	43	25	4	-4.20749	2.41508	RAD21
chr4	140578114	140578431	chr4	140682640	140682860	104209	43	26	4	-4.24671	2.52436	RAD21
chr10	44186042	44186172	chr10	44280756	44280956	94584	30	19	3	-4.14841	2.55009	RAD21
chr2	20215339	20215645	chr2	20293487	20293648	77842	61	40	8	-3.64087	2.9061	RAD21
chr11	44749460	44749706	chr11	44915675	44916019	165969	41	59	6	-4.20759	2.82002	RAD21
chr1	240354156	240354384	chr1	240855478	240855630	501094	38	8	3	-3.5198	3.77119	RAD21
chr3	129995042	129995562	chr3	130087799	130087931	92237	58	16	3	-4.63581	2.07797	RAD21
chr3	129995042	129995562	chr3	130257825	130258152	262263	58	31	6	-3.91091	3.33217	RAD21
chr19	8009060	8009394	chr19	8067335	8067658	57941	77	28	5	-4.45713	2.00685	RAD21
chr1	15650037	15650516	chr1	15757474	15757964	106958	60	95	7	-4.7564	2.06253	RAD21
chr1	15650037	15650516	chr1	15771039	15771294	120523	60	18	3	-4.78749	2.10988	RAD21
chr18	32585926	32586259	chr18	32723853	32724293	137594	70	105	10	-4.29729	2.64709	RAD21
chr10	88471551	88471701	chr10	88659859	88660047	188158	65	74	20	-2.48699	4.46006	RAD21
chr10	88471551	88471701	chr10	88659512	88659748	187811	65	67	22	-2.19699	4.72354	RAD21
chr14	91643734	91644171	chr14	91752749	91753129	108578	38	71	14	-2.62215	4.07812	RAD21
chr4	79873101	79873492	chr4	81256395	81256520	1382903	63	69	6	-4.79372	2.66049	RAD21
chr1	31274540	31275027	chr1	31384070	31384632	109043	118	200	40	-2.69124	4.01607	RAD21
chr1	16940131	16940376	chr1	17278101	17278469	337725	95	69	8	-4.6291	2.79561	RAD21
chr8	38688196	38688565	chr8	38823977	38824259	135412	70	60	6	-4.75932	2.20765	RAD21
chr3	172526862	172527262	chr3	172700536	172700811	173274	30	42	3	-4.94164	2.17216	RAD21
chr8	124936902	124937264	chr8	125050067	125050259	112803	79	68	7	-4.69714	2.15229	RAD21
chr10	121510152	121510626	chr10	121618710	121619277	108084	39	55	11	-2.8751	3.83731	RAD21
chr9	72955867	72955997	chr9	73217288	73217693	261291	30	63	8	-3.38545	3.79837	RAD21
chr3	187459920	187460156	chr3	188672439	188672739	1212283	68	49	6	-4.52781	2.87435	RAD21
chr3	136470938	136471608	chr3	136732661	136733191	261053	103	81	7	-5.13736	2.23735	RAD21
chr5	169701439	169701658	chr5	169765754	169766322	64096	33	143	11	-3.66356	2.78077	RAD21
chr1	11397637	11397852	chr1	11702430	11702806	304578	14	137	4	-4.78645	2.62638	RAD21
chr4	4386639	4386945	chr4	4432388	4432691	45443	19	26	3	-4.00531	2.29711	RAD21
chr2	218666033	218666231	chr2	218751497	218751766	85266	21	62	7	-3.27984	3.29723	RAD21
chr21	36260951	36261184	chr21	36398993	36399352	137809	151	57	8	-4.90145	2.08324	RAD21
chr10	21367364	21368338	chr10	21558687	21559201	190349	142	99	32	-2.61948	4.3446	RAD21
chr19	54312836	54312966	chr19	54527166	54527487	214200	16	50	3	-4.48739	2.70518	RAD21
chr22	31741835	31742085	chr22	31795407	31795661	53322	36	26	10	-2.23645	3.94187	RAD21
chr17	42021284	42021866	chr17	42118774	42119255	96908	74	55	9	-3.91695	2.783	RAD21
chr4	15480473	15481180	chr4	15651586	15651890	170406	98	42	11	-3.52685	3.4601	RAD21
chr3	136537011	136537278	chr3	136732661	136733191	195383	39	81	6	-4.47449	2.66995	RAD21
chr17	19265912	19266587	chr17	19350382	19350697	83795	83	32	14	-2.60646	3.91614	RAD21
chr11	33187871	33188185	chr11	33351638	33351758	163453	47	83	13	-3.13909	3.79443	RAD21
chr11	33187871	33188185	chr11	33351068	33351597	162883	47	67	13	-2.92494	3.98976	RAD21
chr6	6057762	6058101	chr6	6547283	6547736	489182	35	87	10	-3.41609	3.85649	RAD21
chr1	112058849	112059030	chr1	112198936	112199358	139906	11	63	3	-4.34381	2.61072	RAD21
chr2	220082670	220082792	chr2	220159915	220160268	77123	29	91	5	-4.65928	1.95152	RAD21
chr11	46413536	46413714	chr11	46559371	46559774	145657	59	60	8	-4.013	2.93749	RAD21
chr17	55969897	55970282	chr17	56071679	56071799	101397	40	65	6	-4.27975	2.47447	RAD21
chr18	864716	865239	chr18	1062514	1062927	197275	103	116	8	-5.22944	1.98949	RAD21
chr12	107116728	107116938	chr12	107235519	107235834	118581	14	79	3	-4.81128	2.07692	RAD21
chr1	224832323	224832547	chr1	225039266	225039497	206719	25	59	3	-5.09919	2.13347	RAD21
chr16	55498881	55499478	chr16	55577432	55577685	77954	120	41	14	-3.22295	3.29666	RAD21
chr16	55498881	55499478	chr16	55677198	55677419	177720	120	39	13	-3.32115	3.67042	RAD21
chr16	55498881	55499478	chr16	55735663	55735950	236185	120	60	15	-3.46574	3.67568	RAD21
chr16	55498881	55499478	chr16	55737358	55737598	237880	120	67	15	-3.57608	3.58051	RAD21
chr3	195800225	195800443	chr3	195923322	195923784	122879	50	108	10	-3.98898	2.87342	RAD21
chr6	159139551	159139900	chr6	159393288	159394002	253388	54	170	10	-4.51961	2.77136	RAD21
chr1	150540586	150540856	chr1	150785543	150785950	244687	26	68	3	-5.28038	2.0718	RAD21
chr15	93352317	93352849	chr15	93425692	93426099	72843	148	87	27	-2.87145	3.58428	RAD21
chr11	71802264	71802761	chr11	71892814	71893005	90053	62	25	4	-4.57342	2.121	RAD21
chr3	136264583	136264810	chr3	136470938	136471608	206128	43	103	9	-4.00148	3.12505	RAD21
chr3	136264583	136264810	chr3	136471906	136472095	207096	43	107	8	-4.27515	2.87972	RAD21
chr3	136264583	136264810	chr3	136336018	136336263	71208	43	33	4	-4.48512	2.07374	RAD21
chr3	136264583	136264810	chr3	136336301	136336507	71491	43	37	4	-4.59953	1.96948	RAD21
chr11	57336821	57337000	chr11	57409054	57409273	72054	114	92	25	-2.82024	3.62517	RAD21
chr11	57336821	57337000	chr11	57412220	57412577	75220	114	91	19	-3.35818	3.1503	RAD21
chr2	228270791	228271292	chr2	228630995	228631323	359703	65	25	3	-5.19604	2.30722	RAD21
chr2	228270791	228271292	chr2	228331054	228331276	59762	65	12	3	-4.46207	2.01609	RAD21
chr15	58519842	58520349	chr15	59050446	59050735	530097	68	39	3	-5.68584	1.97679	RAD21
chr1	153483355	153483695	chr1	153590127	153590371	106432	162	29	6	-4.87137	1.95135	RAD21
chr1	153483355	153483695	chr1	153539047	153539291	55352	162	45	14	-3.61614	2.73922	RAD21
chr1	153483355	153483695	chr1	153540902	153541437	57207	162	135	39	-2.66575	3.61451	RAD21
chr1	153483355	153483695	chr1	153539429	153539629	55734	162	73	20	-3.38659	2.94878	RAD21
chr5	121851893	121852210	chr5	122335683	122336002	483473	31	44	4	-4.44559	2.99608	RAD21
chr22	22067994	22068302	chr22	22307042	22307728	238740	575	167	23	-5.20138	2.12762	RAD21
chr11	64691557	64691811	chr11	64764206	64764681	72395	28	90	5	-4.61314	1.9628	RAD21
chr6	108880978	108881113	chr6	109006056	109006323	124943	72	25	4	-4.72295	2.19426	RAD21
chr4	75186243	75186726	chr4	75596331	75596662	409605	84	110	6	-5.54778	2.0327	RAD21
chr2	65492769	65492956	chr2	65800279	65800549	307323	106	54	7	-4.7606	2.65283	RAD21
chr9	131058867	131059133	chr9	131103134	131103338	44001	256	155	30	-3.78621	2.46639	RAD21
chr9	131058867	131059133	chr9	131103545	131103995	44412	256	209	31	-4.01954	2.27431	RAD21
chrX	149617626	149617844	chrX	149712725	149712943	94881	20	18	3	-3.68888	2.98239	RAD21
chr2	219051070	219051393	chr2	219122477	219122648	71084	41	15	4	-3.64903	2.84834	RAD21
chr9	117196918	117197489	chr9	117422675	117422921	225186	72	42	4	-5.24175	2.05547	RAD21
chr9	117196918	117197489	chr9	117415516	117416303	218027	72	103	7	-5.01957	2.23568	RAD21
chr9	117196918	117197489	chr9	117270053	117270284	72564	72	45	6	-4.49981	2.0692	RAD21
chr1	227506150	227506292	chr1	227584314	227585322	78022	71	78	10	-4.01422	2.5592	RAD21
chr1	85133901	85134211	chr1	85190125	85190395	55914	32	39	6	-3.54578	2.80815	RAD21
chr11	32456044	32456311	chr11	32814408	32814767	358097	45	61	5	-4.69866	2.73488	RAD21
chr6	52861512	52861712	chr6	52926465	52926846	64753	57	99	18	-2.85743	3.52767	RAD21
chr20	33734905	33735262	chr20	33796025	33796498	60763	84	144	13	-4.27073	2.19791	RAD21
chr20	30449336	30449576	chr20	30539721	30540211	90145	13	69	3	-4.60183	2.09508	RAD21
chr6	139137272	139137528	chr6	139309350	139309716	171822	38	36	4	-4.44852	2.61922	RAD21
chr1	17828842	17829252	chr1	17933318	17933616	104066	26	36	4	-4.06903	2.69031	RAD21
chr1	17828842	17829252	chr1	17928256	17928442	99004	26	26	3	-4.31897	2.42098	RAD21
chr19	18389990	18390690	chr19	18433839	18434789	43149	142	133	26	-3.32998	2.83764	RAD21
chr6	143013953	143014558	chr6	143748351	143748643	733793	49	49	5	-4.56476	2.9185	RAD21
chr12	121498456	121498642	chr12	121548040	121548516	49398	74	64	8	-4.30407	2.07668	RAD21
chr1	31255092	31255530	chr1	31402213	31402626	146683	128	115	15	-4.18086	2.78493	RAD21
chr1	31255092	31255530	chr1	31401261	31401383	145731	128	98	14	-4.15888	2.80215	RAD21
chr18	57663667	57663913	chr18	58216676	58216874	552763	28	23	4	-3.69511	3.6271	RAD21
chr16	58370505	58371076	chr16	58521519	58522096	150443	86	110	27	-2.56315	4.29543	RAD21
chr16	58370505	58371076	chr16	58522571	58522822	151495	86	121	24	-2.89403	3.99079	RAD21
chr10	92803114	92803348	chr10	93011146	93011644	207798	22	60	4	-4.4128	2.7569	RAD21
chr16	87495091	87495346	chr16	87669096	87669369	173750	25	95	4	-5.00016	2.12022	RAD21
chr15	68155564	68156564	chr15	68343593	68343836	187029	115	50	10	-4.05178	3.03061	RAD21
chr22	32373640	32373785	chr22	32476984	32477218	103199	37	22	9	-2.30751	4.33853	RAD21
chr22	32373640	32373785	chr22	32774715	32774972	400930	37	21	3	-4.45822	2.95169	RAD21
chr6	122797370	122797783	chr6	122851672	122851934	53889	20	32	3	-4.26424	2.14784	RAD21
chr15	68155564	68156564	chr15	68447232	68447622	290668	115	50	9	-4.26251	3.06951	RAD21
chr16	71842975	71843262	chr16	71917695	71918135	74433	54	68	8	-4.04961	2.50083	RAD21
chr16	71842975	71843262	chr16	71916386	71916578	73124	54	51	8	-3.76193	2.75888	RAD21
chr16	71842975	71843262	chr16	71929242	71929497	85980	54	28	6	-3.73767	2.874	RAD21
chr11	63605827	63606327	chr11	63688667	63688840	82340	175	27	8	-4.30174	2.32074	RAD21
chr11	63605827	63606327	chr11	63713216	63713656	106889	175	86	19	-3.73026	3.02631	RAD21
chr11	63605827	63606327	chr11	63674060	63674459	67733	175	42	17	-3.23603	3.20462	RAD21
chr11	63605827	63606327	chr11	63680316	63680436	73989	175	26	7	-4.53106	2.04976	RAD21
chr15	98854900	98855138	chr15	98971657	98971864	116519	22	14	5	-2.51122	4.22945	RAD21
chr15	98854900	98855138	chr15	98964840	98965128	109702	22	35	5	-3.42751	3.32798	RAD21
chr1	246175509	246176002	chr1	246366575	246366749	190573	72	23	3	-5.21494	1.98192	RAD21
chr4	56311076	56311267	chr4	56602567	56603287	291300	33	117	6	-4.67516	2.70559	RAD21
chr18	46588643	46588836	chr18	46705134	46705432	116298	13	57	3	-4.41078	2.44123	RAD21
chr17	34176609	34177023	chr17	34336439	34336670	159416	58	19	3	-4.80766	2.24395	RAD21
chr7	88176068	88176411	chr7	88464537	88464730	288126	51	34	5	-4.23931	3.08618	RAD21
chr7	88176068	88176411	chr7	88388762	88388897	212351	51	31	3	-5.16859	2.08576	RAD21
chr7	88176068	88176411	chr7	88391139	88391357	214728	51	31	3	-5.16859	2.09226	RAD21
chr17	53626551	53626793	chr17	53679211	53679467	52418	25	79	8	-3.42944	2.87393	RAD21
chr7	91762937	91763337	chr7	92077623	92077745	314286	62	107	7	-4.90814	2.53215	RAD21
chr12	46547121	46547450	chr12	46696863	46697179	149413	38	30	3	-4.84156	2.18046	RAD21
chr13	45621379	45621879	chr13	45883299	45883557	261420	54	40	14	-2.39975	4.67659	RAD21
chr11	100553093	100553273	chr11	100726286	100726607	173013	19	39	3	-4.41078	2.6579	RAD21
chr16	67917563	67917970	chr16	68023974	68024184	106004	58	32	4	-4.75359	2.05943	RAD21
chr16	67917563	67917970	chr16	67962349	67962787	44379	58	116	13	-3.68413	2.55703	RAD21
chr7	99229250	99229626	chr7	99435503	99435937	205877	63	113	7	-4.9787	2.24027	RAD21
chr20	43312213	43312519	chr20	43496301	43496578	183782	98	55	7	-4.70048	2.42857	RAD21
chr20	43312213	43312519	chr20	43361922	43362437	49403	98	68	10	-4.1993	2.16802	RAD21
chr5	66453173	66453321	chr5	66502857	66503130	49536	31	30	5	-3.61631	2.67763	RAD21
chr12	6863643	6863853	chr12	6934773	6935123	70920	183	135	44	-2.54638	3.86959	RAD21
chrX	31232124	31232366	chrX	31676506	31676809	444140	17	34	3	-4.16235	3.2187	RAD21
chr3	111436465	111436716	chr3	111686596	111686778	249880	29	11	5	-2.54632	4.52541	RAD21
chr5	176085128	176085315	chr5	176538772	176539287	453457	48	103	5	-5.28705	2.27917	RAD21
chr9	35116342	35116535	chr9	35415089	35415273	298554	94	32	5	-4.79015	2.61468	RAD21
chr9	35116342	35116535	chr9	35477156	35477538	360621	94	65	5	-5.49881	2.04722	RAD21
chr5	171906020	171906378	chr5	172124399	172124816	218021	51	73	12	-3.25247	3.82732	RAD21
chr12	71809451	71809815	chr12	71945391	71945752	135576	36	37	4	-4.42185	2.52411	RAD21
chr1	203595705	203595985	chr1	203667419	203667546	71434	132	54	10	-4.26662	2.27798	RAD21
chr1	203595705	203595985	chr1	203670699	203671857	74714	132	282	39	-3.19759	3.29595	RAD21
chr8	92003431	92003849	chr8	92088896	92089237	85047	44	59	7	-3.96991	2.64998	RAD21
chr22	38909179	38909370	chr22	38968112	38968422	58742	5	54	3	-3.4012	2.96912	RAD21
chr6	51720147	51720416	chr6	51914271	51914609	193855	33	17	3	-4.1325	2.97668	RAD21
chr12	112262248	112262392	chr12	112450811	112451397	188419	17	147	4	-5.05106	2.12414	RAD21
chr2	65291917	65292547	chr2	65396402	65396705	103855	72	34	6	-4.21951	2.54761	RAD21
chr2	65291917	65292547	chr2	65414344	65414936	121797	72	47	5	-4.90794	2.00354	RAD21
chr15	81288667	81288868	chr15	81558220	81559087	269352	25	169	6	-4.76526	2.58566	RAD21
chr5	96333056	96333267	chr5	96497620	96498081	164353	40	97	6	-4.68007	2.37972	RAD21
chr12	32908079	32908302	chr12	33072182	33072323	163880	68	14	5	-3.63969	3.33519	RAD21
chr12	32908079	32908302	chr12	34175040	34175289	1266738	68	26	3	-5.28038	2.29174	RAD21
chr11	86808577	86808918	chr11	86992616	86992831	183698	41	34	3	-5.04271	2.11587	RAD21
chr10	15309634	15309809	chr10	15413061	15413201	103252	17	37	6	-2.86061	3.81957	RAD21
chr10	15309634	15309809	chr10	15413223	15413464	103414	17	39	6	-2.91326	3.77127	RAD21
chr1	26611315	26611909	chr1	26717795	26718330	105886	76	101	9	-4.5514	2.24867	RAD21
chr5	34523220	34523693	chr5	34898335	34898749	374642	95	132	12	-4.46687	2.93631	RAD21
chr1	161199838	161199958	chr1	161337535	161337937	137577	30	40	5	-3.8712	3.04522	RAD21
chr7	155391470	155391775	chr7	155561061	155561310	169286	61	63	5	-5.03513	2.07179	RAD21
chr11	118166600	118166958	chr11	118223814	118224179	56856	39	47	6	-3.93019	2.47253	RAD21
chr11	118166600	118166958	chr11	118359149	118359565	192191	39	77	5	-4.78849	2.37518	RAD21
chr11	64902229	64902636	chr11	64948174	64948888	45538	50	95	16	-2.92072	3.22107	RAD21
chr17	71425584	71425939	chr17	71706341	71706600	280402	43	31	6	-3.61167	3.62983	RAD21
chr1	46502468	46503072	chr1	46639067	46639423	135995	243	40	11	-4.38615	2.55891	RAD21
chr11	64321453	64321573	chr11	64416933	64417180	95360	95	87	21	-2.93074	3.69573	RAD21
chr11	64321453	64321573	chr11	64420488	64420905	98915	95	91	9	-4.67029	2.09094	RAD21
chr11	64321453	64321573	chr11	64418440	64418672	96867	95	108	22	-3.05392	3.59136	RAD21
chr1	109055077	109055826	chr1	109186072	109186556	130246	140	91	18	-3.67176	3.20726	RAD21
chr1	109055077	109055826	chr1	109103658	109103843	47832	140	144	31	-3.04348	3.15237	RAD21
chr1	109055077	109055826	chr1	109112678	109113328	56852	140	67	12	-4.17652	2.25096	RAD21
chr1	109055077	109055826	chr1	109104281	109104695	48455	140	134	29	-3.10489	3.1084	RAD21
chr3	138832741	138832896	chr3	139047984	139048589	215088	43	122	9	-4.17077	2.99292	RAD21
chr9	80048660	80048960	chr9	80736463	80736757	687503	32	25	5	-3.46574	3.81135	RAD21
chr5	142092717	142092930	chr5	142260123	142260565	167193	21	74	3	-5.15136	1.95711	RAD21
chr19	41710185	41710483	chr19	41768027	41768594	57544	42	107	15	-2.9944	3.32275	RAD21
chr10	125343260	125343512	chr10	125727215	125727496	383703	32	36	14	-1.77114	5.23643	RAD21
chr16	57333588	57333835	chr16	57456274	57456575	122439	152	56	18	-3.26849	3.54859	RAD21
chr1	203309053	203309576	chr1	203456555	203457214	146979	278	84	25	-3.62069	3.30619	RAD21
chr1	203309053	203309576	chr1	203413499	203413785	103923	278	42	14	-4.08718	2.67233	RAD21
chr2	121453194	121453619	chr2	121837792	121838122	384173	87	49	14	-3.07961	4.12155	RAD21
chr2	121453194	121453619	chr2	121834604	121834815	380985	87	38	5	-4.88462	2.58247	RAD21
chr6	36583003	36583500	chr6	36647964	36648093	64464	102	152	15	-4.23275	2.26053	RAD21
chr18	55719083	55719346	chr18	55789102	55789445	69756	21	79	5	-4.19509	2.33265	RAD21
chr3	187458781	187458954	chr3	188672439	188672739	1213485	88	49	8	-4.21027	3.11903	RAD21
chr2	33638046	33638311	chr2	33808102	33808635	169791	23	48	5	-3.78782	3.21861	RAD21
chr5	149217206	149217828	chr5	149370320	149370844	152492	114	173	22	-3.70741	3.23984	RAD21
chr11	126177698	126177908	chr11	126350688	126350914	172780	23	38	3	-4.57586	2.50576	RAD21
chr1	58981454	58981895	chr1	59118286	59118599	136391	49	47	6	-4.15845	2.7732	RAD21
chr9	129467584	129467817	chr9	129540130	129540287	72313	60	33	5	-4.37198	2.18623	RAD21
chr1	23424889	23425639	chr1	23504161	23504358	78522	211	46	10	-4.57533	2.03928	RAD21
chr10	69548219	69548648	chr10	69916091	69916537	367443	77	55	6	-4.76762	2.67633	RAD21
chr10	69548219	69548648	chr10	69968249	69968557	419601	77	51	6	-4.69211	2.76059	RAD21
chr1	151507165	151507565	chr1	151808631	151809210	301066	68	97	7	-4.9024	2.51931	RAD21
chr9	130548894	130549328	chr9	130627374	130627531	78046	165	76	13	-4.30678	2.28651	RAD21
chr2	8665276	8666290	chr2	8767923	8768091	101633	154	29	6	-4.82073	1.96837	RAD21
chr3	14244638	14245630	chr3	14538925	14539162	293295	286	43	7	-5.52537	1.95737	RAD21
chr17	32747235	32747851	chr17	32965360	32965560	217509	66	39	6	-4.2697	2.90982	RAD21
chr1	197148201	197148373	chr1	197325985	197326370	177612	32	31	4	-4.12713	2.9326	RAD21
chr4	9705168	9705387	chr4	10015448	10015694	310061	21	51	3	-4.77912	2.64012	RAD21
chr4	9705168	9705387	chr4	10016948	10017105	311561	21	71	3	-5.10998	2.3514	RAD21
chr3	39168137	39168448	chr3	39329571	39330245	161123	128	326	27	-4.04725	2.95068	RAD21
chr3	39168137	39168448	chr3	39328795	39329002	160347	128	275	25	-4.03105	2.96294	RAD21
chr6	69348090	69348655	chr6	69471146	69471551	122491	188	125	35	-2.95406	3.84451	RAD21
chr6	69348090	69348655	chr6	69677998	69678325	329343	188	48	6	-5.52412	2.01034	RAD21
chr10	62580134	62580308	chr10	63044074	63044320	463766	29	30	3	-4.57127	2.884	RAD21
chr10	62580134	62580308	chr10	62723849	62724478	143541	29	126	6	-4.62006	2.36536	RAD21
chr5	75441899	75442042	chr5	75505165	75505404	63123	12	16	3	-3.06027	3.32572	RAD21
chr7	142571079	142571316	chr7	142699201	142699580	127885	34	145	9	-4.10865	2.78627	RAD21
chr7	142571079	142571316	chr7	142700463	142700874	129147	34	188	10	-4.15763	2.74622	RAD21
chr4	122871346	122871730	chr4	123497961	123498331	626231	51	88	5	-5.19029	2.40193	RAD21
chr1	27324138	27324532	chr1	27372427	27372680	47895	99	303	21	-4.21981	2.13687	RAD21
chr1	27324138	27324532	chr1	27371020	27371515	46488	99	253	21	-4.03946	2.27867	RAD21
chr17	48941213	48941345	chr17	49027634	49028242	86289	101	133	25	-3.06772	3.5032	RAD21
chr3	172179365	172179765	chr3	172313833	172314201	134068	32	94	5	-4.79015	2.17376	RAD21
chr1	54776670	54777134	chr1	54953810	54955551	176676	48	349	14	-4.44816	2.6358	RAD21
chr2	132250362	132250519	chr2	132430249	132430503	179730	21	44	3	-4.63149	2.47814	RAD21
chr8	1683541	1684032	chr8	1729505	1729814	45473	64	35	12	-2.74442	3.36994	RAD21
chr1	112050729	112051225	chr1	112289868	112290199	238643	69	47	7	-4.19243	3.03047	RAD21
chr1	112050729	112051225	chr1	112198936	112199358	147711	69	63	12	-3.40743	3.50626	RAD21
chr1	205559898	205560223	chr1	205626724	205627167	66501	126	261	43	-2.8784	3.52432	RAD21
chr1	205559898	205560223	chr1	205627899	205628020	67676	126	267	38	-3.14836	3.28515	RAD21
chr1	205559898	205560223	chr1	205628065	205628393	67842	126	283	38	-3.20656	3.23274	RAD21
chr11	123451370	123451528	chr11	123578383	123578613	126855	9	35	3	-3.55535	3.3011	RAD21
chr3	128879891	128880038	chr3	128964471	128964907	84433	54	87	13	-3.32499	3.24888	RAD21
chr3	182902282	182902689	chr3	183100216	183100551	197527	102	155	18	-3.88765	3.20853	RAD21
chr3	182902282	182902689	chr3	183103563	183103683	200874	102	126	17	-3.79483	3.30051	RAD21
chr3	182902282	182902689	chr3	183103704	183104106	201015	102	162	18	-3.93183	3.17662	RAD21
chr11	14322238	14322662	chr11	14440337	14440736	117675	34	29	5	-3.67478	3.14113	RAD21
chr11	14322238	14322662	chr11	14476670	14476890	154008	34	17	4	-3.58699	3.35479	RAD21
chr1	180532256	180532459	chr1	180600880	180601247	68421	21	58	6	-3.52145	2.94626	RAD21
chr1	180532256	180532459	chr1	180601708	180601875	69249	21	71	7	-3.41538	3.05081	RAD21
chr2	231689170	231689528	chr2	231851907	231852266	162379	17	75	4	-4.37811	2.65041	RAD21
chr11	19579285	19579568	chr11	19926818	19927230	347250	27	85	3	-5.54126	2.00677	RAD21
chr11	19579285	19579568	chr11	19925033	19925480	345465	27	84	5	-4.50778	2.90129	RAD21
chr1	247275161	247275448	chr1	247536099	247536335	260651	23	35	3	-4.49362	2.80997	RAD21
chr18	11733031	11733305	chr18	12038993	12039345	305688	40	66	6	-4.29502	3.0604	RAD21
chr4	8689981	8690189	chr4	8887524	8887836	197335	12	18	3	-3.17805	3.8524	RAD21
chr10	112071158	112071534	chr10	112306927	112307264	235393	49	36	4	-4.70275	2.56574	RAD21
chr10	112071158	112071534	chr10	112295573	112296129	224039	49	56	7	-4.02535	3.14578	RAD21
chr10	112071158	112071534	chr10	112259304	112259476	187770	49	42	4	-4.8569	2.29897	RAD21
chr7	16742174	16742397	chr7	16957850	16958197	215453	31	44	4	-4.44559	2.74607	RAD21
chrX	37604711	37605072	chrX	37684486	37684789	79414	47	47	7	-3.80847	2.76095	RAD21
chrX	37604711	37605072	chrX	38034481	38034680	429409	47	31	3	-5.08691	2.43343	RAD21
chr5	143028344	143028595	chr5	143204481	143204693	175886	13	62	3	-4.49486	2.59046	RAD21
chr1	87379643	87379993	chr1	87490939	87491207	110946	42	52	5	-4.47004	2.3552	RAD21
chr1	87379643	87379993	chr1	87430845	87431383	50852	42	30	4	-4.36628	2.03396	RAD21
chr2	48827423	48827729	chr2	48952904	48953131	125175	44	27	6	-3.49651	3.34817	RAD21
chr15	66615740	66615954	chr15	66678986	66679359	63032	31	46	5	-4.04375	2.42325	RAD21
chr1	114522094	114522313	chr1	114674527	114674709	152214	88	24	8	-3.49651	3.43441	RAD21
chr1	114522094	114522313	chr1	114825371	114825804	303058	88	43	9	-3.84409	3.45435	RAD21
chr1	157933528	157933835	chr1	158094722	158095090	160887	32	43	4	-4.45435	2.57487	RAD21
chr17	53131288	53131480	chr17	53591315	53591716	459835	19	68	3	-4.96672	2.55097	RAD21
chr17	53131288	53131480	chr17	53373241	53373749	241761	19	74	5	-4.02963	3.18318	RAD21
chr20	54823109	54823275	chr20	54918897	54919361	95622	19	57	3	-4.79027	1.95602	RAD21
chr11	44307889	44308358	chr11	44559997	44560412	251639	79	111	15	-3.66288	3.53217	RAD21
chr1	24920113	24920301	chr1	25157097	25157617	236796	14	102	3	-5.06681	2.24317	RAD21
chr19	664913	665287	chr19	734047	734316	68760	78	63	20	-2.50838	3.88602	RAD21
chr19	664913	665287	chr19	737840	738057	72553	78	20	5	-4.13357	2.40936	RAD21
chr1	85773808	85774171	chr1	86046795	86047192	272624	43	42	3	-5.30165	2.11573	RAD21
chr1	27883654	27884060	chr1	27930669	27930849	46609	140	89	19	-3.5414	2.7068	RAD21
chr1	27883654	27884060	chr1	27932408	27932628	48348	140	208	33	-3.28617	2.9498	RAD21
chr1	27883654	27884060	chr1	27932790	27933193	48730	140	222	32	-3.41285	2.84495	RAD21
chr7	28962258	28962580	chr7	29448347	29448736	485767	51	65	6	-4.52269	2.9324	RAD21
chr12	116971061	116971314	chr12	117037085	117037961	65771	84	261	26	-3.47914	2.96428	RAD21
chr12	50526417	50526744	chr12	50708538	50708935	181794	23	110	4	-5.06339	2.09044	RAD21
chr7	38145565	38145816	chr7	38414006	38414311	268190	67	37	4	-5.04302	2.33636	RAD21
chr7	36331032	36331518	chr7	36527417	36527716	195899	115	26	4	-5.23044	1.98451	RAD21
chr5	134355135	134355312	chr5	134510416	134510806	155104	48	69	5	-4.88643	2.15675	RAD21
chr5	134355135	134355312	chr5	134509474	134509736	154162	48	59	5	-4.72986	2.29854	RAD21
chr10	71167642	71167815	chr10	71267440	71267905	99625	70	107	9	-4.52687	2.23034	RAD21
chr11	126180303	126180820	chr11	126229324	126229525	48504	69	31	7	-3.77627	2.5269	RAD21
chr11	126180303	126180820	chr11	126261916	126262249	81096	69	39	10	-3.2925	3.25468	RAD21
chr10	112114091	112114401	chr10	112295573	112296129	181172	38	56	10	-3.05777	3.92096	RAD21
chr10	112114091	112114401	chr10	112259304	112259476	144903	38	42	6	-3.79174	3.14058	RAD21
chr2	128349009	128349466	chr2	128407334	128407691	57868	69	40	7	-4.03117	2.39084	RAD21
chr2	128349009	128349466	chr2	128458152	128458489	108686	69	31	4	-4.8955	1.94204	RAD21
chr7	24859889	24860331	chr7	25109640	25110047	249309	98	59	12	-3.69269	3.50069	RAD21
chr15	91191369	91191662	chr15	91236938	91237241	45276	103	60	17	-3.06265	3.09609	RAD21
chr4	141281028	141281600	chr4	141559059	141559306	277459	56	22	3	-4.91917	2.46498	RAD21
chr2	190371385	190371662	chr2	190445193	190445357	73531	48	52	5	-4.60357	1.97923	RAD21
chr1	156427150	156427317	chr1	156578932	156579210	151615	82	69	7	-4.74901	2.27313	RAD21
chr1	156427150	156427317	chr1	156577857	156578248	150540	82	61	7	-4.62577	2.38404	RAD21
chr22	32061596	32061904	chr22	32366533	32366934	304629	24	53	4	-4.37576	2.98802	RAD21
chr22	32061596	32061904	chr22	32366086	32366449	304182	24	47	4	-4.25561	3.09325	RAD21
chr22	35826878	35827198	chr22	35979004	35979518	151806	29	61	5	-4.25929	2.72717	RAD21
chr11	16807125	16807479	chr11	16967548	16967803	160069	42	36	3	-5.12396	1.95488	RAD21
[truncated: 27,369 more rows]

## Sheet: Gm12878 interactions
Table S1. GM12878 interactions
Anchor region 1			Anchor region 2			interaction distance	Anchor region 1 reads	Anchor region 2 reads	PETs linking Anchor 1 and 2	raw score	Z-score	dataset
chrom	start	stop	chrom	start	stop
chr20	61940954	61941172	chr20	62013135	62013493	71963	25	64	4	-4.60517	3.58496	RAD21
chr21	45575260	45575496	chr21	45616094	45616554	40598	123	60	5	-5.68765	2.35485	RAD21
chr12	56709722	56710308	chr12	56857982	56858389	147674	84	171	8	-5.4136	3.11511	RAD21
chr1	46712721	46712888	chr1	46813222	46813529	100334	49	126	4	-5.95551	2.33343	RAD21
chr1	46712721	46712888	chr1	46813803	46814102	100915	49	162	4	-6.20683	2.07953	RAD21
chr16	3108768	3109867	chr16	3179327	3179936	69460	289	118	13	-5.30721	2.85597	RAD21
chr10	43248720	43248894	chr10	43600710	43601401	351816	20	170	3	-5.93431	3.11734	RAD21
chr12	15304452	15304770	chr12	15374008	15374725	69238	40	126	6	-4.94164	3.22901	RAD21
chr5	59109556	59110059	chr5	59457112	59457589	347053	140	74	5	-6.02683	3.01899	RAD21
chr1	3581469	3581808	chr1	3612217	3612550	30409	45	27	3	-4.90527	3.09096	RAD21
chr7	154720047	154720272	chr7	154744760	154745007	24488	309	59	8	-5.652	2.32983	RAD21
chr18	46305156	46305344	chr18	46327282	46328197	21938	266	106	10	-5.64177	2.32984	RAD21
chr14	51253984	51254210	chr14	51280240	51280465	26030	66	41	5	-4.68435	3.28453	RAD21
chr9	131936184	131936758	chr9	132372593	132373708	435835	232	586	18	-6.03931	3.08388	RAD21
chr9	131936184	131936758	chr9	132369870	132370029	433112	232	70	4	-6.92264	2.22243	RAD21
chr9	131936184	131936758	chr9	132372188	132372498	435430	232	489	19	-5.75022	3.36495	RAD21
chr15	68846302	68846866	chr15	68966280	68966731	119414	72	121	7	-5.18064	3.21588	RAD21
chr15	68846302	68846866	chr15	69168125	69168482	321259	72	250	5	-6.57925	2.42568	RAD21
chr3	138136315	138136748	chr3	138642217	138642712	505469	64	108	3	-6.64379	2.5326	RAD21
chr2	190953481	190954035	chr2	191141784	191142357	187749	228	52	5	-6.16171	2.4975	RAD21
chr8	79632517	79633095	chr8	79833553	79833967	200458	158	108	5	-6.52585	2.16523	RAD21
chr11	16213061	16213253	chr11	16627764	16628101	414511	40	69	6	-4.33947	4.73271	RAD21
chr6	47381620	47382816	chr6	47599123	47599642	216307	328	190	9	-6.64559	2.092	RAD21
chr6	47381620	47382816	chr6	47701869	47702445	319053	328	166	10	-6.29983	2.70272	RAD21
chr1	16118466	16118862	chr1	16382441	16382955	263579	84	175	4	-6.82301	2.0449	RAD21
chr1	16118466	16118862	chr1	16333561	16333868	214699	84	70	7	-4.78749	3.98697	RAD21
chr17	7737926	7738781	chr17	7760350	7760556	21569	177	101	9	-5.39682	2.56599	RAD21
chr17	7737926	7738781	chr17	7761834	7762008	23053	177	105	8	-5.67123	2.30553	RAD21
chr9	27033679	27034404	chr9	27276290	27276880	241886	99	110	5	-6.07672	2.74425	RAD21
chr10	86425593	86425995	chr10	86475466	86475947	49471	60	55	3	-5.90445	2.16906	RAD21
chr14	65647434	65647618	chr14	65673143	65673964	25525	88	142	7	-5.54134	2.44221	RAD21
chr14	65647434	65647618	chr14	65672022	65672411	24404	88	120	6	-5.68131	2.30087	RAD21
chr4	77432306	77432813	chr4	77669586	77670299	236773	230	190	22	-4.50302	4.33313	RAD21
chr4	77432306	77432813	chr4	77654574	77654933	221761	230	76	6	-6.18529	2.57889	RAD21
chr10	95136031	95136693	chr10	95242026	95242818	105333	233	173	29	-3.86974	4.48693	RAD21
chrX	129214425	129214604	chrX	129254343	129255170	39739	307	141	18	-4.89486	3.14677	RAD21
chr1	178511204	178512683	chr1	178722339	178722914	209656	445	88	19	-4.68653	4.07714	RAD21
chr1	178511204	178512683	chr1	178971672	178972369	458989	445	262	15	-6.25032	2.88947	RAD21
chr19	41250407	41250683	chr19	41325632	41325905	74949	53	60	4	-5.29205	2.89456	RAD21
chr19	41250407	41250683	chr19	41324620	41324810	73937	53	47	4	-5.04785	3.14023	RAD21
chr17	28431370	28432106	chr17	28604875	28605465	172769	165	85	10	-4.94343	3.70334	RAD21
chr15	45607230	45607468	chr15	45691775	45692124	84307	24	147	3	-5.97126	2.24084	RAD21
chr19	36046606	36046856	chr19	36083081	36083513	36225	31	185	4	-5.88175	2.14461	RAD21
chr8	125049911	125050411	chr8	125437504	125438608	387093	150	364	16	-5.36261	3.71741	RAD21
chr19	40283354	40284360	chr19	40333069	40333386	48709	239	186	19	-4.81333	3.27188	RAD21
chr10	119202412	119202795	chr10	120000518	120001389	797723	53	222	4	-6.60038	2.62948	RAD21
chr5	142985887	142986185	chr5	143139959	143140122	153774	105	74	4	-6.18544	2.34551	RAD21
chr3	32988980	32989667	chr3	33106367	33106974	116700	323	107	20	-4.45902	3.94073	RAD21
chr3	32988980	32989667	chr3	33115906	33116638	126239	323	240	47	-3.558	4.91199	RAD21
chr2	84249986	84250333	chr2	84529881	84530420	279548	54	151	6	-5.42274	3.5034	RAD21
chr2	84249986	84250333	chr2	84541695	84542349	291362	54	157	3	-6.84801	2.08973	RAD21
chr5	368774	368914	chr5	402995	403382	34081	63	56	3	-5.97126	2.04829	RAD21
chrX	73075283	73075809	chrX	73353131	73353726	277322	221	168	7	-6.63031	2.27539	RAD21
chr8	119755673	119756413	chr8	120082819	120083111	326406	274	55	6	-6.03694	2.9793	RAD21
chr3	46256062	46256774	chr3	46414059	46414379	157285	224	230	13	-5.71983	2.84077	RAD21
chr12	74809514	74809723	chr12	74930910	74931515	121187	34	105	3	-5.9831	2.40319	RAD21
chr3	128772104	128772675	chr3	128964353	128964923	191678	108	206	9	-5.61556	3.07241	RAD21
chr4	75054724	75055728	chr4	75177232	75177985	121504	301	221	37	-3.88344	4.55386	RAD21
chr2	10410656	10411149	chr2	10574925	10575527	163776	62	279	7	-5.86653	2.71615	RAD21
chr10	61624389	61625295	chr10	61791666	61791966	166371	180	139	8	-5.96855	2.62114	RAD21
chr20	5035833	5035981	chr20	5081421	5081917	45440	25	160	4	-5.52146	2.54125	RAD21
chr11	14930133	14930456	chr11	15027656	15028115	97200	142	67	9	-4.76607	3.53293	RAD21
chr3	113558099	113558242	chr3	113631692	113632113	73450	111	141	7	-5.76647	2.40261	RAD21
chr18	55847880	55848395	chr18	55899187	55899483	50792	110	40	4	-5.61677	2.46595	RAD21
chrX	107827836	107828280	chrX	108627797	108628486	799517	76	256	4	-7.10332	2.16873	RAD21
chr17	43212649	43213106	chr17	43275070	43275700	61964	271	231	41	-3.61739	4.55346	RAD21
chr5	95949554	95950310	chr5	96064674	96064823	114364	233	63	8	-5.43529	2.93133	RAD21
chr4	88954535	88954946	chr4	89132898	89133701	177952	85	250	9	-5.56966	3.07494	RAD21
chr8	56972438	56973014	chr8	57154419	57154858	181405	111	160	5	-6.56583	2.05969	RAD21
chr8	56972438	56973014	chr8	57101760	57102176	128746	111	81	4	-6.33139	2.0817	RAD21
chr12	109058184	109059392	chr12	109124026	109124423	64634	447	118	11	-6.07745	2.04941	RAD21
chr12	109058184	109059392	chr12	109125184	109125652	65792	447	140	12	-6.07439	2.05695	RAD21
chr12	109058184	109059392	chr12	109197090	109197747	137698	447	358	52	-4.0806	4.43554	RAD21
chr1	192446749	192447154	chr1	192578204	192578918	131050	227	356	35	-4.18918	4.28962	RAD21
chr16	4767462	4767721	chr16	5006051	5006574	238330	40	169	4	-6.04619	2.7659	RAD21
chr13	39625891	39626059	chr13	40186115	40186588	560056	132	129	7	-5.85079	3.30661	RAD21
chr5	42994793	42995572	chr5	43019691	43019872	24119	191	97	10	-5.22181	2.74834	RAD21
chr5	42994793	42995572	chr5	43020043	43020698	24471	191	99	8	-5.68851	2.29409	RAD21
chr4	154006202	154006755	chr4	154048816	154049475	42061	282	230	22	-4.8979	3.15499	RAD21
chr11	74855425	74855866	chr11	74915778	74916340	59912	122	114	8	-5.38134	2.74263	RAD21
chr22	25758081	25758636	chr22	25843825	25844223	85189	141	85	7	-5.49959	2.72653	RAD21
chr12	117463248	117463857	chr12	117557356	117557947	93499	119	205	20	-4.11067	4.18427	RAD21
chr5	446993	447332	chr5	472539	472679	25207	66	46	4	-5.24571	2.73023	RAD21
chr19	10230323	10230787	chr19	10362367	10362608	131580	60	209	5	-6.2178	2.21117	RAD21
chr1	18311021	18311461	chr1	18907836	18908238	596375	51	97	3	-6.30931	2.8803	RAD21
chr15	31520309	31520511	chr15	31558579	31558882	38068	70	92	4	-5.9977	2.03498	RAD21
chr15	31520309	31520511	chr15	31555529	31555865	35018	70	93	5	-5.56222	2.45886	RAD21
chr16	84705814	84706269	chr16	84760204	84760508	53935	118	196	15	-4.6327	3.47969	RAD21
chr16	84705814	84706269	chr16	84759515	84760120	53246	118	171	15	-4.49625	3.61524	RAD21
chr21	37513690	37514291	chr21	37703030	37703574	188739	183	159	11	-5.4826	3.19968	RAD21
chr6	37019085	37020093	chr6	37177963	37178674	157870	521	385	19	-6.32012	2.2237	RAD21
chr14	100538927	100539451	chr14	100574471	100575082	35020	105	168	10	-5.17275	2.8469	RAD21
chr13	27056685	27057182	chr13	27504357	27504895	447175	59	124	3	-6.70059	2.44761	RAD21
chr20	4089213	4089844	chr20	4214291	4214433	124447	297	17	3	-6.32972	2.06355	RAD21
chr1	24018655	24019108	chr1	24077601	24078293	58493	145	147	12	-4.99735	3.12876	RAD21
chr1	24018655	24019108	chr1	24071557	24071814	52449	145	102	10	-4.99654	3.10291	RAD21
chr5	126899780	126900381	chr5	127536827	127537468	636446	177	253	7	-6.81772	2.41261	RAD21
chr19	42257917	42258231	chr19	42324796	42325667	66565	69	190	6	-5.89761	2.24069	RAD21
chr19	42257917	42258231	chr19	42289463	42289895	31232	69	101	10	-4.24406	3.75001	RAD21
chr1	244766658	244767101	chr1	244960137	244960721	193036	140	123	18	-3.97308	4.76594	RAD21
chr3	88268399	88268755	chr3	89148065	89148533	879310	89	76	5	-5.60049	3.54042	RAD21
chr3	155100182	155100573	chr3	155419577	155420107	319004	53	156	3	-6.82292	2.17641	RAD21
chr4	81286997	81287577	chr4	81973349	81974051	685772	213	168	9	-6.09081	3.09746	RAD21
chr4	81286997	81287577	chr4	81911012	81911545	623435	213	102	4	-7.21368	2.03779	RAD21
chr4	81286997	81287577	chr4	81960645	81961673	673068	213	297	20	-5.06356	4.05317	RAD21
chr1	20559911	20560292	chr1	20756744	20757287	196452	43	85	3	-6.00663	2.68583	RAD21
chr16	56901169	56901634	chr16	56985102	56985663	83468	138	123	11	-4.94365	3.28686	RAD21
chr10	52823451	52823795	chr10	53182378	53182886	358583	32	54	3	-5.2575	3.79889	RAD21
chr12	6978617	6978908	chr12	7046918	7047605	68010	110	83	5	-5.90045	2.2434	RAD21
chr9	108400114	108400398	chr9	108480780	108481334	80382	57	221	7	-5.54939	2.65458	RAD21
chr3	33172889	33173868	chr3	33414119	33414960	240251	288	198	28	-4.28682	4.56127	RAD21
chr3	33172889	33173868	chr3	33294232	33294503	120364	288	24	4	-6.06843	2.312	RAD21
chr14	51253984	51254210	chr14	51326660	51327821	72450	66	273	7	-5.90731	2.25425	RAD21
chr3	148445114	148445397	chr3	148665050	148665379	219653	35	102	3	-5.9831	2.77924	RAD21
chr1	158065593	158065925	chr1	158091395	158091849	25470	52	108	7	-4.74155	3.22517	RAD21
chr4	142228115	142228855	chr4	142632251	142632705	403396	227	80	5	-6.5881	2.52357	RAD21
chr4	142228115	142228855	chr4	143047958	143048473	819103	227	123	5	-7.01826	2.24788	RAD21
chr6	20401656	20401818	chr6	20529418	20529744	127600	92	229	6	-6.37199	2.03481	RAD21
chr10	73885955	73886348	chr10	74100210	74100511	213862	87	90	7	-5.0739	3.69181	RAD21
chr20	15217329	15217914	chr20	15634692	15635199	416778	133	149	5	-6.67542	2.44975	RAD21
chrX	38051255	38051697	chrX	38186711	38187287	135014	75	132	7	-5.30847	3.16048	RAD21
chr16	50360883	50361391	chr16	50388118	50388367	26727	92	149	6	-5.94222	2.05348	RAD21
chr10	22862365	22862588	chr10	23277694	23278287	415106	136	436	10	-6.38513	2.73218	RAD21
chr3	101292313	101293022	chr3	101354970	101355460	61948	133	77	5	-6.01528	2.10283	RAD21
chr1	180850864	180851474	chr1	180889873	180890142	38399	173	75	8	-5.3119	2.7227	RAD21
chr1	180850864	180851474	chr1	180951252	180951498	99778	173	67	5	-6.13911	2.14347	RAD21
chr1	180850864	180851474	chr1	180950665	180951137	99191	173	56	6	-5.59512	2.69607	RAD21
chr20	19186536	19187143	chr20	19642896	19643535	455753	121	252	6	-6.7417	2.4125	RAD21
chr10	63657502	63657698	chr10	64004626	64005516	346928	221	407	13	-6.27708	2.76904	RAD21
chr22	17652058	17653040	chr22	17980614	17981422	327574	184	260	17	-5.10919	3.91234	RAD21
chr9	71199244	71199997	chr9	71614288	71615206	414291	394	365	16	-6.33107	2.7844	RAD21
chr6	105130930	105131323	chr6	105525648	105526175	394325	100	77	3	-6.75175	2.35446	RAD21
chr1	23885706	23886099	chr1	23961265	23962021	75166	106	254	12	-5.23096	2.95799	RAD21
chr17	35062559	35062975	chr17	35404803	35405545	341828	81	147	4	-6.61229	2.42676	RAD21
chr17	35062559	35062975	chr17	35111920	35112197	48945	81	38	4	-5.25945	2.82084	RAD21
chr10	116931066	116931566	chr10	117176784	117176928	245218	75	113	5	-5.826	3.00812	RAD21
chr10	116931066	116931566	chr10	117177144	117177612	245578	75	136	5	-6.01127	2.82073	RAD21
chr7	123437765	123438480	chr7	123512294	123512710	73814	139	119	6	-6.13008	2.03197	RAD21
chr1	33760998	33761556	chr1	33833324	33833880	71768	162	221	20	-4.49429	3.69759	RAD21
chr1	33760998	33761556	chr1	33935898	33936636	174342	162	276	12	-5.73818	2.88866	RAD21
chr1	33760998	33761556	chr1	34078504	34078913	316948	162	99	4	-6.91013	2.08466	RAD21
chr1	154452147	154452925	chr1	154518923	154519344	65998	447	160	48	-3.43533	4.75633	RAD21
chr3	136824044	136824736	chr3	137511398	137511822	686662	162	112	5	-6.58722	2.63622	RAD21
chr12	42876432	42877129	chr12	42963006	42963809	85877	198	171	18	-4.64919	3.59832	RAD21
chr6	164076230	164076831	chr6	164377600	164378211	300769	110	347	11	-5.75401	3.21674	RAD21
chr17	53922641	53923001	chr17	54556225	54556644	633224	61	50	5	-4.80402	4.29788	RAD21
chr8	62051363	62052263	chr8	62381334	62381632	329071	265	145	6	-6.97294	2.04435	RAD21
chr17	37558875	37559037	chr17	37618047	37618491	59010	49	49	3	-5.58642	2.52962	RAD21
chr1	221915228	221915825	chr1	222182462	222183127	266637	260	93	6	-6.50976	2.37067	RAD21
chr16	11349302	11349837	chr16	11448614	11449239	98777	372	182	13	-5.993	2.28799	RAD21
chr16	11349302	11349837	chr16	11449283	11449567	99446	372	263	14	-6.21293	2.06659	RAD21
chr12	12529504	12530082	chr12	12808709	12809223	278627	283	172	11	-5.99715	2.9197	RAD21
chr12	12529504	12530082	chr12	12716875	12717476	186793	283	187	16	-5.33138	3.34913	RAD21
chr12	12529504	12530082	chr12	12761591	12762068	231509	283	111	8	-6.19609	2.59507	RAD21
chr12	12529504	12530082	chr12	12857489	12857990	327407	283	341	16	-5.93215	3.08606	RAD21
chr11	72963841	72963981	chr11	73000047	73000948	36066	12	302	3	-5.99811	2.02796	RAD21
chr11	9036976	9037626	chr11	9081623	9081977	43997	84	61	7	-4.64987	3.41437	RAD21
chr5	106440464	106440750	chr5	107008902	107009129	568152	48	252	3	-7.20341	2.02758	RAD21
chr10	6487483	6488181	chr10	6709741	6709917	221560	77	53	3	-6.11687	2.64817	RAD21
chr10	6487483	6488181	chr10	6711199	6711607	223018	77	98	3	-6.73155	2.02476	RAD21
chr10	6487483	6488181	chr10	6720089	6720504	231908	77	87	5	-5.59084	3.21305	RAD21
chr1	44228936	44229771	chr1	44396239	44396421	166468	284	34	6	-5.59182	3.01048	RAD21
chr4	155728120	155728673	chr4	156274947	156275461	546274	89	102	6	-5.53009	3.60861	RAD21
chr18	51749478	51750154	chr18	51795913	51796607	45759	176	111	9	-5.48557	2.57879	RAD21
chr3	195980265	195980825	chr3	196013941	196014847	33116	199	95	7	-5.95536	2.06101	RAD21
chr3	57947609	57948202	chr3	58159535	58159869	211333	96	103	4	-6.42649	2.30077	RAD21
chr2	137180982	137181572	chr2	138595868	138596482	1414296	117	184	5	-6.75823	2.47279	RAD21
chr11	58421487	58421962	chr11	58555801	58556218	133839	93	96	5	-5.87807	2.57016	RAD21
chr12	3422838	3423065	chr12	3886075	3886791	463010	32	134	3	-6.16635	2.97219	RAD21
chr4	73993643	73993865	chr4	74122622	74123560	128757	30	215	5	-5.55296	2.87985	RAD21
chr17	27090618	27091115	chr17	27243429	27243842	152314	125	73	4	-6.34618	2.17352	RAD21
chr7	96733931	96734400	chr7	96808696	96809310	74296	188	129	10	-5.49108	2.68807	RAD21
chr13	48700913	48701660	chr13	49221802	49222069	520142	159	59	3	-6.94922	2.24824	RAD21
chr5	52721641	52722305	chr5	53513486	53514145	791181	95	164	5	-6.43487	2.78113	RAD21
chr22	24585622	24586157	chr22	24643544	24643862	57387	170	63	11	-4.48314	3.64834	RAD21
chr1	33560583	33561067	chr1	33833324	33833880	272257	68	221	4	-6.84508	2.0451	RAD21
chr16	19412186	19412411	chr16	19514017	19514389	101606	29	88	3	-5.64741	2.65386	RAD21
chr10	124058227	124058742	chr10	124194586	124195193	135844	181	208	28	-3.87163	4.64008	RAD21
chr10	124058227	124058742	chr10	124325200	124325558	266458	181	79	6	-5.98443	2.90304	RAD21
chr4	184393276	184393962	chr4	184580668	184580890	186706	141	62	4	-6.30331	2.34825	RAD21
chr4	184393276	184393962	chr4	184580305	184580523	186343	141	59	4	-6.25371	2.39809	RAD21
chr4	184393276	184393962	chr4	184544538	184544766	150576	141	37	3	-6.36245	2.14941	RAD21
chr4	184393276	184393962	chr4	184523868	184524174	129906	141	40	4	-5.86505	2.56524	RAD21
chr12	122492986	122493438	chr12	122601396	122601541	107958	391	18	4	-6.08649	2.23541	RAD21
chr12	122492986	122493438	chr12	122607573	122608188	114135	391	279	73	-3.019	5.40029	RAD21
chr17	78400557	78401303	chr17	78954720	78955504	553417	271	219	11	-6.1954	2.97829	RAD21
chr21	43887411	43887779	chr21	43934548	43934745	46769	79	97	5	-5.72528	2.34041	RAD21
chr1	178280431	178280571	chr1	178470409	178471351	189838	144	144	18	-4.15888	4.56518	RAD21
chr6	47381620	47382816	chr6	47748418	47748908	365602	328	145	7	-6.87793	2.1969	RAD21
chr17	42477555	42478231	chr17	42600329	42601009	122098	96	131	13	-4.30965	4.12062	RAD21
chr1	6305183	6305392	chr1	6403490	6403829	98098	151	119	8	-5.63752	2.64765	RAD21
chr19	33921524	33921894	chr19	34262392	34262876	340498	53	120	6	-5.17426	3.86279	RAD21
chr2	191500672	191500979	chr2	191544927	191545382	43948	57	175	6	-5.62432	2.43154	RAD21
chr2	191500672	191500979	chr2	191544651	191544896	43672	57	158	6	-5.52213	2.53347	RAD21
chr2	191500672	191500979	chr2	191543538	191543686	42559	57	130	6	-5.32707	2.72535	RAD21
chr11	13231853	13232526	chr11	13365607	13366098	133081	131	154	15	-4.49605	3.98481	RAD21
chr15	69022640	69023363	chr15	69121236	69121770	97873	145	111	6	-6.10275	2.17169	RAD21
chr3	151789767	151790226	chr3	152161664	152162215	371438	117	201	6	-6.48196	2.59709	RAD21
chr20	2332404	2333139	chr20	2435346	2435696	102207	106	109	5	-6.13591	2.15789	RAD21
chr20	2332404	2333139	chr20	2432764	2433225	99625	106	110	8	-5.20504	3.0963	RAD21
chr15	48377017	48377181	chr15	48577787	48578437	200606	66	105	4	-6.07103	2.63263	RAD21
chr1	247553350	247553938	chr1	247650178	247650892	96240	131	255	18	-4.63572	3.66139	RAD21
chr1	247553350	247553938	chr1	247649931	247650116	95993	131	198	18	-4.38272	3.91847	RAD21
chr3	149230021	149230663	chr3	149489299	149489771	258636	158	131	9	-5.54334	3.33068	RAD21
chr3	149230021	149230663	chr3	149470114	149470931	239451	158	123	6	-6.29126	2.51945	RAD21
chr5	317203	317736	chr5	430981	431483	113245	212	145	20	-4.34186	4.04364	RAD21
chr4	42570583	42571067	chr4	42819531	42819890	248464	223	48	5	-6.0595	2.77954	RAD21
chr4	42570583	42571067	chr4	42752090	42752500	181023	223	109	15	-4.68242	3.99962	RAD21
chr4	42570583	42571067	chr4	42658945	42659271	87878	223	141	10	-5.75076	2.48225	RAD21
chr4	42570583	42571067	chr4	42659500	42659759	88433	223	156	10	-5.85186	2.3816	RAD21
chr4	42570583	42571067	chr4	42658118	42658709	87051	223	150	10	-5.81264	2.41517	RAD21
chr4	42570583	42571067	chr4	42867418	42868018	296351	223	128	8	-6.10032	2.85711	RAD21
chr4	183994673	183995299	chr4	184171013	184171381	175714	119	46	3	-6.41054	2.19979	RAD21
chr4	183994673	183995299	chr4	184177863	184178243	182564	119	85	7	-5.32995	3.33715	RAD21
chr16	84118385	84118832	chr16	84208799	84209457	89967	143	110	12	-4.69351	3.57214	RAD21
chr16	84118385	84118832	chr16	84220429	84221024	101597	143	139	9	-5.50287	2.80139	RAD21
chr18	3380689	3380923	chr18	3586507	3586975	205584	25	215	3	-6.39229	2.31828	RAD21
chr19	47359354	47359890	chr19	47494196	47494889	134306	171	125	14	-4.69186	3.78994	RAD21
chr11	15792388	15792700	chr11	16635130	16635547	842430	39	119	6	-4.85917	4.21864	RAD21
chr14	70070103	70070658	chr14	70193419	70194102	122761	352	542	84	-3.29726	5.16056	RAD21
chr6	2222188	2222469	chr6	2246373	2246761	23904	34	75	4	-5.07126	2.89418	RAD21
chr11	133797414	133798125	chr11	134009549	134009992	211424	166	85	8	-5.39576	3.35586	RAD21
chr18	46303345	46304603	chr18	46327282	46328197	22679	357	106	10	-5.936	2.04653	RAD21
chr8	71025884	71026312	chr8	71446493	71447441	420181	74	585	6	-7.09216	2.04575	RAD21
chr5	134209938	134210189	chr5	134240163	134240657	29974	47	223	8	-5.09844	2.89786	RAD21
chr1	220863383	220863761	chr1	220948656	220948905	84895	39	170	4	-6.02677	2.18672	RAD21
chr7	101245635	101246070	chr7	101915360	101916007	669290	136	301	8	-6.46088	2.75177	RAD21
chr14	62361171	62361594	chr14	62593522	62594067	231928	137	385	22	-4.69114	4.13012	RAD21
chr14	62361171	62361594	chr14	62593128	62593442	231534	137	317	22	-4.4968	4.32728	RAD21
chr1	146644075	146644494	chr1	146713857	146714949	69363	88	184	19	-3.80339	4.3939	RAD21
chr5	67581758	67582625	chr5	67957024	67957430	374399	277	97	7	-6.30691	2.77379	RAD21
chr6	43231168	43231772	chr6	43427338	43427573	195566	275	32	4	-6.30992	2.37124	RAD21
chr1	11724547	11724759	chr1	11779330	11780291	54571	49	178	9	-4.67915	3.43538	RAD21
chr8	126714776	126715173	chr8	127395841	127396341	680668	199	108	4	-7.20285	2.06299	RAD21
chr2	219717607	219718098	chr2	219762584	219763690	44486	138	327	13	-5.58732	2.47098	RAD21
chr1	36348527	36349029	chr1	36554788	36555036	205759	55	90	3	-6.30992	2.40325	RAD21
chr19	55979169	55979515	chr19	56016276	56016422	36761	79	235	19	-3.94016	4.08588	RAD21
chr19	55979169	55979515	chr19	56015247	56015781	35732	79	178	18	-3.77049	4.24866	RAD21
chr3	71055890	71056519	chr3	71701950	71702311	645431	132	100	4	-6.71538	2.51037	RAD21
chr2	108966420	108966831	chr2	109200431	109200994	233600	134	248	13	-5.28137	3.5327	RAD21
chr14	52462888	52463318	chr14	52739138	52739427	275820	73	56	4	-5.54322	3.37295	RAD21
chr2	122732498	122733150	chr2	122893554	122894121	160404	154	108	13	-4.58919	4.02091	RAD21
chr15	90545388	90545596	chr15	90602808	90603082	57212	83	59	4	-5.72379	2.3823	RAD21
chr1	226612102	226613026	chr1	226796306	226796843	183280	111	52	3	-6.46355	2.17157	RAD21
chr1	15717300	15717440	chr1	15757491	15757999	40051	17	185	3	-5.85634	2.18349	RAD21
chr17	66168393	66168946	chr17	66196846	66197266	27900	136	142	16	-4.3233	3.65084	RAD21
chr17	66168393	66168946	chr17	66196365	66196505	27419	136	118	16	-4.13816	3.82979	RAD21
chr14	88655405	88656139	chr14	88700173	88700677	44034	120	52	7	-4.84692	3.21585	RAD21
chr15	77265605	77266045	chr15	77316558	77317042	50513	132	121	8	-5.51971	2.56336	RAD21
chr15	77265605	77266045	chr15	77317356	77317496	51311	132	141	7	-5.93974	2.14002	RAD21
chr1	56167786	56168069	chr1	57050401	57051073	882332	36	156	3	-6.43615	2.78098	RAD21
chr15	52180737	52181450	chr15	52431755	52432476	250305	72	314	6	-6.44254	2.39534	RAD21
chr10	95136031	95136693	chr10	95271040	95271380	134347	233	118	16	-4.67655	3.80587	RAD21
chr11	120105671	120106318	chr11	120170724	120170981	64406	225	97	18	-4.21007	3.95775	RAD21
chr11	66175861	66176500	chr11	66246328	66246783	69828	223	125	15	-4.81939	3.35653	RAD21
chr2	68936441	68937091	chr2	69128090	69128621	190999	168	140	6	-6.48209	2.1788	RAD21
chr2	68936441	68937091	chr2	69152214	69153025	215123	168	280	9	-6.3643	2.37591	RAD21
chr1	3541506	3541651	chr1	3640841	3641294	99190	64	119	5	-5.71913	2.56948	RAD21
chr17	48894594	48895044	chr17	48919136	48919666	24092	72	193	7	-5.64754	2.33265	RAD21
chr11	133920427	133920792	chr11	134009549	134009992	88757	120	85	5	-6.01127	2.22031	RAD21
chr11	133920427	133920792	chr11	133968457	133968782	47665	120	60	6	-5.29832	2.77605	RAD21
chr11	8027881	8028441	chr11	8120716	8121276	92275	124	131	14	-4.41736	3.86522	RAD21
chr4	43133744	43134447	chr4	43884597	43884794	750150	196	18	3	-5.97126	3.20801	RAD21
chr2	47664240	47664814	chr2	47994788	47995491	329974	127	322	14	-5.34062	3.68328	RAD21
chr1	150039310	150039937	chr1	150137745	150138528	97808	98	175	6	-6.16623	2.10657	RAD21
chr1	156326631	156327151	chr1	156415602	156416017	88451	61	367	7	-6.12442	2.10327	RAD21
chr19	40283354	40284360	chr19	40334526	40334953	50166	239	288	21	-5.05038	3.03814	RAD21
chrX	16901098	16901687	chrX	17064623	17065141	162936	90	192	8	-5.59842	2.98954	RAD21
chrX	4465232	4465874	chrX	5795231	5795680	1329357	114	65	6	-5.32707	3.74484	RAD21
chr9	95264708	95264879	chr9	95396739	95397559	131860	78	240	9	-5.4429	3.00744	RAD21
chr4	55188919	55189491	chr4	55827573	55827899	638082	172	56	4	-6.40026	2.80372	RAD21
chr4	55188919	55189491	chr4	55306993	55307335	117502	172	86	10	-4.99667	3.39478	RAD21
chr4	55188919	55189491	chr4	55299854	55300164	110363	172	44	4	-6.1591	2.17263	RAD21
chr11	6624622	6625065	chr11	6704173	6705116	79108	126	199	8	-5.9707	2.21827	RAD21
chr16	49590188	49590839	chr16	49626738	49627117	35899	92	118	6	-5.70895	2.31589	RAD21
chr16	49590188	49590839	chr16	49627365	49627590	36526	92	146	7	-5.61357	2.41344	RAD21
chr9	119672574	119672868	chr9	119835745	119836332	162877	36	93	3	-5.91889	2.65845	RAD21
chr9	99619037	99619611	chr9	99871445	99871834	251834	242	52	5	-6.22131	2.62427	RAD21
chr16	57643336	57643946	chr16	57682316	57683527	38370	108	534	23	-4.69154	3.34365	RAD21
chr5	125689513	125690201	chr5	125874831	125875234	184630	305	291	33	-4.40062	4.3009	RAD21
chr5	125689513	125690201	chr5	125835536	125836013	145335	305	97	8	-6.13614	2.35953	RAD21
chr15	33173805	33174080	chr15	33248093	33248553	74013	43	120	5	-5.32982	2.85194	RAD21
chr3	193383671	193383812	chr3	194032882	194034073	649070	119	487	8	-6.8085	2.4241	RAD21
chr1	111325838	111326361	chr1	111372248	111373142	45887	294	181	21	-4.79303	3.27912	RAD21
chr1	150848584	150848835	chr1	150894719	150895464	45884	62	156	10	-4.57182	3.50265	RAD21
chr17	41955870	41956244	chr17	42118758	42119275	162514	59	83	3	-6.29915	2.26441	RAD21
chr20	32045775	32045941	chr20	32256155	32256461	210214	220	369	27	-4.71275	4.05172	RAD21
chr20	32045775	32045941	chr20	32255101	32256130	209160	220	338	27	-4.625	4.13889	RAD21
chr1	150997034	150997667	chr1	151128535	151129315	130868	105	148	7	-5.75935	2.67816	RAD21
chr5	149942504	149942746	chr5	150035814	150036712	93068	118	166	12	-4.91286	3.36309	RAD21
chr3	167097902	167098375	chr3	167599711	167600260	501336	85	111	6	-5.56866	3.56048	RAD21
chr3	167097902	167098375	chr3	167402034	167402719	303659	85	109	5	-5.91512	3.06037	RAD21
chr8	22831793	22832478	chr8	22862096	22862464	29618	160	59	5	-5.93384	2.07109	RAD21
chr2	113016908	113017516	chr2	113191140	113191392	173624	136	66	4	-6.32972	2.27565	RAD21
chr17	19417002	19417834	chr17	19665815	19666163	247981	211	79	5	-6.50243	2.32806	RAD21
chr17	19417002	19417834	chr17	19669637	19670210	251803	211	241	17	-5.17023	3.69194	RAD21
chr1	233734885	233735226	chr1	233811805	233812050	76579	66	45	5	-4.77744	3.42796	RAD21
chr19	41168700	41169395	chr19	41325632	41325905	156237	220	60	8	-5.32909	3.23957	RAD21
chr7	92157746	92158306	chr7	92218719	92218890	60413	80	46	3	-6.01344	2.09894	RAD21
chr5	55231742	55232407	chr5	55496673	55497447	264266	188	355	22	-4.92647	3.97079	RAD21
chr15	32954536	32955188	chr15	33286903	33287514	331715	220	148	13	-5.26094	3.76546	RAD21
chr2	191247527	191247934	chr2	191668769	191669367	420835	144	176	8	-5.98141	3.13113	RAD21
chr2	84722633	84723238	chr2	85085317	85085717	362079	174	96	9	-5.32895	3.73139	RAD21
chr19	3304988	3305368	chr19	3471918	3472341	166550	97	71	4	-6.0648	2.52247	RAD21
chr15	76020712	76021011	chr15	76094117	76094980	73106	65	192	10	-4.82671	3.36308	RAD21
chrX	106916168	106916624	chrX	106961285	106961701	44661	139	156	18	-4.20359	3.86808	RAD21
chr1	53951099	53951588	chr1	54220228	54220762	268640	110	63	5	-5.62474	3.27324	RAD21
chr3	133649239	133649568	chr3	133931688	133932157	282120	79	239	8	-5.68703	3.24176	RAD21
chr3	133649239	133649568	chr3	133930679	133931011	281111	79	208	9	-5.31254	3.61847	RAD21
chr3	52038278	52038558	chr3	52178076	52178735	139518	128	305	22	-4.39026	4.1272	RAD21
chr7	146942460	146942705	chr7	147780952	147781559	838247	34	141	5	-5.25624	3.85686	RAD21
chr2	47747820	47748766	chr2	47994788	47995491	246022	118	322	9	-6.15079	2.6801	RAD21
chr13	53239463	53239934	chr13	53383018	53383885	143084	62	178	10	-4.70375	3.82374	RAD21
chrX	73603458	73603870	chrX	73769857	73770479	165987	142	205	8	-6.11995	2.46331	RAD21
chr8	86376354	86376600	chr8	87045334	87045853	668734	207	116	5	-6.86743	2.37295	RAD21
chr4	164509126	164509377	chr4	164584767	164585063	75390	44	95	3	-6.14084	2.02776	RAD21
chr1	156426145	156426649	chr1	156577760	156578248	151111	157	249	13	-5.4438	3.09925	RAD21
chr1	156426145	156426649	chr1	156578705	156579328	152056	157	304	13	-5.64337	2.89743	RAD21
chr10	90923381	90923666	chr10	90967184	90967523	43518	35	58	3	-5.41857	2.63723	RAD21
chr16	88521749	88522138	chr16	88557141	88557341	35003	79	20	3	-5.16796	2.85161	RAD21
chr2	72150941	72151567	chr2	72806592	72807075	655025	67	105	4	-6.08606	3.09973	RAD21
chr16	29874796	29875099	chr16	30016757	30017176	141658	83	71	5	-5.46264	3.0353	RAD21
chr11	27716597	27716886	chr11	28719411	28719851	1002525	71	88	3	-6.54279	2.68371	RAD21
chr20	50744927	50745427	chr20	50836062	50836244	90635	155	28	4	-5.60304	2.64639	RAD21
chr11	119226957	119227728	chr11	119252165	119252597	24437	158	46	5	-5.67236	2.30974	RAD21
chr11	119226957	119227728	chr11	119345201	119345977	117473	158	218	26	-3.9309	4.48468	RAD21
chr19	17622127	17622374	chr19	17667089	17667358	44715	60	49	3	-5.78894	2.26839	RAD21
chr19	17622127	17622374	chr19	17666157	17666632	43783	60	40	3	-5.586	2.46953	RAD21
chr17	38716430	38716976	chr17	38771255	38771436	54279	248	191	14	-5.48759	2.61122	RAD21
chr11	120381664	120382544	chr11	120823342	120823882	440798	431	180	9	-6.86462	2.2844	RAD21
chr4	147164692	147164894	chr4	147254736	147255067	89842	248	79	8	-5.72399	2.51899	RAD21
chr4	147164692	147164894	chr4	147259769	147259959	94875	248	103	13	-5.01826	3.26426	RAD21
chr15	45813792	45814143	chr15	45903550	45903865	89407	50	148	5	-5.69036	2.55124	RAD21
chr11	102239247	102239682	chr11	102365496	102366740	125814	135	351	18	-4.98532	3.44733	RAD21
chr11	102239247	102239682	chr11	102405230	102405612	165548	135	46	3	-6.53669	2.03132	RAD21
chr9	112863904	112864167	chr9	112905161	112905466	40994	58	130	6	-5.34446	2.70117	RAD21
chr9	112863904	112864167	chr9	112906340	112906561	42173	58	144	5	-5.81138	2.23638	RAD21
chrX	133380238	133380879	chrX	133530224	133530633	149345	68	102	4	-6.07189	2.44382	RAD21
chr17	66259071	66259570	chr17	66432214	66432846	172644	127	138	5	-6.55256	2.04207	RAD21
chr17	66259071	66259570	chr17	66458786	66459526	199216	127	313	12	-5.62058	3.09096	RAD21
chr2	197036159	197036368	chr2	197065271	197065563	28903	121	74	5	-5.88098	2.1209	RAD21
chr11	34171429	34171628	chr11	34379527	34379769	207899	26	671	7	-5.87505	2.85521	RAD21
chr16	22207132	22207647	chr16	22308291	22308819	100644	78	162	9	-5.04986	3.25944	RAD21
chr5	60463220	60463788	chr5	60653620	60653899	189832	112	66	5	-5.68928	2.99054	RAD21
chr16	66928958	66929821	chr16	66962631	66962909	32810	152	38	5	-5.44259	2.56923	RAD21
chr1	156597232	156597491	chr1	156627216	156627677	29725	135	257	22	-4.27227	3.71279	RAD21
chr2	231577273	231577678	chr2	231662926	231664184	85248	132	275	10	-5.8944	2.32349	RAD21
chr9	124225278	124225711	chr9	124260329	124260816	34618	45	84	4	-5.46489	2.55423	RAD21
chr2	242447937	242448313	chr2	242576430	242576570	128117	66	69	3	-6.22654	2.18629	RAD21
chr11	110071985	110072472	chr11	110246947	110247840	174475	287	215	24	-4.67401	3.98724	RAD21
chr11	110071985	110072472	chr11	110304256	110304956	231784	287	136	8	-6.41325	2.37446	RAD21
chr11	110071985	110072472	chr11	110238223	110238758	165751	287	83	10	-5.47315	3.13017	RAD21
chr1	38492383	38492756	chr1	38537501	38537933	44745	135	111	8	-5.45592	2.60461	RAD21
chr1	38492383	38492756	chr1	38538703	38539019	45947	135	130	9	-5.37836	2.68789	RAD21
chr2	27946160	27946571	chr2	27994336	27995003	47765	53	48	3	-5.64427	2.42623	RAD21
chr2	27946160	27946571	chr2	27995083	27995261	48512	53	51	3	-5.70489	2.36772	RAD21
chr17	34308989	34309494	chr17	34475997	34476921	166503	92	434	10	-5.98966	2.59986	RAD21
chr18	12327942	12328452	chr18	12659735	12660272	331283	54	149	3	-6.79571	2.22602	RAD21
chr8	140418013	140418408	chr8	140642990	140643601	224582	138	112	8	-5.48687	3.2999	RAD21
chr2	237261615	237262168	chr2	237936021	237936480	673853	155	80	4	-6.65286	2.57359	RAD21
chr2	237261615	237262168	chr2	237980803	237981439	718635	155	208	8	-6.22208	2.97674	RAD21
chr10	59098892	59099281	chr10	59416879	59417251	317598	60	103	5	-5.5102	3.49475	RAD21
chr4	122821438	122822178	chr4	123498846	123499348	676668	259	267	10	-6.53891	2.68001	RAD21
chr4	122821438	122822178	chr4	123497814	123498367	675636	259	218	10	-6.33615	2.86859	RAD21
chr17	47645165	47645815	chr17	47928948	47929458	283133	209	39	3	-6.80867	2.10916	RAD21
chr7	25932369	25933013	chr7	26101185	26101653	168172	386	207	19	-5.39968	3.21546	RAD21
chr10	89610372	89611115	chr10	89976606	89977111	365491	124	81	3	-7.01751	2.05816	RAD21
chr4	185666946	185667604	chr4	185905018	185905601	237414	251	142	16	-4.9361	3.89369	RAD21
chr4	185666946	185667604	chr4	185828285	185828844	160681	251	117	12	-5.31781	3.26994	RAD21
chr11	86689729	86690415	chr11	87001125	87001810	310710	70	155	7	-5.4001	3.59386	RAD21
chr11	86689729	86690415	chr11	87002018	87002175	311603	70	179	7	-5.54406	3.45041	RAD21
chr22	30658828	30659219	chr22	30682810	30683183	23591	81	450	16	-4.95852	3.00246	RAD21
chr3	63336785	63337430	chr3	64009124	64009496	671694	127	52	3	-6.59821	2.62418	RAD21
chr3	194393221	194393361	chr3	194980254	194981560	586893	114	423	13	-5.65367	3.49695	RAD21
chr13	24495540	24495956	chr13	24794054	24795043	298098	85	300	10	-5.54126	3.42571	RAD21
chr11	8935926	8936483	chr11	8981014	8981544	44531	97	122	8	-5.21985	2.84193	RAD21
chr11	57298439	57298592	chr11	57412231	57412664	113639	47	159	4	-6.14646	2.20094	RAD21
chr16	58054641	58055023	chr16	58160903	58161196	105880	62	62	4	-5.48168	2.84328	RAD21
chr16	58054641	58055023	chr16	58155559	58156137	100536	62	97	4	-5.92926	2.36116	RAD21
chr7	154982127	154982911	chr7	155137197	155138208	154286	301	315	33	-4.46667	4.12104	RAD21
chr12	94534383	94534699	chr12	94827938	94828331	293239	137	122	6	-6.14048	2.80929	RAD21
chr6	43691151	43692234	chr6	44046719	44047284	354485	348	324	10	-7.02778	2.03158	RAD21
chr4	170192011	170192530	chr4	170407228	170407786	214698	206	292	9	-6.61018	2.1232	RAD21
chr4	170192011	170192530	chr4	170407048	170407191	214518	206	256	9	-6.4786	2.25719	RAD21
chr17	17258217	17258623	chr17	17544887	17545587	286264	294	190	18	-5.14986	3.7947	RAD21
chr17	17258217	17258623	chr17	17517018	17517306	258395	294	49	6	-5.99188	2.87473	RAD21
chr6	6057631	6058187	chr6	6546632	6547793	488445	239	444	22	-5.3902	3.72739	RAD21
chr22	41799731	41800369	chr22	41928975	41929584	128606	280	98	13	-5.08986	3.35392	RAD21
chr11	73115202	73115402	chr11	73371859	73372594	256457	73	375	10	-5.61222	3.25512	RAD21
chr11	73115202	73115402	chr11	73371437	73371725	256035	73	307	10	-5.41214	3.45718	RAD21
chr2	20861105	20861692	chr2	21185628	21186286	323936	268	181	20	-4.79802	4.2201	RAD21
chr2	20861105	20861692	chr2	21250434	21250675	388742	268	33	4	-6.31491	2.77959	RAD21
chr3	9544847	9545371	chr3	9768942	9769248	223571	133	55	5	-5.67881	3.1012	RAD21
chr3	9544847	9545371	chr3	9768720	9768867	223349	133	42	5	-5.40914	3.37591	RAD21
chr17	684457	685666	chr17	884267	884837	198601	51	136	3	-6.64726	2.03454	RAD21
chr9	15104792	15105184	chr9	15142935	15143262	37751	48	47	3	-5.52412	2.50763	RAD21
chr12	121151507	121152058	chr12	121409108	121410091	257050	220	282	11	-6.23974	2.61954	RAD21
chr12	113337686	113337845	chr12	113468530	113469234	130685	144	90	18	-3.68888	4.80096	RAD21
chrX	73603458	73603870	chrX	73755067	73755478	151197	142	115	6	-6.11724	2.40497	RAD21
chr17	9632226	9632782	chr17	9671926	9672280	39144	92	32	3	-5.7903	2.24644	RAD21
chr4	88274473	88275193	chr4	88386848	88387257	111655	121	161	9	-5.48275	2.86991	RAD21
chr11	63605557	63606118	chr11	63669217	63669385	63099	410	35	9	-5.17706	2.964	RAD21
chr11	63605557	63606118	chr11	63674026	63674426	67908	410	65	12	-5.22073	2.93817	RAD21
chr11	63605557	63606118	chr11	63639448	63639909	33330	410	59	14	-4.81558	3.19442	RAD21
chr11	63605557	63606118	chr11	63713045	63713632	106927	410	144	30	-4.18358	4.17422	RAD21
chr11	63605557	63606118	chr11	63713964	63714136	107846	410	158	28	-4.41434	3.94301	RAD21
chr11	63605557	63606118	chr11	63688610	63688891	82492	410	58	18	-4.29586	3.94447	RAD21
chr11	63605557	63606118	chr11	63706104	63706418	99986	410	56	8	-5.88263	2.40625	RAD21
chr15	69453973	69454266	chr15	69557604	69558018	103338	50	72	4	-5.4161	2.89817	RAD21
chr22	36541131	36541692	chr22	36576251	36576865	34559	121	211	19	-4.25877	3.75487	RAD21
chr5	128241163	128241773	chr5	128462319	128462671	220546	132	66	8	-4.91357	3.87438	RAD21
chr5	128241163	128241773	chr5	128461585	128461898	219812	132	60	8	-4.81826	3.96973	RAD21
chr15	72093258	72094072	chr15	72447799	72448947	353727	232	319	14	-5.93381	3.12019	RAD21
chr5	54640061	54640817	chr5	54987436	54988139	346619	98	182	5	-6.5701	2.47611	RAD21
chr11	67124194	67124907	chr11	67149730	67150486	24823	218	355	37	-4.03478	3.91244	RAD21
chr7	118909964	118910463	chr7	119912042	119913232	1001579	78	252	4	-7.11355	2.1701	RAD21
chr9	139379467	139379912	chr9	139538893	139539290	158981	182	158	10	-5.66143	2.90816	RAD21
chr9	139379467	139379912	chr9	139524681	139525192	144769	182	245	13	-5.57537	2.93458	RAD21
chr9	139379467	139379912	chr9	139525749	139526220	145837	182	288	13	-5.73707	2.77308	RAD21
chr11	94519710	94520033	chr11	94630373	94630829	110340	36	74	3	-5.69036	2.65146	RAD21
chr14	35342652	35343030	chr14	35450665	35450828	107635	60	73	3	-6.18758	2.13062	RAD21
chr20	57443838	57444175	chr20	57782775	57783240	338600	263	241	13	-5.92705	3.1074	RAD21
chr2	183105334	183105933	chr2	183451238	183451515	345305	91	61	4	-5.84914	3.19413	RAD21
chr12	118313470	118313614	chr12	118502426	118502589	188812	242	26	3	-6.54981	2.10166	RAD21
chr5	7887155	7887564	chr5	8184638	8184945	297074	68	46	3	-5.85092	3.11068	RAD21
chr1	101873093	101874053	chr1	101901577	101902030	27524	181	144	14	-4.8902	3.09081	RAD21
chr13	78167186	78167683	chr13	78325603	78325890	157920	142	278	31	-3.71547	4.91208	RAD21
chr13	78167186	78167683	chr13	78325914	78326491	158231	142	340	31	-3.9168	4.70565	RAD21
chr8	58135987	58136266	chr8	58255477	58256304	119211	62	250	7	-5.75678	2.62545	RAD21
chr1	81880058	81880612	chr1	82226126	82226551	345514	94	52	4	-5.72195	3.32141	RAD21
chr20	33124872	33125132	chr20	33296361	33297156	171229	93	253	6	-6.48247	2.10917	RAD21
chr20	33124872	33125132	chr20	33293259	33293424	168127	93	95	4	-6.31389	2.27143	RAD21
chr15	39464260	39464647	chr15	39872214	39872935	407567	51	261	8	-5.33746	3.75292	RAD21
chr1	90308775	90309346	chr1	90452642	90453367	143296	120	241	9	-5.87784	2.61596	RAD21
chr15	40401063	40401435	chr15	40453013	40453338	51578	152	94	6	-5.98366	2.09639	RAD21
chr6	157984711	157985120	chr6	158018587	158019146	33467	100	126	7	-5.54963	2.46543	RAD21
chr16	66549646	66550362	chr16	66623149	66623810	72787	128	167	8	-5.81114	2.35409	RAD21
chr6	14877335	14877605	chr6	14910716	14911393	33111	88	80	6	-5.27584	2.73607	RAD21
chr6	49499784	49500213	chr6	49574507	49575406	74294	109	132	14	-4.29604	3.91124	RAD21
chr9	134466495	134467042	chr9	134615263	134615885	148221	150	452	15	-5.70822	2.81386	RAD21
chr1	200589897	200590173	chr1	200639407	200639775	49234	156	120	7	-5.94553	2.12655	RAD21
chr1	200589897	200590173	chr1	200771641	200772580	181468	156	244	27	-3.95535	4.75033	RAD21
chr14	58967878	58968476	chr14	59041457	59041598	72981	152	15	3	-5.53471	2.63786	RAD21
chr20	799666	799928	chr20	936914	937884	136986	86	448	16	-5.01396	3.47283	RAD21
chr17	30788711	30789655	chr17	31081984	31082548	292329	114	137	6	-6.07266	2.8757	RAD21
chr1	175450062	175451194	chr1	175712710	175713113	261516	175	81	11	-4.76344	4.12948	RAD21
chr1	175450062	175451194	chr1	175857046	175857486	405852	175	78	4	-6.74891	2.36802	RAD21
chr13	103583941	103584262	chr13	103720259	103720471	135997	47	55	3	-5.66026	2.80408	RAD21
chr17	30810474	30810979	chr17	30935981	30936769	125002	212	151	10	-5.7687	2.64083	RAD21
chr17	37778136	37778798	chr17	37910090	37910954	131292	277	293	12	-6.33438	2.09027	RAD21
chr7	137588332	137588891	chr7	137692951	137693155	104060	286	377	62	-3.33397	5.02781	RAD21
chr4	126234503	126235020	chr4	128400087	128400644	2165067	148	60	5	-5.87268	3.23976	RAD21
chr4	126234503	126235020	chr4	128321885	128322342	2086865	148	119	4	-7.00375	2.25073	RAD21
chr4	126234503	126235020	chr4	127525447	127525745	1290427	148	44	3	-6.58418	2.63353	RAD21
chr6	47599123	47599642	chr6	47701869	47702445	102227	190	166	16	-4.81383	3.50786	RAD21
chr6	47599123	47599642	chr6	47748418	47748908	148776	190	145	15	-4.80766	3.74502	RAD21
chr1	9555261	9555785	chr1	9633760	9634096	77975	85	78	9	-4.40491	3.81471	RAD21
chr1	9555261	9555785	chr1	9633029	9633243	77244	85	74	9	-4.35227	3.86563	RAD21
chr5	179228764	179229276	chr5	179517391	179517716	288115	137	35	3	-6.2781	2.658	RAD21
chr5	179228764	179229276	chr5	179334595	179335196	105319	137	89	6	-5.8251	2.48987	RAD21
chr5	179228764	179229276	chr5	179285670	179286316	56394	137	77	6	-5.68027	2.42345	RAD21
chr17	38218725	38219402	chr17	38242633	38243167	23231	71	125	9	-4.69654	3.25565	RAD21
chr21	42655042	42655740	chr21	43198455	43198683	542715	322	30	3	-6.97852	2.23075	RAD21
chr3	15857167	15857757	chr3	16288562	16289457	430805	243	192	10	-6.14539	2.97778	RAD21
chr20	9388555	9389299	chr20	9590391	9590978	201092	241	190	26	-4.21563	4.53865	RAD21
chr2	69602687	69603312	chr2	69720580	69720729	117268	113	16	3	-5.30275	3.08061	RAD21
chr8	73232001	73232693	chr8	73759428	73759908	526735	102	117	6	-5.80363	3.34394	RAD21
chr8	56972438	56973014	chr8	57006076	57006638	33062	111	194	10	-5.37222	2.64013	RAD21
chr5	135585150	135586065	chr5	136105720	136106184	519655	184	147	5	-6.98649	2.2124	RAD21
chr5	135585150	135586065	chr5	135760508	135760929	174443	184	96	13	-4.64939	4.01256	RAD21
chr5	135585150	135586065	chr5	136021991	136022268	435926	184	28	3	-6.34992	2.78175	RAD21
chr7	14497366	14497850	chr7	14731064	14731662	233214	71	109	3	-6.7568	2.02831	RAD21
chr6	2209400	2209841	chr6	2353917	2354615	144076	63	236	6	-6.02345	2.46973	RAD21
chr1	112058788	112059075	chr1	112130338	112130508	71263	67	50	3	-5.91949	2.23688	RAD21
chr7	23610241	23610920	chr7	23751463	23752580	140543	335	332	40	-4.24151	4.28577	RAD21
chr13	21287099	21287242	chr13	21498706	21499412	211464	85	114	8	-5.01997	3.74053	RAD21
chr22	35439291	35439853	chr22	35546121	35546937	106268	108	226	8	-5.94378	2.37316	RAD21
chr22	35439291	35439853	chr22	35523092	35523301	83239	108	62	4	-6.03668	2.16928	RAD21
chr22	35439291	35439853	chr22	35536861	35537327	97008	108	171	8	-5.66491	2.61447	RAD21
chr5	175788551	175788951	chr5	175815474	175815787	26523	63	63	4	-5.51368	2.47344	RAD21
chr5	175788551	175788951	chr5	175815920	175816218	26969	63	70	4	-5.61904	2.37177	RAD21
chr7	5603096	5603514	chr7	5704818	5705443	101304	189	183	14	-5.17312	3.13668	RAD21
chr5	108255448	108256135	chr5	108814850	108815389	558715	87	107	3	-6.94151	2.27216	RAD21
chr3	37493229	37493738	chr3	37856086	37856453	362348	101	67	4	-6.04722	3.01786	RAD21
chr3	37493229	37493738	chr3	37821012	37821537	327274	101	111	7	-5.43283	3.58707	RAD21
chr16	24528303	24528714	chr16	24700386	24700833	171672	97	85	7	-5.12554	3.51147	RAD21
chr5	137785496	137786128	chr5	137839337	137839861	53209	141	121	17	-4.07812	4.04029	RAD21
chr19	35130421	35130917	chr19	35203541	35204063	72624	69	178	7	-5.52407	2.64724	RAD21
chr13	39625891	39626059	chr13	39837034	39837553	210975	132	96	9	-5.0527	3.70573	RAD21
chr5	133436172	133436316	chr5	133476137	133476529	39821	100	168	7	-5.83731	2.20175	RAD21
chr5	133436172	133436316	chr5	133477022	133477232	40706	100	191	7	-5.96562	2.07609	RAD21
chr11	61666527	61667013	chr11	61849174	61850121	182161	319	298	40	-4.08453	4.61924	RAD21
chr11	61666527	61667013	chr11	61875428	61875911	208415	319	149	19	-4.88026	3.87558	RAD21
chr1	109054992	109055739	chr1	109104253	109104902	48514	188	246	31	-3.8738	4.22283	RAD21
chr1	93903452	93904032	chr1	94278730	94278874	374698	153	449	18	-5.35672	3.71497	RAD21
chr1	247536067	247536354	chr1	247650178	247650892	113824	86	255	15	-4.57951	3.80355	RAD21
chr1	247536067	247536354	chr1	247649931	247650116	113577	86	198	14	-4.4645	3.9199	RAD21
chr1	247536067	247536354	chr1	247739871	247740234	203517	86	52	3	-6.20837	2.50057	RAD21
chr8	22287824	22288149	chr8	22419243	22419751	131094	174	172	11	-5.51076	2.93421	RAD21
chr19	32831211	32831607	chr19	33060981	33061515	229374	45	70	3	-5.85793	2.93412	RAD21
chr19	770305	770568	chr19	917513	918054	146945	115	224	10	-5.55141	2.96964	RAD21
chr8	53333448	53333856	chr8	53408574	53409261	74718	27	107	7	-4.07685	4.13733	RAD21
chr13	30996492	30996752	chr13	31019851	31020039	23099	53	59	3	-5.8506	2.13104	RAD21
chr14	50787528	50788242	chr14	50999854	51000219	211612	123	343	15	-5.23381	3.52209	RAD21
chr12	105673229	105673838	chr12	105776785	105777574	102947	144	290	27	-4.04802	4.29324	RAD21
chr2	139680531	139680927	chr2	139789481	139789729	108554	51	24	3	-4.91265	3.43741	RAD21
chr1	3369644	3370100	chr1	3535552	3535978	165452	85	101	4	-6.28518	2.29061	RAD21
chr3	98536289	98536913	chr3	98713024	98713361	176111	165	83	9	-5.13034	3.52192	RAD21
chr3	52777089	52777235	chr3	52833047	52833396	55812	222	66	10	-4.98716	3.12732	RAD21
chr22	35826862	35827200	chr22	35978834	35979525	151634	61	208	6	-5.86489	2.66712	RAD21
chr17	80309636	80310268	chr17	80372328	80372874	62060	249	160	25	-4.15488	4.00457	RAD21
chr2	38603691	38604090	chr2	38692843	38693268	88753	161	134	10	-5.37407	2.87118	RAD21
chr2	69786735	69787367	chr2	69941802	69942148	154435	212	206	22	-4.50238	4.08484	RAD21
chr13	108974538	108975295	chr13	109547469	109547959	572174	139	96	6	-5.9153	3.24766	RAD21
chr3	143691959	143692337	chr3	144014053	144014505	321716	217	59	4	-6.68485	2.32035	RAD21
chr3	141022191	141022857	chr3	141170527	141171343	147670	253	441	27	-5.03076	3.50979	RAD21
chr3	15313255	15313478	chr3	15402952	15403535	89474	66	139	5	-5.90525	2.33206	RAD21
chr10	34816048	34816304	chr10	34927235	34927884	110931	52	215	8	-5.163	3.19317	RAD21
chr10	34816048	34816304	chr10	34926372	34926948	110068	52	175	8	-4.95715	3.39933	RAD21
chr5	33588817	33589324	chr5	33933832	33935126	344508	104	343	12	-5.51231	3.52956	RAD21
chr5	33588817	33589324	chr5	33969541	33970437	380217	104	298	9	-5.94704	3.13539	RAD21
chr12	67749323	67750205	chr12	67835287	67836110	85082	250	126	9	-5.96329	2.25238	RAD21
chr14	97050473	97051011	chr14	97132516	97132763	81505	100	31	3	-5.84193	2.36054	RAD21
chr12	132379090	132379319	chr12	132414521	132414761	35202	43	56	3	-5.58933	2.43255	RAD21
chrX	8939214	8939693	chrX	9676957	9677489	737264	70	166	7	-5.46866	3.67231	RAD21
chr10	99223365	99223798	chr10	99313226	99313883	89428	81	102	10	-4.41425	3.85482	RAD21
chr19	47260386	47260991	chr19	47343789	47344101	82798	175	123	15	-4.56087	3.67502	RAD21
chr19	47260386	47260991	chr19	47328724	47329059	67733	175	47	6	-5.43141	2.72201	RAD21
chr19	47260386	47260991	chr19	47288066	47288282	27075	175	33	4	-5.8887	2.10719	RAD21
chr8	145597145	145597861	chr8	145634301	145635394	36440	180	205	10	-5.9108	2.11636	RAD21
chr9	119351663	119352124	chr9	119423215	119423795	71091	77	168	8	-5.30889	2.86102	RAD21
chr8	104776475	104777024	chr8	105142358	105142845	365334	133	93	6	-5.83943	3.22771	RAD21
chr15	31508595	31508844	chr15	31638808	31638972	129964	201	65	5	-6.25882	2.16171	RAD21
chr1	179090041	179090833	chr1	179163019	179163517	72186	131	80	7	-5.3654	2.8078	RAD21
chr1	179090041	179090833	chr1	179338839	179339375	248006	131	177	10	-5.44618	3.40164	RAD21
chr19	48992941	48993396	chr19	49087454	49087864	94058	76	198	11	-4.82321	3.45943	RAD21
chr2	119768949	119769501	chr2	120022662	120023123	253161	67	98	3	-6.59244	2.2509	RAD21
chr17	74117439	74118361	chr17	74275272	74276040	156911	401	399	58	-3.86204	4.75642	RAD21
chr15	44195790	44196475	chr15	44511549	44512203	315074	270	85	8	-5.88219	3.11602	RAD21
chr12	64943261	64943974	chr12	65091705	65092153	147731	199	195	34	-3.51358	5.07427	RAD21
chr8	18671662	18672145	chr8	18725792	18726368	53647	44	117	6	-4.96284	3.14248	RAD21
chr3	87949309	87949537	chr3	88054233	88054564	104696	35	117	3	-6.1203	2.18545	RAD21
chr3	87949309	87949537	chr3	88052232	88052955	102695	35	197	5	-5.61968	2.68726	RAD21
chr2	229997926	229998188	chr2	230138448	230138845	140260	45	67	3	-5.81413	2.66679	RAD21
chr7	21295867	21296614	chr7	21806843	21807323	510229	266	179	11	-5.97509	3.17471	RAD21
chr7	21295867	21296614	chr7	21608350	21608843	311736	266	123	16	-4.8505	4.14954	RAD21
chr7	21295867	21296614	chr7	21547206	21547562	250592	266	68	5	-6.58413	2.25227	RAD21
chr7	88176012	88176458	chr7	88464414	88464774	287956	99	50	6	-4.92362	4.02728	RAD21
chr12	104277902	104278574	chr12	104359406	104359629	80832	237	45	5	-6.05585	2.13894	RAD21
chr12	104277902	104278574	chr12	104324818	104325090	46244	237	114	11	-5.40847	2.65869	RAD21
chr12	104277902	104278574	chr12	104502571	104503602	223997	237	208	14	-5.52748	3.25686	RAD21
chr1	117116957	117117774	chr1	117215223	117215616	97449	305	85	13	-5.03306	3.26157	RAD21
chr1	18311021	18311461	chr1	18629264	18629869	317803	51	66	3	-5.92426	3.07842	RAD21
chr4	104985990	104986662	chr4	105781301	105782223	794639	176	407	21	-5.09025	4.01371	RAD21
chr16	3740398	3741002	chr16	3929826	3930366	188824	132	161	7	-6.07239	2.59301	RAD21
chr16	3740398	3741002	chr16	3929625	3929783	188623	132	135	6	-6.20456	2.45633	RAD21
chr9	127313989	127314606	chr9	127473928	127474576	159322	127	397	18	-5.04738	3.5434	RAD21
chr4	53242241	53243009	chr4	53849546	53850347	606537	107	310	12	-5.43959	3.70057	RAD21
chr4	53242241	53243009	chr4	53848699	53849198	605690	107	250	8	-6.03541	3.13998	RAD21
chr1	28417552	28418054	chr1	28535073	28536005	117019	209	305	38	-3.78747	4.62907	RAD21
chr6	34954487	34955051	chr6	35107401	35108422	152350	225	428	22	-5.29314	3.25999	RAD21
chr1	101386565	101387351	chr1	101903752	101904477	516401	184	310	8	-6.79262	2.39591	RAD21
chr6	75976287	75977014	chr6	76236135	76236757	259121	141	259	15	-5.08949	3.79261	RAD21
chr4	68854235	68854648	chr4	69041036	69041749	186388	56	102	4	-5.87774	2.78533	RAD21
chr9	90788355	90788707	chr9	91193208	91194021	404501	50	182	6	-5.53251	3.56004	RAD21
chr4	5401598	5401867	chr4	5814590	5814994	412723	57	117	3	-6.608	2.51214	RAD21
chr4	5401598	5401867	chr4	5461805	5462149	59938	57	37	3	-5.45674	2.66572	RAD21
chr4	5401598	5401867	chr4	5791991	5792350	390124	57	61	3	-5.9567	3.13376	RAD21
chr5	126011782	126012224	chr5	126115899	126116518	103675	317	284	37	-4.18604	4.15583	RAD21
chr1	65329819	65330144	chr1	65431572	65431783	101428	59	102	4	-5.92992	2.36459	RAD21
chr1	65329819	65330144	chr1	65432306	65432535	102162	59	117	4	-6.06712	2.22791	RAD21
chr15	84240833	84241212	chr15	84703610	84704722	462398	71	254	5	-6.58114	2.57111	RAD21
chr4	160026037	160026264	chr4	160096440	160097316	70176	127	324	11	-5.82914	2.32492	RAD21
chr21	45566992	45567447	chr21	45717173	45717850	149726	255	270	11	-6.34389	2.16495	RAD21
chr20	39763818	39764259	chr20	39860554	39860801	96295	179	96	6	-6.16822	2.09723	RAD21
chr1	210316725	210317199	chr1	210573719	210574346	256520	100	140	5	-6.32794	2.52859	RAD21
chr6	31648303	31649563	chr6	31737472	31737929	87909	351	165	14	-5.68862	2.54587	RAD21
chr1	74983004	74983450	chr1	75154912	75155130	171462	56	218	7	-5.51803	3.10557	RAD21
chr3	132254794	132255162	chr3	132360970	132361568	105808	76	128	17	-3.51634	4.8502	RAD21
chr10	97049484	97049625	chr10	97122811	97123629	73186	88	446	14	-5.29954	2.87944	RAD21
chrX	131426722	131427451	chrX	131597530	131597791	170079	157	63	4	-6.42679	2.16232	RAD21
chrX	131426722	131427451	chrX	131746971	131747361	319520	157	133	14	-4.66848	4.34447	RAD21
chrX	131426722	131427451	chrX	131749403	131749681	321952	157	107	8	-5.57019	3.44127	RAD21
chr12	68043669	68043838	chr12	68331715	68331980	287877	152	51	4	-6.18312	2.75348	RAD21
chr14	105837190	105837675	chr14	105994599	105995047	156924	145	145	7	-6.06165	2.4865	RAD21
chr20	4089213	4089844	chr20	4153007	4153766	63163	297	209	36	-3.86903	4.30134	RAD21
chr2	113932104	113932317	chr2	113956663	113957005	24346	60	46	4	-5.1504	2.81919	RAD21
chr16	27192464	27192640	chr16	27378810	27379866	186170	183	296	11	-6.10406	2.5516	RAD21
chr19	49810071	49810331	chr19	49843595	49843890	33264	40	41	3	-5.20523	2.8069	RAD21
chr5	95205299	95205552	chr5	95263924	95264072	58372	54	64	4	-5.37528	2.74254	RAD21
chr1	205198610	205198994	chr1	205224881	205225046	25887	94	158	9	-5.21144	2.76705	RAD21
chr8	98852133	98852538	chr8	99049307	99049850	196769	95	223	7	-6.06923	2.6225	RAD21
chr17	46055753	46056457	chr17	46088608	46089140	32151	195	69	7	-5.61529	2.39528	RAD21
chr16	83146974	83147218	chr16	83249030	83249436	101812	25	98	3	-5.60662	2.69646	RAD21
chr2	200850350	200850795	chr2	201346007	201346429	495212	46	139	3	-6.56589	2.60157	RAD21
chr12	121236180	121236376	chr12	121285638	121285972	49262	75	62	4	-5.67203	2.40391	RAD21
chr16	57126343	57127235	chr16	57201799	57202325	74564	97	200	12	-4.90322	3.2909	RAD21
chr12	50482326	50482832	chr12	50708515	50709111	225683	109	182	5	-6.67648	2.08881	RAD21
chr5	173052518	173053301	chr5	173352222	173352389	298921	207	145	7	-6.41763	2.54256	RAD21
chr5	173052518	173053301	chr5	173352420	173352979	299119	207	174	8	-6.33289	2.62858	RAD21
chr3	190854148	190854515	chr3	191116439	191116737	261924	91	50	4	-5.65029	3.23054	RAD21
chr12	83079206	83080510	chr12	83398417	83398709	317907	278	47	4	-6.70518	2.29278	RAD21
chr12	83079206	83080510	chr12	84891576	84891931	1811066	278	60	4	-6.94938	2.29837	RAD21
chr17	56394710	56395316	chr17	56421692	56422548	26376	186	159	14	-5.01654	2.96064	RAD21
chr9	92218749	92218929	chr9	92864461	92865008	645532	266	229	16	-5.47204	3.67272	RAD21
chr9	92218749	92218929	chr9	92681463	92681974	462534	266	76	12	-4.94442	4.15285	RAD21
chr5	180618837	180619027	chr5	180644619	180644916	25592	52	62	3	-5.88115	2.10964	RAD21
chr9	21812968	21814418	chr9	22008530	22009010	194112	608	137	14	-6.05204	2.63157	RAD21
chr9	21812968	21814418	chr9	22009165	22009496	194747	608	165	13	-6.38622	2.29009	RAD21
chr9	21812968	21814418	chr9	22037983	22038694	223565	608	209	28	-5.0881	3.70427	RAD21
chr19	15212283	15212649	chr19	15261220	15261594	48571	37	77	6	-4.3712	3.71919	RAD21
chr5	1763718	1764273	chr5	2017743	2018118	253470	138	64	4	-6.31355	2.535	RAD21
chr3	46968835	46969012	chr3	47039859	47040409	70847	108	189	7	-6.03206	2.12	RAD21
chr7	108143860	108144025	chr7	108210908	108211167	66883	32	72	3	-5.54518	2.60233	RAD21
chr1	211496729	211497455	chr1	211649486	211649988	152031	230	90	10	-5.33272	3.21779	RAD21
chr1	211496729	211497455	chr1	211526165	211526706	28710	230	98	23	-3.75206	4.21923	RAD21
chr12	25005295	25005841	chr12	25112739	25113062	106898	69	103	5	-5.64996	2.67627	RAD21
chr12	25005295	25005841	chr12	25113205	25113782	107364	69	125	5	-5.84354	2.48076	RAD21
chr1	211643456	211643791	chr1	211687260	211687721	43469	60	235	6	-5.97041	2.08088	RAD21
chr19	45595982	45596646	chr19	45634328	45634590	37682	113	35	4	-5.51015	2.52133	RAD21
chr17	77818555	77818958	chr17	77944427	77944817	125469	77	102	6	-5.38526	3.03589	RAD21
chr4	122871244	122872019	chr4	123497814	123498367	625795	166	218	7	-6.60466	2.60966	RAD21
chr4	122871244	122872019	chr4	123498846	123499348	626827	166	267	7	-6.80742	2.41981	RAD21
chr10	120730714	120731217	chr10	120788866	120789066	57649	59	58	3	-5.94076	2.1627	RAD21
chr2	65159521	65159969	chr2	65214452	65214630	54483	105	91	5	-5.94594	2.14548	RAD21
chr3	153813627	153814003	chr3	153970653	153971327	156650	40	129	3	-6.35147	2.18626	RAD21
chr12	94527498	94528525	chr12	94827938	94828331	299413	178	122	7	-6.09398	2.87049	RAD21
chr12	94527498	94528525	chr12	94827773	94827913	299248	178	97	7	-5.86467	3.10166	RAD21
chr12	94527498	94528525	chr12	94919728	94920065	391203	178	31	3	-6.41855	2.67963	RAD21
chr2	157191881	157192465	chr2	157445902	157446869	253437	264	320	20	-5.35281	3.51071	RAD21
chr13	53542147	53542592	chr13	53725737	53726355	183145	119	91	4	-6.51739	2.11563	RAD21
chr7	154718885	154719963	chr7	155009409	155009603	289446	269	69	5	-6.60994	2.3257	RAD21
chr7	154718885	154719963	chr7	155008600	155008859	288637	269	57	5	-6.41889	2.51691	RAD21
chr2	213880575	213880825	chr2	214016916	214017103	136091	105	232	7	-6.20888	2.24111	RAD21
chr17	40761657	40761805	chr17	40825949	40826258	64144	94	87	5	-5.79033	2.3411	RAD21
chr20	17551084	17551423	chr20	17592114	17592297	40691	93	35	3	-5.89072	2.15126	RAD21
chrX	130988660	130988970	chrX	131205053	131205710	216083	54	107	3	-6.46459	2.27633	RAD21
chr8	139490992	139491380	chr8	139698674	139699112	207294	41	122	5	-5.29872	3.44395	RAD21
chr4	71181723	71181977	chr4	71370777	71371392	188800	52	165	11	-4.2614	4.45661	RAD21
chrX	43208691	43209061	chrX	43419000	43419245	209939	67	87	3	-6.47338	2.24853	RAD21
chr12	111331949	111332668	chr12	111736672	111736937	404004	215	63	7	-5.62195	3.47201	RAD21
chr1	145524722	145525201	chr1	145588487	145589082	63286	50	130	8	-4.62067	3.53349	RAD21
chr19	50321455	50321884	chr19	50370770	50370967	48886	41	61	3	-5.62722	2.44787	RAD21
chr1	59247349	59247940	chr1	59510737	59511030	262797	151	67	4	-6.44938	2.42194	RAD21
chr2	72098792	72099031	chr2	72377432	72377874	278401	24	112	3	-5.69933	3.22075	RAD21
chr17	41471233	41471830	chr17	41560753	41561446	88923	211	381	47	-3.59436	4.68995	RAD21
chr18	2932095	2932932	chr18	2985525	2986165	52593	285	205	27	-4.38383	3.72638	RAD21
chr15	76934945	76935479	chr15	77132799	77133677	197320	54	143	5	-5.73295	2.96978	RAD21
chr2	121011271	121011550	chr2	121045289	121045491	33739	102	52	4	-5.80363	2.21389	RAD21
chr16	86597285	86598004	chr16	87096210	87096623	498206	334	65	9	-5.59108	3.53783	RAD21
chr9	102790231	102791181	chr9	102978182	102979054	187001	392	297	42	-4.18965	4.52514	RAD21
chr7	23397105	23398038	chr7	23578935	23579101	180897	197	29	3	-6.45327	2.17394	RAD21
chr3	145936520	145937175	chr3	146295354	146295860	358179	131	126	9	-5.31703	3.73925	RAD21
chr7	23397105	23398038	chr7	23502488	23502812	104450	197	81	8	-5.51877	2.79859	RAD21
chr2	95688762	95689185	chr2	95719158	95719735	29973	243	93	21	-3.93662	4.04606	RAD21
chr2	95688762	95689185	chr2	95745775	95746006	56590	243	49	13	-4.25498	3.87712	RAD21
chr10	47599407	47600381	chr10	47696315	47696575	95934	141	30	3	-6.15273	2.11126	RAD21
chr6	108862687	108862851	chr6	109394479	109395063	531628	315	170	15	-5.47227	3.66096	RAD21
chrX	11805606	11806189	chrX	11926444	11926939	120255	91	111	5	-6.00151	2.37996	RAD21
chr20	1305789	1306225	chr20	1373618	1373828	67393	79	52	5	-5.10182	3.05774	RAD21
chr15	70755548	70755770	chr15	70779205	70779658	23435	77	286	11	-5.20401	2.76235	RAD21
chr1	20559911	20560292	chr1	20820056	20820764	259764	43	192	3	-6.82147	2.03627	RAD21
chr2	61245039	61245471	chr2	61403806	61404629	158335	97	95	6	-5.54507	3.02556	RAD21
chr16	10609091	10609248	chr16	10832153	10832468	222905	206	307	21	-4.96568	3.82752	RAD21
chr16	10609091	10609248	chr16	10831626	10831781	222378	206	288	23	-4.71985	4.07715	RAD21
chr16	10609091	10609248	chr16	10830771	10831311	221523	206	259	24	-4.5286	4.27021	RAD21
chr5	83570718	83571105	chr5	85975137	85975744	2404032	49	115	3	-6.43953	2.74368	RAD21
chr6	150740150	150740466	chr6	151062770	151063329	322304	296	145	12	-5.69728	3.31407	RAD21
chr6	150740150	150740466	chr6	151136193	151136743	395727	296	285	37	-4.12101	4.94348	RAD21
chr12	55247583	55248393	chr12	55329075	55329508	80682	227	64	9	-5.18938	3.02383	RAD21
chr8	19786399	19786778	chr8	19991165	19991651	204387	60	201	4	-6.62506	2.0759	RAD21
chr8	19786399	19786778	chr8	19971477	19971689	184699	60	21	3	-4.94164	3.74389	RAD21
chr5	53539311	53539750	chr5	53715359	53715812	175609	147	84	13	-4.29135	4.38583	RAD21
chr16	69344915	69345408	chr16	69373314	69373798	27906	62	57	3	-5.97296	2.02702	RAD21
chr12	70273102	70273585	chr12	71113556	71114048	839971	175	73	3	-7.25802	2.03054	RAD21
chr12	70273102	70273585	chr12	71123797	71124074	850212	175	50	5	-5.85793	3.30747	RAD21
chr11	118015958	118016651	chr11	118042300	118042793	25649	208	110	13	-4.90812	3.06305	RAD21
chr8	53490261	53490782	chr8	53853920	53854745	363138	94	225	12	-4.98958	4.06964	RAD21
chr8	53490261	53490782	chr8	53836707	53836954	345925	94	43	3	-6.10727	2.93719	RAD21
chr20	30147914	30148203	chr20	30200633	30201030	52430	61	369	10	-5.4165	2.67597	RAD21
chr8	142398404	142398562	chr8	142441385	142441974	42823	405	263	56	-3.52534	4.54084	RAD21
chr12	40404764	40405376	chr12	40501249	40501701	95873	90	76	11	-4.03475	4.27311	RAD21
chr12	103384449	103384602	chr12	103496629	103496913	112027	26	45	3	-4.86753	3.50042	RAD21
chr14	93055603	93056017	chr14	93147250	93147971	91233	86	273	12	-5.09401	3.16918	RAD21
chr1	59247980	59248303	chr1	59510737	59511030	262434	201	67	5	-6.28912	2.5836	RAD21
chrX	46404560	46405133	chrX	46432746	46432974	27613	63	97	4	-5.94526	2.05335	RAD21
chr20	43312145	43312719	chr20	43361915	43362486	49196	426	286	43	-4.18803	3.90803	RAD21
chr11	103552938	103553692	chr11	103791717	103791963	238025	161	33	5	-5.35904	3.46462	RAD21
chr11	103552938	103553692	chr11	104022044	104022556	468352	161	87	7	-5.65549	3.46711	RAD21
chr5	173213487	173214204	chr5	173352420	173352979	138216	196	174	9	-6.04272	2.42188	RAD21
chr5	173213487	173214204	chr5	173352222	173352389	138018	196	145	9	-5.8604	2.6083	RAD21
chr11	34388087	34388510	chr11	34513971	34514979	125461	81	189	22	-3.45411	5.01431	RAD21
chr13	85491445	85491776	chr13	86380621	86381349	888845	49	101	5	-5.28806	3.82353	RAD21
chr12	120426765	120427120	chr12	120524516	120525428	97396	72	136	9	-4.79487	3.50446	RAD21
chr22	19667168	19667426	chr22	19705467	19705912	38041	37	59	3	-5.49123	2.5417	RAD21
chr1	59205405	59206183	chr1	60224778	60225543	1018595	215	199	8	-6.50506	2.71725	RAD21
chr1	59205405	59206183	chr1	60164586	60165380	958403	215	267	17	-5.29146	3.81405	RAD21
chr3	33172889	33173868	chr3	33360005	33360213	186137	288	41	4	-6.60394	2.03678	RAD21
chr3	33172889	33173868	chr3	33360535	33360819	186667	288	41	4	-6.60394	2.0386	RAD21
chr2	175901187	175901666	chr2	176046387	176046622	144721	57	74	3	-6.14989	2.34251	RAD21
chr11	102212388	102212928	chr11	102536967	102537704	324039	156	150	6	-6.47697	2.53341	RAD21
chr20	44761245	44761666	chr20	44803199	44803528	41533	154	118	11	-5.01185	3.03788	RAD21
chr7	37771824	37772552	chr7	37871745	37872539	99193	204	397	14	-6.02394	2.25834	RAD21
chr15	78600690	78601263	chr15	78715174	78715587	113911	114	74	4	-6.26767	2.0783	RAD21
chr8	23019288	23020037	chr8	23146003	23146143	125966	234	118	12	-5.25619	3.17054	RAD21
chr8	23019288	23020037	chr8	23145281	23145794	125244	234	107	12	-5.15834	3.26726	RAD21
chr8	23019288	23020037	chr8	23103737	23104571	83700	234	154	11	-5.69648	2.51884	RAD21
chr8	23019288	23020037	chr8	23267720	23268278	247683	234	192	9	-6.31837	2.51431	RAD21
chr16	16054999	16055406	chr16	16101699	16102042	46293	51	37	4	-4.77015	3.30419	RAD21
chr10	13701732	13702764	chr10	13819182	13819804	116418	289	325	53	-3.50967	4.91014	RAD21
chr10	13701732	13702764	chr10	13820012	13820555	117248	289	381	53	-3.66864	4.75176	RAD21
chr1	7727566	7728012	chr1	7962772	7963104	234760	116	81	6	-5.56452	3.24715	RAD21
chr7	128544641	128545319	chr7	128579848	128580891	34529	167	113	8	-5.6865	2.33324	RAD21
chr13	32841919	32842578	chr13	32884117	32884724	41539	87	108	5	-5.92916	2.11563	RAD21
chr17	47572587	47572756	chr17	47634773	47635224	62017	110	337	13	-5.39066	2.74143	RAD21
chr17	47572587	47572756	chr17	47633501	47634074	60745	110	286	12	-5.38666	2.74052	RAD21
chr17	34303088	34303427	chr17	34475997	34476921	172570	113	434	16	-5.25525	3.38079	RAD21
chr10	125343139	125343611	chr10	125727143	125727743	383532	229	241	39	-3.5914	5.46423	RAD21
chr1	42277682	42277981	chr1	42333931	42334820	55950	153	183	12	-5.27011	2.83962	RAD21
chr18	12726986	12727431	chr18	13159245	13160095	431814	184	146	6	-6.61502	2.52101	RAD21
chr15	45751008	45751431	chr15	45906290	45906715	154859	481	197	34	-4.40635	4.18577	RAD21
chr15	45751008	45751431	chr15	45903550	45903865	152119	481	148	29	-4.43849	4.14063	RAD21
chr1	28184468	28185153	chr1	28305789	28306580	120636	259	81	14	-4.67316	3.74117	RAD21
chr4	38904155	38905052	chr4	39136476	39137263	231424	305	319	39	-4.15838	4.67199	RAD21
chr4	38904155	38905052	chr4	39412107	39412477	507055	305	35	3	-7.07844	2.11743	RAD21
chr3	46746437	46747100	chr3	46936594	46937249	189494	226	216	19	-4.90694	3.79445	RAD21
chr3	46746437	46747100	chr3	46896308	46896491	149208	226	23	3	-6.3588	2.14734	RAD21
chr3	155868201	155868777	chr3	156167795	156168220	299018	317	109	6	-6.86673	2.08929	RAD21
chr1	152850535	152850830	chr1	152896768	152896951	45938	45	68	3	-5.82895	2.23251	RAD21
chr1	152850535	152850830	chr1	152898363	152899026	47533	45	286	7	-5.57083	2.49966	RAD21
chr10	31997588	31997895	chr10	32059239	32059822	61344	143	142	10	-5.3135	2.81764	RAD21
chr3	121443065	121443259	chr3	121554948	121555257	111689	33	155	4	-5.76734	2.57923	RAD21
chr7	18397436	18397613	chr7	18610509	18610851	212896	92	67	6	-5.14296	3.61854	RAD21
chr7	18397436	18397613	chr7	18705686	18706154	308073	92	129	4	-6.60901	2.36984	RAD21
chrX	152804915	152805293	chrX	152934745	152934994	129452	86	135	8	-5.20074	3.24433	RAD21
chr19	17190718	17191244	chr19	17236124	17236749	44880	90	88	6	-5.39363	2.66804	RAD21
chr19	17190718	17191244	chr19	17236910	17237379	45666	90	109	6	-5.60764	2.45509	RAD21
chr11	17405352	17405879	chr11	17526032	17526537	120153	143	185	16	-4.63802	3.77473	RAD21
chr10	2970295	2971039	chr10	3020118	3020869	49079	162	120	17	-4.20866	3.88651	RAD21
chr20	37678494	37679248	chr20	37709706	37710174	30458	262	122	12	-5.40255	2.59933	RAD21
chr8	101859265	101860140	chr8	101950475	101951331	90335	226	154	19	-4.56861	3.70147	RAD21
chr16	49441706	49442446	chr16	49626738	49627117	184292	205	118	8	-5.93481	2.71965	RAD21
chr9	112669013	112669960	chr9	112820430	112821053	150470	246	313	12	-6.28172	2.23224	RAD21
chr5	79641883	79642311	chr5	79967841	79968397	325530	54	139	4	-6.15087	2.86349	RAD21
chr5	79641883	79642311	chr5	79952381	79952607	310070	54	55	3	-5.79909	3.19048	RAD21
chr10	72024852	72025313	chr10	72123925	72124732	98612	82	329	16	-4.6576	3.65037	RAD21
chr18	76635552	76635801	chr18	77006455	77007092	370654	36	141	3	-6.33505	2.74183	RAD21
chr10	7567219	7567924	chr10	7728939	7729643	161015	238	200	26	-4.25439	4.36908	RAD21
chr16	55746143	55746596	chr16	55876682	55877195	130086	89	141	20	-3.44593	5.04704	RAD21
chr11	120903214	120903595	chr11	120982895	120983657	79300	53	168	5	-5.87538	2.31658	RAD21
chr6	123051850	123052475	chr6	123161043	123161209	108568	133	64	6	-5.46571	2.87249	RAD21
chr6	123051850	123052475	chr6	123159305	123159591	106830	133	75	7	-5.31602	3.01704	RAD21
chrX	18692472	18692725	chrX	18904239	18904884	211514	52	128	4	-6.03069	2.70636	RAD21
chr10	14598357	14598760	chr10	14625266	14625521	26506	108	47	5	-5.3134	2.66994	RAD21
chr19	51208739	51209026	chr19	51286653	51287198	77627	70	189	9	-5.09579	3.10663	RAD21
chr15	75149477	75150152	chr15	75193813	75194489	43661	54	166	7	-5.20915	2.84891	RAD21
chr1	32985942	32986371	chr1	33238517	33239047	252146	174	128	8	-5.8522	3.00006	RAD21
chr1	154933954	154934839	chr1	154989632	154990590	54793	92	150	6	-5.9489	2.14362	RAD21
chr19	4575941	4576380	chr19	4633326	4633476	56946	68	26	5	-4.25873	3.87506	RAD21
chr9	138756215	138756942	chr9	138852733	138853302	95791	119	68	4	-6.22604	2.03572	RAD21
chr13	29379454	29379769	chr13	29937057	29937591	557288	30	148	3	-6.20119	2.97378	RAD21
chr4	123230767	123230911	chr4	123497814	123498367	266903	68	218	14	-4.32589	4.58629	RAD21
chr4	123230767	123230911	chr4	123498846	123499348	267935	68	267	14	-4.52864	4.38306	RAD21
chr6	10528827	10529206	chr6	10694651	10695870	165445	61	114	5	-5.6282	2.96888	RAD21
chr4	87855949	87856383	chr4	87928026	87928256	71643	143	153	9	-5.59883	2.56661	RAD21
chr15	81398237	81398434	chr15	81549324	81549682	150890	156	36	5	-5.4145	3.12852	RAD21
chr4	108951466	108951993	chr4	109494144	109494319	542151	143	238	18	-4.65437	4.44068	RAD21
chr4	108951466	108951993	chr4	109493724	109494021	541731	143	220	18	-4.57573	4.51546	RAD21
chr4	108951466	108951993	chr4	109493319	109493506	541326	143	211	18	-4.53396	4.55518	RAD21
chr4	108951466	108951993	chr4	109414016	109414652	462023	143	134	6	-6.27717	2.86472	RAD21
chr4	108951466	108951993	chr4	109413625	109413765	461632	143	109	6	-6.07067	3.06416	RAD21
chr7	69507560	69507700	chr7	69626444	69627064	118744	82	141	6	-5.77196	2.6077	RAD21
chr11	9883448	9884173	chr11	9994353	9994962	110180	123	208	24	-3.79361	4.58872	RAD21
chr11	86580930	86581481	chr11	86630583	86631068	49102	78	60	8	-4.29217	3.80199	RAD21
chr17	26132392	26133128	chr17	26206459	26207478	73331	252	305	44	-3.68136	4.5364	RAD21
chr17	26132392	26133128	chr17	26195695	26195846	62567	252	20	4	-5.75257	2.37367	RAD21
chr2	113357529	113358458	chr2	113482526	113482704	124068	246	162	13	-5.46303	2.94943	RAD21
chr2	113357529	113358458	chr2	113483682	113483847	125224	246	517	45	-4.14005	4.31034	RAD21
chr2	113357529	113358458	chr2	113484025	113484689	125567	246	604	46	-4.25162	4.1978	RAD21
chr1	41779325	41779636	chr1	41882610	41883240	102974	40	187	5	-5.70111	2.60542	RAD21
chr19	41955267	41955881	chr19	42044102	42044501	88221	238	118	12	-5.27314	2.97177	RAD21
chr18	32987711	32988302	chr18	33091657	33092118	103355	176	63	6	-5.7301	2.57761	RAD21
chr4	65024460	65024870	chr4	65404823	65405336	379953	80	141	5	-6.11191	2.97217	RAD21
chr9	103363429	103363798	chr9	104073696	104074341	709898	91	168	9	-5.24037	3.88586	RAD21
chr4	175143406	175143900	chr4	175240265	175240847	96365	80	146	8	-5.20675	3.07906	RAD21
chr5	146843831	146844153	chr5	146938463	146938757	94310	22	51	3	-4.82564	3.45817	RAD21
chr18	29851627	29852139	chr18	30132352	30132784	280213	92	144	5	-6.27273	2.64445	RAD21
chr18	29851627	29852139	chr18	30129261	30129537	277122	92	66	3	-6.51422	2.39248	RAD21
chr3	155868201	155868777	chr3	156100327	156100645	231550	317	106	12	-5.45253	3.35311	RAD21
chr2	166257800	166258249	chr2	166730939	166731593	472690	82	199	5	-6.48115	2.67223	RAD21
chr12	56519907	56520502	chr12	56551610	56552278	31108	138	66	6	-5.53339	2.47247	RAD21
chr12	56519907	56520502	chr12	56583231	56583598	62729	138	140	11	-5.07311	3.0688	RAD21
chr8	32411565	32411729	chr8	32963904	32964658	552175	64	204	10	-4.87183	4.2344	RAD21
chr1	110750362	110750924	chr1	111002793	111003268	251869	169	261	11	-5.89863	2.95216	RAD21
chr1	110750362	110750924	chr1	110997876	110998094	246952	169	36	4	-5.94083	2.89606	RAD21
chr1	110750362	110750924	chr1	110805495	110805775	54571	169	31	5	-5.34501	2.75755	RAD21
chr18	11826940	11827129	chr18	11995150	11996025	168021	27	219	3	-6.48768	2.09159	RAD21
chr7	29995782	29996069	chr7	30101432	30102721	105363	51	248	8	-5.28637	3.04028	RAD21
chr5	114645315	114646064	chr5	114910148	114910444	264084	192	72	7	-5.64234	3.24407	RAD21
chr5	114645315	114646064	chr5	114910632	114910941	264568	192	87	7	-5.83158	3.05331	RAD21
chr5	114645315	114646064	chr5	114921687	114922743	275623	192	240	15	-5.32203	3.59657	RAD21
chr17	32052700	32053133	chr17	32078068	32078619	24935	44	105	9	-4.0437	3.90456	RAD21
chr13	39719052	39719680	chr13	40186115	40186588	466435	139	129	4	-7.0217	2.14764	RAD21
chr13	39719052	39719680	chr13	40176521	40177103	456841	139	54	3	-6.72623	2.42805	RAD21
chr13	39719052	39719680	chr13	39837034	39837553	117354	139	96	6	-5.9153	2.45455	RAD21
chr14	65569742	65569896	chr14	65623465	65623728	53569	69	47	3	-5.88703	2.202	RAD21
chr4	103541815	103542214	chr4	103930266	103930776	388052	118	231	12	-5.24329	3.83563	RAD21
chr21	16434984	16435217	chr21	16855315	16856013	420098	96	227	5	-6.77042	2.35992	RAD21
chr14	69378098	69378795	chr14	69574033	69574562	195238	175	77	7	-5.61677	3.0827	RAD21
chr14	69378098	69378795	chr14	69468875	69469052	90080	175	33	5	-5.44242	2.80775	RAD21
chr14	69378098	69378795	chr14	69556721	69556873	177926	175	71	7	-5.53565	3.10994	RAD21
chr1	37468648	37468789	chr1	37789217	37789682	320428	18	241	3	-6.17794	2.82773	RAD21
chr17	42287266	42288202	chr17	42422440	42422690	134238	288	99	9	-5.86363	2.58685	RAD21
chr17	42287266	42288202	chr17	42422950	42423446	134748	288	117	9	-6.03069	2.41777	RAD21
chr5	142301578	142302197	chr5	143347423	143348001	1045226	170	148	5	-6.91413	2.34936	RAD21
chr2	182825926	182826170	chr2	182942239	182942680	116069	38	131	3	-6.31556	2.03928	RAD21
chr2	175613514	175614043	chr2	175641015	175641212	26972	153	47	10	-4.27542	3.69184	RAD21
chr2	175613514	175614043	chr2	175901187	175901666	287144	153	57	3	-6.87626	2.05074	RAD21
chr1	202470435	202470775	chr1	202540902	202541298	70127	45	125	4	-5.86239	2.29071	RAD21
chr9	37913461	37914286	chr9	38068678	38069041	154392	368	86	9	-5.96798	2.57248	RAD21
chr6	137415276	137416262	chr6	137635024	137636044	218762	464	446	25	-5.80245	2.96117	RAD21
chr6	33421604	33422506	chr6	33547923	33548206	125417	73	79	4	-5.88732	2.52128	RAD21
chr12	97543210	97543427	chr12	97702378	97702754	158951	159	70	6	-5.73388	2.83326	RAD21
chr1	230259540	230259852	chr1	230303164	230303577	43312	73	204	6	-6.02506	2.02527	RAD21
chr10	28072704	28072881	chr10	28468276	28468925	395395	23	148	3	-5.93548	3.15848	RAD21
chr10	28072704	28072881	chr10	28467466	28467799	394585	23	121	3	-5.73406	3.3561	RAD21
chr3	194406552	194406738	chr3	194980254	194981560	573516	99	423	6	-7.05897	2.16622	RAD21
chr11	65989997	65990496	chr11	66024934	66025336	34438	133	142	9	-5.45173	2.56662	RAD21
chr6	159214399	159214906	chr6	159392773	159394019	177867	191	431	13	-6.18848	2.43644	RAD21
chr11	19579269	19579592	chr11	19924881	19925537	345289	121	190	9	-5.64837	3.39461	RAD21
chr10	5991305	5991688	chr10	6019796	6020206	28108	74	88	7	-4.88958	3.09453	RAD21
chr10	5991305	5991688	chr10	6019509	6019695	27821	74	84	6	-5.15136	2.83536	RAD21
chr1	87791573	87792105	chr1	87915080	87915562	122975	145	60	4	-6.29849	2.0887	RAD21
chr1	170658628	170658985	chr1	170898801	170899282	239816	61	113	7	-4.94644	3.88899	RAD21
chr17	38170020	38170326	chr17	38347649	38348325	177323	192	115	8	-5.84354	2.79033	RAD21
chr1	5574638	5574985	chr1	5805849	5806287	230864	36	99	5	-4.95976	3.85372	RAD21
chr16	71842124	71843228	chr16	71880412	71880749	37184	176	111	9	-5.48557	2.54391	RAD21
chr16	71842124	71843228	chr16	71879535	71880004	36307	176	89	7	-5.7673	2.25915	RAD21
chr16	67580788	67581586	chr16	67702498	67702645	120912	180	159	11	-5.46607	2.93105	RAD21
chr16	67580788	67581586	chr16	67678542	67679193	96956	180	183	12	-5.43263	2.85133	RAD21
chr16	67580788	67581586	chr16	67701763	67702126	120177	180	134	12	-5.12098	3.28063	RAD21
chr1	206781457	206781860	chr1	206804473	206804736	22613	159	75	6	-5.80287	2.1758	RAD21
chr1	206781457	206781860	chr1	206837326	206837970	55466	159	223	11	-5.68029	2.41976	RAD21
chr11	72542572	72542969	chr11	72888850	72889669	345881	79	361	9	-5.86388	3.18015	RAD21
chr1	204131475	204132056	chr1	204176185	204176579	44129	142	41	7	-4.77758	3.28624	RAD21
chr1	52593552	52593872	chr1	52761916	52762413	168044	146	139	15	-4.50198	4.14178	RAD21
chr11	124285063	124285780	chr11	124456216	124456491	170436	108	52	13	-3.50348	5.18147	RAD21
chr14	68085387	68085904	chr14	68133646	68134262	47742	118	182	10	-5.36952	2.70429	RAD21
chr11	5645813	5646299	chr11	5710871	5711222	64572	63	52	3	-5.89715	2.23351	RAD21
chr6	97634221	97634743	chr6	97841922	97842420	207179	133	163	16	-4.43892	4.32459	RAD21
chr15	67239696	67240091	chr15	67725767	67726248	485676	471	80	8	-6.378	2.77721	RAD21
chr8	26149265	26149605	chr8	26184685	26185501	35080	64	264	7	-5.84301	2.17931	RAD21
chr6	170231704	170232266	chr6	170601077	170601364	368811	140	90	5	-6.22258	2.85129	RAD21
chr10	96892666	96893156	chr10	97122811	97123629	229655	138	446	15	-5.61147	3.18619	RAD21
chr11	554804	555390	chr11	723203	723649	167813	103	177	6	-6.22736	2.35955	RAD21
chr11	554804	555390	chr11	728010	728447	172620	103	97	4	-6.43685	2.16141	RAD21
chr4	56275499	56276126	chr4	56420423	56421107	144297	90	133	6	-5.80664	2.69408	RAD21
chr4	56275499	56276126	chr4	56502284	56502535	226158	90	41	3	-6.01616	2.76401	RAD21
chr1	209929334	209929629	chr1	209958231	209958415	28602	47	50	6	-4.17865	3.79793	RAD21
chr11	64794565	64795761	chr11	64851556	64851871	55795	70	45	4	-5.28257	2.82627	RAD21
chr16	27983729	27984393	chr16	28081707	28082486	97314	75	176	13	-4.35807	3.94995	RAD21
chr17	40374236	40374561	chr17	40440409	40440749	65848	74	69	4	-5.76558	2.37293	RAD21
chr8	18054774	18055345	chr8	18422344	18422877	366999	69	140	3	-6.97852	2.09896	RAD21
chr10	105742479	105742810	chr10	105881452	105881675	138642	59	87	4	-5.77086	2.70337	RAD21
chr8	37978110	37978520	chr8	38268087	38268796	289567	93	320	7	-6.4091	2.52905	RAD21
chr8	37978110	37978520	chr8	38269051	38269464	290531	93	334	6	-6.76022	2.17642	RAD21
chr14	29223413	29223857	chr14	29691906	29692231	468049	137	56	6	-5.36181	3.75046	RAD21
chr2	175975762	175976301	chr2	176052164	176052501	75863	130	68	8	-4.92816	3.27078	RAD21
chr11	95745007	95745940	chr11	95787985	95788451	42045	135	101	6	-5.93688	2.10965	RAD21
chr3	114936356	114936982	chr3	115411448	115412303	474466	118	381	21	-4.62444	4.46216	RAD21
chr3	114936356	114936982	chr3	115410982	115411314	474000	118	319	21	-4.44683	4.63331	RAD21
chr4	174341484	174341835	chr4	174415476	174415947	73641	88	102	10	-4.49714	3.70268	RAD21
chr13	46085717	46086171	chr13	46302899	46303252	216728	93	121	4	-6.5558	2.18508	RAD21
chr4	6333846	6334133	chr4	6548270	6548678	214137	139	80	5	-6.09762	2.64563	RAD21
chr11	269264	269789	chr11	305016	305276	35227	64	100	4	-5.99146	2.03186	RAD21
chr11	269264	269789	chr11	303605	303769	33816	64	75	4	-5.70378	2.31346	RAD21
chr5	145061155	145061506	chr5	145205056	145205601	143550	68	80	5	-5.38266	3.12709	RAD21
chr5	145061155	145061506	chr5	145428959	145429386	367453	68	76	3	-6.35302	2.72031	RAD21
chr5	140800290	140800869	chr5	140904107	140904854	103238	187	240	10	-6.10658	2.19264	RAD21
chr3	45552915	45553318	chr3	45699199	45699536	145881	187	259	16	-5.24276	3.28267	RAD21
chr3	45552915	45553318	chr3	45698312	45698805	144994	187	230	15	-5.25309	3.26769	RAD21
chr14	100523172	100523892	chr14	100574471	100575082	50579	161	168	16	-4.66019	3.43597	RAD21
chr4	7805758	7806097	chr4	7846062	7846292	39965	185	41	6	-5.35041	2.69081	RAD21
chr11	9286016	9286268	chr11	9335338	9335496	49070	95	55	5	-5.34233	2.73736	RAD21
chr11	43525092	43525275	chr11	43873531	43874119	348256	63	158	5	-5.98685	3.06045	RAD21
chr21	28222387	28222874	chr21	29073343	29073628	850469	120	34	4	-5.54126	3.59605	RAD21
chr21	28222387	28222874	chr21	30312369	30312917	2089495	120	57	3	-6.63332	2.57481	RAD21
chr10	112116372	112117034	chr10	112259220	112259534	142186	204	183	9	-6.13316	2.34783	RAD21
chr10	112116372	112117034	chr10	112263971	112264140	146937	204	129	8	-6.01905	2.48756	RAD21
chr20	49126828	49127209	chr20	49186822	49187526	59613	84	138	9	-4.96362	3.16799	RAD21
chr20	49126828	49127209	chr20	49192495	49192801	65286	84	127	6	-5.69148	2.44654	RAD21
chr10	79474908	79475196	chr10	79516208	79516625	41012	60	64	4	-5.48064	2.56442	RAD21
chr8	94834352	94835185	chr8	94972468	94972707	137283	273	241	38	-3.8191	4.70194	RAD21
chr8	94834352	94835185	chr8	94973011	94973613	137826	273	292	38	-4.01105	4.50771	RAD21
chr8	94834352	94835185	chr8	94987135	94987858	151950	273	241	17	-5.42784	3.11931	RAD21
chr8	94834352	94835185	chr8	94987941	94988120	152756	273	275	17	-5.55982	2.98663	RAD21
chr7	93532002	93532708	chr7	94024538	94025324	491830	161	255	8	-6.46378	2.69775	RAD21
chr12	113877244	113877752	chr12	114350468	114350941	472716	80	81	3	-6.57925	2.57767	RAD21
chr1	31274508	31275137	chr1	31402227	31402675	127090	187	98	9	-5.42163	3.00647	RAD21
chr12	52419229	52420182	chr12	52477075	52477591	56893	380	178	32	-4.19048	3.94437	RAD21
chr5	6632664	6632849	chr5	6745520	6746409	112671	82	242	6	-6.31214	2.02708	RAD21
chr1	35496390	35497395	chr1	35544811	35545392	47416	85	39	3	-5.90899	2.15696	RAD21
chr6	107996177	107997016	chr6	108169907	108170059	172891	354	163	9	-6.5686	2.02643	RAD21
chr6	107996177	107997016	chr6	108169319	108169885	172303	354	136	9	-6.3875	2.21118	RAD21
chr1	33760998	33761556	chr1	33937805	33938024	176249	162	151	10	-5.49971	3.14133	RAD21
chr2	10213177	10213317	chr2	10574925	10575527	361608	209	279	8	-6.81466	2.25416	RAD21
chr2	10213177	10213317	chr2	10237461	10237976	24144	209	158	29	-3.67034	4.26308	RAD21
chr11	84095625	84096133	chr11	84235530	84235855	139397	66	49	3	-5.88425	2.59048	RAD21
chr1	158216293	158216766	chr1	158299521	158300070	82755	93	171	23	-3.40327	4.85745	RAD21
chr8	58909381	58910459	chr8	59157027	59157185	246568	373	39	6	-6.00162	2.83322	RAD21
chr10	26727521	26727808	chr10	26757802	26757954	29994	130	25	4	-5.31382	2.68508	RAD21
chrX	70829009	70829299	chrX	70870381	70870763	41082	40	142	6	-5.06119	2.98618	RAD21
chr4	100298582	100298781	chr4	100325808	100325969	27027	28	228	5	-5.54267	2.44703	RAD21
chr14	34318332	34318789	chr14	34567736	34568642	248947	57	223	11	-4.65443	4.2087	RAD21
chr11	6400025	6400809	chr11	6526855	6527299	126046	309	72	10	-5.40484	3.01863	RAD21
chr11	6400025	6400809	chr11	6464484	6465110	63675	309	176	40	-3.52607	4.65406	RAD21
chr11	6400025	6400809	chr11	6460326	6460491	59517	309	57	8	-5.61751	2.49987	RAD21
chr2	61032596	61033028	chr2	61066439	61066859	33411	113	110	6	-5.84435	2.17229	RAD21
chr5	157095884	157096243	chr5	157170136	157170963	73893	164	332	15	-5.4889	2.6886	RAD21
chr19	18389874	18390709	chr19	18414356	18414617	23647	302	72	10	-5.38192	2.58991	RAD21
chr19	18389874	18390709	chr19	18416194	18416348	25485	302	76	14	-4.76305	3.20422	RAD21
chr22	50964054	50964357	chr22	51058877	51059762	94520	123	183	8	-5.86279	2.4003	RAD21
chr22	50964054	50964357	chr22	51058459	51058639	94102	123	137	8	-5.57328	2.69382	RAD21
chr22	50964054	50964357	chr22	51021765	51021919	57408	123	43	4	-5.8008	2.30454	RAD21
chr7	65540648	65541227	chr7	65613977	65614117	72750	52	35	3	-5.30937	2.86753	RAD21
chr7	65540648	65541227	chr7	65613377	65613805	72150	52	28	3	-5.08622	3.0934	RAD21
chr5	31929358	31929653	chr5	32076669	32077323	147016	48	164	5	-5.75219	2.76301	RAD21
chr19	46581817	46582116	chr19	46692678	46693054	110562	147	126	9	-5.43227	2.91625	RAD21
chr19	4809662	4810040	chr19	4911403	4912351	101363	152	224	15	-5.01943	3.29387	RAD21
chr3	63335353	63335669	chr3	64009124	64009496	673455	84	52	3	-6.18484	3.00925	RAD21
chr10	13451542	13451875	chr10	13482426	13482851	30551	35	93	3	-5.89072	2.11676	RAD21
chr2	28816979	28817786	chr2	28976030	28976527	158244	175	125	12	-5.02329	3.5637	RAD21
chr20	1945850	1946040	chr20	2152994	2153558	206954	127	206	8	-6.01318	2.71093	RAD21
chr1	244817116	244817278	chr1	244960137	244960721	142859	91	123	5	-6.10417	2.38086	RAD21
chr1	244817116	244817278	chr1	244892839	244893045	75561	91	32	3	-5.77937	2.39843	RAD21
chr1	214982269	214982564	chr1	215249731	215250107	267167	29	33	3	-4.66658	4.24137	RAD21
chr9	115249844	115250068	chr9	115427400	115428079	177332	117	140	6	-6.1203	2.5049	RAD21
chr13	80253345	80253868	chr13	80938016	80938480	684148	96	71	3	-6.6298	2.59636	RAD21
chr4	42373358	42374208	chr4	42521528	42522301	147320	170	205	18	-4.67806	3.87172	RAD21
chr17	62294142	62294399	chr17	62359225	62359783	64826	49	188	5	-5.90939	2.22198	RAD21
chr6	88639387	88640048	chr6	89579864	89580057	939816	248	205	8	-6.67756	2.56265	RAD21
chr13	95327133	95327656	chr13	96055510	96055878	727854	79	417	5	-7.18366	2.0883	RAD21
chr14	102512819	102513039	chr14	102562698	102563299	49659	23	204	4	-5.68103	2.39634	RAD21
chr3	179040523	179040802	chr3	179276448	179277044	235646	165	247	8	-6.45645	2.34099	RAD21
chr9	87312400	87312812	chr9	87396152	87396905	83340	172	225	20	-4.57213	3.66582	RAD21
chr2	240261525	240261671	chr2	240323649	240323819	61978	26	68	3	-5.28038	2.85399	RAD21
chr18	12744123	12744696	chr18	12934487	12934923	189791	138	258	18	-4.69947	4.00883	RAD21
chr18	12744123	12744696	chr18	12893813	12894118	149117	138	181	14	-4.84764	3.70536	RAD21
chr17	31110554	31111204	chr17	31204077	31204822	92873	315	311	33	-4.49935	3.78438	RAD21
chr1	226388734	226389185	chr1	226520989	226521536	131804	75	143	8	-5.12145	3.33695	RAD21
chr12	18292916	18293385	chr12	18377714	18378063	84329	110	31	3	-5.93724	2.27568	RAD21
chr12	18292916	18293385	chr12	19339631	19340074	1046246	110	78	6	-5.47367	3.6418	RAD21
chr12	18292916	18293385	chr12	19441496	19441951	1148111	110	52	3	-6.4545	2.75703	RAD21
chr20	36701476	36702314	chr20	36793483	36794042	91169	161	188	16	-4.77267	3.49706	RAD21
chr18	74633995	74634450	chr18	74693500	74693774	59050	152	86	11	-4.68244	3.45266	RAD21
chr13	113345142	113345425	chr13	113528632	113529233	183207	73	216	9	-5.27129	3.39965	RAD21
chr13	113345142	113345425	chr13	113528258	113528486	182833	73	176	9	-5.06649	3.60947	RAD21
chr13	113345142	113345425	chr13	113456802	113456995	111377	73	57	3	-6.13629	2.20072	RAD21
chr13	113345142	113345425	chr13	113457349	113457530	111924	73	62	3	-6.22037	2.11736	RAD21
chr20	3696892	3697376	chr20	3730451	3730663	33075	112	46	5	-5.32826	2.68385	RAD21
chr2	120510852	120511414	chr2	120932310	120933049	420896	126	246	11	-5.54582	3.55655	RAD21
chr2	120510852	120511414	chr2	120934511	120935213	423097	126	230	8	-6.11548	3.00186	RAD21
chr1	60442523	60442905	chr1	61230845	61231241	787940	64	62	4	-5.51343	3.62642	RAD21
chr1	64081526	64081983	chr1	64602493	64603212	520510	107	124	7	-5.60129	3.53529	RAD21
chr1	64081526	64081983	chr1	64383599	64383872	301616	107	42	3	-6.21327	2.755	RAD21
chr1	64081526	64081983	chr1	64380854	64381085	298871	107	43	3	-6.2368	2.72504	RAD21
chr1	156696409	156696767	chr1	156736565	156736708	39798	268	61	11	-4.90607	3.13582	RAD21
chr7	105400226	105400371	chr7	105526896	105527084	126525	219	30	5	-5.57139	2.85027	RAD21
chr15	51575355	51575499	chr15	51673115	51673858	97616	83	318	11	-5.3851	2.90302	RAD21
chr15	51575355	51575499	chr15	51694038	51694472	118539	83	117	6	-5.5975	2.7852	RAD21
chr14	65753779	65754911	chr14	65879006	65879389	124095	248	233	10	-6.3593	2.03162	RAD21
chr14	65753779	65754911	chr14	65787748	65788159	32837	248	68	7	-5.84112	2.17357	RAD21
chr1	27435732	27435909	chr1	27610919	27611519	175010	27	207	3	-6.43133	2.17581	RAD21
chr1	161195743	161195976	chr1	161351779	161352281	155803	228	90	9	-5.53471	3.02554	RAD21
chr3	182902383	182902705	chr3	183103639	183104195	200934	124	256	11	-5.56967	3.14829	RAD21
chr18	21202099	21202529	chr18	21282954	21283443	80425	111	107	10	-4.77719	3.44404	RAD21
chr10	76003805	76004428	chr10	76857799	76857994	853371	85	94	5	-5.76707	3.39015	RAD21
chr10	76003805	76004428	chr10	76859221	76860203	854793	85	325	8	-6.06759	3.11634	RAD21
chr2	89039488	89040166	chr2	90246329	90246691	1206163	194	52	4	-6.44651	2.76083	RAD21
chr10	102099025	102099181	chr10	102192980	102193997	93799	237	430	73	-2.95093	5.36984	RAD21
chr1	169570260	169571082	chr1	169663348	169663728	92266	232	98	13	-4.90181	3.37048	RAD21
chr19	11646790	11647278	chr19	11698338	11698975	51060	52	240	6	-5.84836	2.23187	RAD21
chr22	23035098	23035245	chr22	23284781	23285360	249536	74	220	5	-6.47882	2.35636	RAD21
chr15	44955744	44956468	chr15	45002848	45003099	46380	241	119	13	-5.13402	2.93672	RAD21
chr15	44955744	44956468	chr15	45003396	45003551	46928	241	124	12	-5.33527	2.73556	RAD21
chr15	44955744	44956468	chr15	45002484	45002734	46016	241	97	13	-4.92961	3.14171	RAD21
chr15	44955744	44956468	chr15	45003577	45003750	47109	241	132	12	-5.39779	2.67306	RAD21
chr3	47879246	47879927	chr3	48031187	48031797	151260	80	206	12	-4.74009	3.82577	RAD21
chr7	12678301	12679055	chr7	12726271	12726536	47216	110	75	5	-5.79909	2.26743	RAD21
chr15	38766273	38766892	chr15	38982762	38983727	215870	160	152	7	-6.20723	2.53876	RAD21
chr15	38766273	38766892	chr15	38991731	38992281	224839	160	130	9	-5.54826	3.23793	RAD21
chr1	84907683	84908368	chr1	85219122	85219709	310754	190	161	7	-6.43661	2.54925	RAD21
chrX	137274158	137274528	chrX	137827262	137827824	552734	76	124	3	-6.95379	2.25827	RAD21
chr9	110246372	110246848	chr9	111034619	111035144	787771	115	106	8	-5.24949	3.86857	RAD21
chr13	53436519	53436820	chr13	53542147	53542592	105327	32	119	4	-5.47227	2.85025	RAD21
chr10	101390240	101390657	chr10	101458304	101458531	67647	66	26	3	-5.25053	2.90666	RAD21
chr6	119469454	119470251	chr6	119670796	119671127	200545	263	218	10	-6.35148	2.34452	RAD21
chr6	119469454	119470251	chr6	119671472	119671884	201221	263	238	9	-6.64998	2.04025	RAD21
chr19	6047988	6048322	chr19	6125433	6126073	77111	251	319	40	-3.91289	4.3146	RAD21
chr19	6047988	6048322	chr19	6126346	6126786	78024	251	370	40	-4.0612	4.16644	RAD21
chr8	25027483	25028014	chr8	25910762	25911072	882748	165	61	3	-7.01959	2.2509	RAD21
chr1	161536009	161536433	chr1	161708543	161709072	172110	50	216	5	-6.06843	2.53981	RAD21
chr1	240190317	240190647	chr1	240352753	240353014	162106	42	38	5	-4.15638	4.47484	RAD21
chr1	240190317	240190647	chr1	240354150	240354409	163503	42	44	5	-4.30298	4.32925	RAD21
chr2	223180221	223180372	chr2	223426407	223427041	246035	76	221	7	-5.83708	2.99906	RAD21
chr7	28521098	28521450	chr7	28549358	28549547	27908	76	78	4	-5.91485	2.08422	RAD21
chr5	112027064	112027240	chr5	112092854	112093233	65614	128	189	9	-5.69933	2.43978	RAD21
chr5	112027064	112027240	chr5	112093324	112093851	66084	128	222	10	-5.64954	2.49251	RAD21
chr1	63782673	63783000	chr1	63907226	63907606	124226	40	108	6	-4.78749	3.64209	RAD21
chr13	31247926	31248129	chr13	31376917	31377546	128788	90	271	7	-6.21011	2.20624	RAD21
chr1	200108769	200109283	chr1	200227648	200227909	118365	140	52	4	-6.1203	2.24958	RAD21
chr1	200108769	200109283	chr1	200245683	200245888	136400	140	44	4	-5.95324	2.50512	RAD21
chr1	25317820	25318018	chr1	25427541	25428384	109523	38	283	5	-6.06416	2.26565	RAD21
chr1	25317820	25318018	chr1	25427316	25427494	109298	38	226	5	-5.83925	2.49437	RAD21
chr4	177298828	177299347	chr4	177968491	177968835	669144	211	76	9	-5.28814	3.84423	RAD21
chr11	130934217	130934815	chr11	131543759	131544294	608944	161	168	7	-6.31355	2.87903	RAD21
chr17	1179326	1179790	chr17	1235737	1236146	55947	113	153	9	-5.36338	2.74457	RAD21
chr10	98402638	98403413	chr10	98590007	98590838	186594	285	268	15	-5.82738	2.83785	RAD21
chr1	37920370	37920878	chr1	37952811	37953437	31933	213	138	26	-3.77235	4.22199	RAD21
chr13	34319906	34320075	chr13	34392027	34392941	71952	75	78	4	-5.90161	2.25801	RAD21
chr16	30996834	30997021	chr16	31083888	31084113	86867	187	64	5	-6.17112	2.04812	RAD21
chr17	31268121	31268347	chr17	31325194	31325758	56847	64	113	7	-4.99445	3.12446	RAD21
chr12	56586684	56587473	chr12	56617765	56618626	30292	178	174	12	-5.37103	2.62981	RAD21
chr15	84107368	84107876	chr15	84228047	84228571	120171	148	129	16	-4.31185	4.10859	RAD21
chr1	120428780	120429225	chr1	120688446	120688698	259221	54	79	3	-6.16121	2.70501	RAD21
chr5	162900664	162901020	chr5	162930198	162930430	29178	75	78	7	-4.78238	3.20595	RAD21
chr14	70070910	70071199	chr14	70175606	70175860	104407	428	67	9	-5.86937	2.44035	RAD21
chr1	154745155	154745407	chr1	154850875	154851519	105468	39	324	7	-5.55248	2.769	RAD21
chr4	91041151	91041584	chr4	91214186	91215067	172602	91	95	4	-6.29215	2.3107	RAD21
chr7	142551595	142552236	chr7	142700517	142700868	148281	116	165	9	-5.46509	3.06482	RAD21
chr7	142551595	142552236	chr7	142699261	142699506	147025	116	134	9	-5.25698	3.27352	RAD21
chr9	38371476	38371911	chr9	38400568	38401008	28657	104	153	7	-5.78301	2.21666	RAD21
chr3	56381254	56381531	chr3	56481066	56481597	99535	31	74	3	-5.54083	2.7531	RAD21
chr1	160807322	160807587	chr1	160921131	160921681	113544	73	171	6	-5.8486	2.50496	RAD21
chr10	6177024	6177177	chr10	6443285	6444074	266108	30	237	3	-6.67203	2.20471	RAD21
chr16	12667234	12668119	chr16	12912540	12912810	244421	134	113	9	-5.23078	3.61125	RAD21
chr16	12667234	12668119	chr16	12913171	12913549	245052	134	143	9	-5.46624	3.37347	RAD21
chr1	103571801	103572304	chr1	104003686	104004209	431382	66	78	7	-4.65454	4.43021	RAD21
chr1	103571801	103572304	chr1	104057379	104057978	485075	66	116	8	-4.78436	4.30893	RAD21
chr14	78082465	78082612	chr14	78108387	78108800	25775	90	26	3	-5.56068	2.42428	RAD21
chr16	10408585	10409130	chr16	10603395	10603866	194265	96	299	16	-4.71961	4.00203	RAD21
chr1	120154167	120154604	chr1	120204845	120205242	50241	175	178	15	-4.93047	3.16013	RAD21
chr1	120154167	120154604	chr1	120218015	120218627	63411	175	227	21	-4.50069	3.65664	RAD21
chr1	120154167	120154604	chr1	120205568	120206104	50964	175	222	16	-5.02229	3.07018	RAD21
chr2	24149805	24150391	chr2	24306731	24307983	156340	167	168	8	-6.08307	2.46193	RAD21
chrX	117981567	117982078	chrX	118142109	118142414	160031	115	74	7	-5.15718	3.43304	RAD21
chr12	10305841	10306426	chr12	10343104	10343788	36678	95	155	14	-4.31919	3.7068	RAD21
chr8	24102413	24102957	chr8	24245099	24245488	142142	111	75	8	-4.86814	3.6496	RAD21
chr15	63450115	63450256	chr15	63484187	63484426	33931	71	85	4	-5.93274	2.08612	RAD21
chr15	63450115	63450256	chr15	63569319	63569501	119063	71	56	3	-6.09081	2.28301	RAD21
chr15	86397557	86398097	chr15	88787220	88787427	2389123	167	43	3	-6.68197	2.53192	RAD21
chr15	86397557	86398097	chr15	88787777	88788052	2389680	167	54	3	-6.90975	2.33295	RAD21
chr15	86397557	86398097	chr15	88790051	88790370	2391954	167	61	4	-6.45628	2.72906	RAD21
chr22	39052919	39053609	chr22	39077606	39078255	23997	80	66	5	-5.35281	2.61991	RAD21
chr3	131268026	131268665	chr3	131514221	131514387	245556	166	172	7	-6.36766	2.45833	RAD21
chr3	131268026	131268665	chr3	131377024	131377275	108359	166	52	6	-5.47971	2.85718	RAD21
chr19	35535208	35535692	chr19	35581163	35581803	45471	102	137	6	-5.96143	2.09697	RAD21
chr16	2390638	2391223	chr16	2551074	2551636	159851	127	173	6	-6.41396	2.13502	RAD21
chr10	88472055	88472337	chr10	88639306	88639450	166969	227	46	7	-5.36177	3.24995	RAD21
chr10	88472055	88472337	chr10	88638800	88638990	166463	227	40	7	-5.22201	3.39227	RAD21
chr1	152843721	152844255	chr1	152898363	152899026	54108	244	286	56	-3.10246	5.03775	RAD21
chr1	152843721	152844255	chr1	152896768	152896951	52513	244	68	16	-4.1715	3.94181	RAD21
chr2	176991696	176992314	chr2	177516990	177517413	524676	178	115	7	-6.0349	3.12273	RAD21
chr2	176991696	176992314	chr2	177518687	177518899	526373	178	103	6	-6.23299	2.93436	RAD21
chr17	3747267	3747595	chr17	3907734	3908408	160139	66	198	5	-6.25905	2.29611	RAD21
chr5	125759212	125759399	chr5	125797764	125797924	38365	66	43	3	-5.75363	2.28031	RAD21
chr17	78839868	78840471	chr17	78944157	78944620	103686	127	104	6	-5.90506	2.40051	RAD21
chr17	56288405	56288571	chr17	56326946	56327570	38375	13	103	3	-5.00245	3.0324	RAD21
chr15	63766811	63766976	chr15	63796429	63796889	29453	93	155	8	-5.41714	2.5807	RAD21
chr2	45208491	45209316	chr2	45721469	45722495	512153	286	224	31	-4.19966	4.87308	RAD21
chr2	45208491	45209316	chr2	45805639	45805945	596323	286	42	3	-7.19644	2.04445	RAD21
chr7	149535870	149536163	chr7	149569950	149570169	33787	50	50	3	-5.62682	2.38989	RAD21
chr3	182431906	182432424	chr3	182555611	182556021	123187	210	69	9	-5.18676	3.22805	RAD21
chr12	9786612	9787421	chr12	9860579	9861168	73158	204	145	14	-5.01674	3.16879	RAD21
chr1	100929319	100929672	chr1	101331937	101332284	402265	134	100	7	-5.61119	3.48156	RAD21
chr1	100929319	100929672	chr1	101333728	101334442	404056	134	213	11	-5.46334	3.62766	RAD21
chr11	123940015	123940348	chr11	124065617	124066377	125269	76	155	9	-4.97971	3.45038	RAD21
chr13	53318207	53318393	chr13	53383018	53383885	64625	19	178	3	-5.929	2.20116	RAD21
chr8	8141186	8141380	chr8	8182114	8182906	40734	66	96	4	-5.98141	2.06033	RAD21
chr11	107669906	107670299	chr11	107729206	107729392	58907	72	51	4	-5.4359	2.68286	RAD21
chr1	185782531	185782871	chr1	186181645	186182231	398774	46	166	8	-4.78175	4.2946	RAD21
chr20	52195115	52196034	chr20	52486173	52486994	290139	272	295	9	-6.89833	2.03585	RAD21
chr20	52195115	52196034	chr20	52556241	52556853	360207	272	353	10	-6.8671	2.20002	RAD21
chr13	43543687	43544358	chr13	43706349	43706853	161991	159	95	11	-4.82699	3.78206	RAD21
chr11	121526188	121527289	chr11	122376298	122377037	849009	317	165	10	-6.25968	2.94134	RAD21
chr15	59273374	59273516	chr15	59397245	59398065	123729	189	88	6	-6.13556	2.25905	RAD21
chr4	47492615	47492928	chr4	47566305	47566732	73377	76	80	4	-5.94017	2.2245	RAD21
chr11	116603472	116603806	chr11	116976696	116977075	372890	59	281	5	-6.49702	2.58383	RAD21
chr17	72364374	72364949	chr17	72453469	72454270	88520	104	335	15	-5.04242	3.20886	RAD21
chr17	72364374	72364949	chr17	72597844	72598559	232895	104	142	8	-5.44133	3.36793	RAD21
chr20	45901342	45901986	chr20	46250734	46250895	348748	143	172	5	-6.89146	2.15862	RAD21
chr20	45901342	45901986	chr20	46249460	46250346	347474	143	149	5	-6.74792	2.29991	RAD21
chr16	73049971	73050768	chr16	73081895	73082327	31127	46	114	4	-5.79225	2.21618	RAD21
chr5	139624120	139624473	chr5	139731234	139731751	106761	152	148	11	-5.2253	3.10937	RAD21
chr5	139624120	139624473	chr5	139737054	139737618	112581	152	145	10	-5.39544	2.96356	RAD21
chr2	150186290	150186467	chr2	150417721	150418311	231254	29	203	4	-5.90791	2.88815	RAD21
chr8	81599477	81599859	chr8	81903908	81904624	304049	95	237	6	-6.43842	2.53317	RAD21
chr12	122134950	122135398	chr12	122211592	122211755	76194	142	243	31	-3.58091	4.6507	RAD21
chr13	27998427	27998655	chr13	28024601	28025082	25946	60	92	5	-5.39726	2.58518	RAD21
chr13	27998427	27998655	chr13	28024183	28024383	25528	60	74	5	-5.17953	2.79657	RAD21
chr15	52455824	52456030	chr15	52500259	52501134	44229	21	183	5	-5.03513	3.02694	RAD21
chr1	180334245	180334616	chr1	180385558	180385709	50942	42	133	4	-5.85543	2.22425	RAD21
chr1	180334245	180334616	chr1	180384961	180385492	50345	42	117	4	-5.72725	2.35208	RAD21
chr1	180334245	180334616	chr1	180447267	180447615	112651	42	77	3	-5.88425	2.46431	RAD21
chr2	37641585	37642217	chr2	38104444	38105058	462227	343	215	8	-7.04949	2.1184	RAD21
chr2	37641585	37642217	chr2	38036511	38037003	394294	343	59	8	-5.75638	3.33395	RAD21
chr2	37641585	37642217	chr2	38059542	38060464	417325	343	339	41	-4.23659	4.83406	RAD21
chr1	20427353	20427824	chr1	20521617	20522062	93793	138	108	10	-5.00421	3.27333	RAD21
chr4	187070890	187071433	chr4	187123021	187123412	51588	77	78	6	-5.117	2.97674	RAD21
chr15	58369749	58370045	chr15	58474560	58475183	104515	25	154	4	-5.48324	2.83518	RAD21
chr8	146104389	146104621	chr8	146127354	146127644	22733	65	86	4	-5.85615	2.1244	RAD21
chr3	50231955	50232332	chr3	50263466	50263981	31134	167	352	13	-5.85173	2.15731	RAD21
chr3	50231955	50232332	chr3	50283408	50284037	51076	167	72	6	-5.81114	2.26972	RAD21
chr2	46290076	46290670	chr2	46521266	46521621	230596	158	37	6	-5.08999	3.72029	RAD21
chr2	68348269	68348475	chr2	68509874	68510316	161399	238	168	13	-5.46634	3.1196	RAD21
chr5	95116345	95117264	chr5	95182534	95183142	65270	477	430	68	-3.79229	4.38838	RAD21
chr5	95116345	95117264	chr5	95178610	95179292	61346	477	267	51	-3.89111	4.27105	RAD21
chr1	233613194	233613458	chr1	233926654	233927462	313196	32	248	3	-6.78194	2.20625	RAD21
chr10	93847395	93847933	chr10	94050670	94051120	202737	406	198	34	-4.2419	4.51576	RAD21
chr10	93847395	93847933	chr10	94051432	94052322	203499	406	232	34	-4.40037	4.35507	RAD21
chr22	22326631	22327065	chr22	23296817	23297207	969752	80	531	6	-7.07327	2.20577	RAD21
chr12	57607854	57608430	chr12	57637063	57637797	28633	318	247	55	-3.25677	4.70691	RAD21
chr20	2894796	2895092	chr20	2981391	2981988	86299	62	122	5	-5.71228	2.51424	RAD21
chr10	112174266	112174854	chr10	112263971	112264140	89117	137	129	6	-6.19627	2.03307	RAD21
chr16	81843999	81844144	chr16	81876128	81876301	31984	100	76	5	-5.71703	2.29376	RAD21
chr16	81843999	81844144	chr16	81876523	81876713	32379	100	82	5	-5.79301	2.21976	RAD21
chr16	81843999	81844144	chr16	81875406	81875811	31262	100	67	6	-5.22634	2.77721	RAD21
chr21	36261594	36261745	chr21	36415875	36416074	154130	302	74	7	-6.12267	2.41177	RAD21
chr15	71740754	71740908	chr15	72022663	72023454	281755	191	120	16	-4.49459	4.44775	RAD21
chr3	184592711	184593353	chr3	184894385	184895021	301032	169	172	21	-4.18835	4.79787	RAD21
chr3	184592711	184593353	chr3	184894108	184894286	300755	169	145	20	-4.11517	4.87121	RAD21
chr3	184592711	184593353	chr3	184893680	184894068	300327	169	136	20	-4.05109	4.93507	RAD21
chr8	102658487	102659097	chr8	103209193	103210095	550096	138	415	7	-7.06371	2.15287	RAD21
chr1	52870427	52870939	chr1	53151839	53152200	280900	116	120	4	-6.76849	2.14428	RAD21
chr11	1714496	1714869	chr11	1853673	1854081	138804	219	128	27	-3.64943	4.88486	RAD21
chr16	29712706	29713062	chr16	30032567	30033223	319505	336	116	9	-6.17625	2.82783	RAD21
chr1	52184914	52185108	chr1	52234302	52235223	49194	29	127	4	-5.43889	2.63999	RAD21
chr17	55969768	55970394	chr17	56072785	56073151	102391	154	239	19	-4.62454	3.70191	RAD21
chr17	55969768	55970394	chr17	56071649	56071791	101255	154	204	18	-4.57433	3.74779	RAD21
chr12	6540778	6541068	chr12	6571114	6571356	30046	67	85	5	-5.42847	2.57199	RAD21
chr22	46041265	46042092	chr22	46374375	46375236	332283	265	300	24	-4.9274	4.10052	RAD21
chr5	139619435	139619845	chr5	139737054	139737618	117209	149	145	10	-5.37551	3.00592	RAD21
chr14	23734354	23734852	chr14	23770602	23771009	35750	115	103	7	-5.48784	2.53588	RAD21
chr14	23734354	23734852	chr14	23770118	23770258	35266	115	104	7	-5.4975	2.52432	RAD21
chr14	23734354	23734852	chr14	23848938	23849564	114086	115	149	6	-6.16536	2.1837	RAD21
chr19	16889651	16890210	chr19	17010348	17010898	120138	127	141	11	-4.99716	3.40715	RAD21
chr19	16889651	16890210	chr19	17163336	17163612	273126	127	51	4	-6.00342	2.90028	RAD21
chr11	83004442	83004589	chr11	83527542	83527985	522953	84	135	8	-5.17721	3.94062	RAD21
chr11	83004442	83004589	chr11	83434973	83435394	430384	84	159	7	-5.6079	3.50116	RAD21
chr11	83004442	83004589	chr11	83433654	83433903	429065	84	108	5	-5.89407	3.22162	RAD21
chr4	87857230	87857868	chr4	88014017	88014270	156149	197	233	9	-6.33979	2.19622	RAD21
chr4	87857230	87857868	chr4	88014499	88015183	156631	197	286	10	-6.33403	2.20418	RAD21
chr4	87857230	87857868	chr4	87928026	87928256	70158	197	153	12	-5.34383	2.82137	RAD21
chr13	24084969	24086021	chr13	24141988	24142454	55967	271	115	14	-5.06894	3.04468	RAD21
chr14	103984922	103985367	chr14	104012902	104013528	27535	118	203	25	-3.64614	4.31455	RAD21
chr2	207665149	207665895	chr2	208337807	208338226	671912	213	215	7	-6.84011	2.39895	RAD21
chr2	207665149	207665895	chr2	208339525	208340119	673630	213	335	16	-5.63025	3.52557	RAD21
chr1	17386125	17386725	chr1	17563456	17564066	176731	165	199	15	-4.98315	3.67582	RAD21
chr1	17386125	17386725	chr1	17446664	17446865	59939	165	46	6	-5.35107	2.77365	RAD21
chrX	11551146	11551803	chrX	11742474	11742970	190671	308	126	14	-5.28827	3.40582	RAD21
chr19	921662	922186	chr19	982620	983171	60434	487	446	69	-3.82037	4.33926	RAD21
chr7	7142902	7143343	chr7	7392547	7392838	249204	186	67	4	-6.65785	2.17351	RAD21
chr7	7142902	7143343	chr7	7580822	7581562	437479	186	225	18	-4.8611	4.23051	RAD21
chr13	21871123	21871538	chr13	22053116	22053504	181578	152	155	15	-4.65121	4.03351	RAD21
chr10	106065271	106065728	chr10	106111038	106111188	45310	138	363	30	-4.01926	4.05778	RAD21
chr15	89421992	89422256	chr15	89720628	89721522	298372	30	189	3	-6.44572	2.51292	RAD21
chr22	44143846	44144060	chr22	44222324	44222597	78264	34	46	3	-5.15778	3.0459	RAD21
chr11	6640170	6640461	chr11	6704173	6705116	63712	84	199	8	-5.56524	2.56956	RAD21
chr17	75426072	75426668	chr17	75490767	75491575	64099	186	402	25	-4.78445	3.3693	RAD21
chr2	27184516	27184981	chr2	27502783	27503341	317802	239	200	8	-6.6159	2.38242	RAD21
chr11	70313542	70314033	chr11	70601582	70602035	287549	132	91	9	-4.99921	3.94994	RAD21
chr15	74419618	74420552	chr15	74588234	74588465	167682	383	40	6	-6.0534	2.53865	RAD21
chr15	74419618	74420552	chr15	74595005	74595645	174453	383	188	39	-3.85735	4.82988	RAD21
chr1	218503316	218503878	chr1	218694820	218695216	190942	104	52	3	-6.39841	2.26468	RAD21
chr1	235159280	235159618	chr1	235183281	235183455	23663	64	54	3	-5.95064	2.03541	RAD21
chr2	43397065	43397508	chr2	43451326	43451549	53818	168	169	9	-5.85941	2.23104	RAD21
chr1	40609468	40610309	chr1	40771175	40771540	160866	215	39	5	-5.81532	2.75714	RAD21
chr17	10549765	10550072	chr17	10748367	10748974	198295	108	173	12	-4.86561	3.86375	RAD21
chr19	12170339	12170750	chr19	12251111	12251381	80361	104	221	8	-5.88367	2.31282	RAD21
chr11	122503914	122504258	chr11	122625013	122625788	120755	112	198	14	-4.72865	3.68498	RAD21
chr5	56197301	56197582	chr5	56433955	56434284	236373	332	148	17	-5.13592	3.6877	RAD21
chr5	56197301	56197582	chr5	56433531	56433736	235949	332	124	16	-5.08024	3.74336	RAD21
chr5	56197301	56197582	chr5	56516647	56517411	319065	332	246	17	-5.64404	3.36246	RAD21
chr7	30588301	30588833	chr7	30779990	30780493	191157	81	161	8	-5.31697	3.37785	RAD21
chr12	751741	752003	chr12	860192	861079	108189	106	314	9	-6.01838	2.30608	RAD21
chrX	56790194	56790552	chrX	57004533	57005321	213981	297	217	11	-6.27784	2.46087	RAD21
chr3	58318401	58318789	chr3	58477451	58477903	158662	124	101	6	-5.85188	2.71026	RAD21
chrX	65250696	65251215	chrX	65628208	65628676	376993	100	82	3	-6.81466	2.27405	RAD21
chrX	38613360	38613792	chrX	39009009	39009344	395217	127	111	9	-5.15927	3.92199	RAD21
chr18	56067228	56067674	chr18	56160962	56161479	93288	93	139	8	-5.30819	2.96049	RAD21
chr2	191916732	191917493	chr2	192020185	192020805	102692	180	186	35	-3.30801	5.04761	RAD21
chr19	40853838	40854762	chr19	40950151	40951050	95389	70	179	6	-5.85236	2.41522	RAD21
chr8	8923243	8923802	chr8	9007902	9008815	84100	163	384	20	-5.05293	3.17799	RAD21
chr4	111552927	111553598	chr4	111880497	111880799	326899	141	63	4	-6.31931	2.6966	RAD21
chr4	111552927	111553598	chr4	111880139	111880418	326541	141	55	5	-5.73722	3.28044	RAD21
chr19	49291447	49291818	chr19	49474050	49474680	182232	148	185	7	-6.32575	2.30997	RAD21
chr17	74722822	74723453	chr17	74835878	74836340	112425	95	76	4	-6.11202	2.23045	RAD21
chr8	72740200	72740766	chr8	72887282	72887989	146516	275	252	16	-5.60102	2.91649	RAD21
chr8	72740200	72740766	chr8	72919411	72919836	178645	275	167	12	-5.76495	2.87588	RAD21
chrX	3163049	3163347	chrX	3466757	3466980	303410	43	31	4	-4.4226	4.56604	RAD21
chr5	142984820	142985303	chr5	143139959	143140122	154656	77	74	3	-6.45065	2.07559	RAD21
chr1	2126389	2127210	chr1	2246417	2246940	119207	208	83	7	-5.86456	2.51515	RAD21
chr19	10827900	10828539	chr19	10975037	10975615	146498	230	90	6	-6.35437	2.13994	RAD21
chr6	34131235	34131899	chr6	34157991	34158256	26092	184	40	7	-5.01199	2.96361	RAD21
chr6	34131235	34131899	chr6	34158647	34158794	26748	184	51	7	-5.25494	2.72845	RAD21
chr1	107819542	107819943	chr1	108071799	108072610	251856	54	249	12	-4.53662	4.33572	RAD21
chr13	78711733	78712317	chr13	79552288	79553042	839971	121	147	4	-7.01363	2.25348	RAD21
chr5	150806765	150807199	chr5	150880259	150880760	73060	70	313	7	-6.10288	2.05662	RAD21
chr5	150806765	150807199	chr5	150879706	150879943	72507	70	274	7	-5.9698	2.19052	RAD21
chr11	122499652	122500082	chr11	122625013	122625788	124931	116	198	10	-5.43669	2.98059	RAD21
chr11	122499652	122500082	chr11	122651996	122652574	151914	116	162	12	-4.87137	3.69319	RAD21
chr16	27190765	27191535	chr16	27468249	27468870	276714	213	276	18	-5.20095	3.72168	RAD21
chr5	52775086	52775272	chr5	53524560	53525458	749288	249	161	10	-5.99369	3.18738	RAD21
chr5	52775086	52775272	chr5	53513486	53514145	738214	249	164	14	-5.3392	3.7917	RAD21
chr8	72930809	72931203	chr8	73123044	73123384	191841	110	53	3	-6.47355	2.19045	RAD21
chr10	97453521	97454470	chr10	97501440	97501896	46970	484	50	8	-5.93522	2.1288	RAD21
chr12	50038052	50038948	chr12	50100997	50102092	62049	384	540	95	-3.13446	5.04738	RAD21
chr6	721862	722554	chr6	1381842	1382434	659288	153	151	5	-6.82884	2.40718	RAD21
chr11	64877761	64878142	chr11	64948115	64949217	69973	137	181	9	-5.72403	2.43164	RAD21
chr4	2245414	2245584	chr4	2420443	2421167	174859	54	60	3	-5.8861	2.73785	RAD21
chr8	96317590	96318115	chr8	96398786	96399138	80671	160	36	6	-5.07517	3.14051	RAD21
chr8	96317590	96318115	chr8	96770914	96771295	452799	160	67	3	-7.08264	2.08064	RAD21
chr2	183050791	183051375	chr2	183451238	183451515	399863	137	61	3	-6.83363	2.27928	RAD21
chr2	183050791	183051375	chr2	183513986	183514306	462611	137	125	6	-6.16478	2.97356	RAD21
chr2	183050791	183051375	chr2	183515404	183515784	464029	137	138	6	-6.26372	2.8785	RAD21
chr2	63014459	63014977	chr2	63714172	63714399	699195	156	110	4	-6.97775	2.27519	RAD21
chr2	63014459	63014977	chr2	63715213	63715681	700236	156	131	4	-7.15246	2.11328	RAD21
chr2	63014459	63014977	chr2	63415937	63416505	400960	156	127	6	-6.31052	2.79403	RAD21
chr2	63014459	63014977	chr2	63651942	63652419	636965	156	86	4	-6.73161	2.49333	RAD21
chr1	159768492	159769039	chr1	159976149	159976566	207110	203	326	15	-5.684	3.04868	RAD21
chrX	109399424	109399725	chrX	109656315	109656706	256590	52	204	4	-6.49677	2.35735	RAD21
chr10	76025631	76026091	chr10	76497851	76498239	471760	178	139	7	-6.22444	2.91935	RAD21
chr10	76025631	76026091	chr10	76498711	76499119	472620	178	171	6	-6.73993	2.42273	RAD21
chr3	11696711	11697008	chr3	11845467	11845878	148459	95	86	6	-5.42471	3.10727	RAD21
chr7	17746373	17746848	chr7	18031694	18032217	284846	165	85	4	-6.77601	2.14645	RAD21
chr7	17746373	17746848	chr7	18032308	18032461	285460	165	94	4	-6.87665	2.04616	RAD21
chr3	197632775	197633657	chr3	197669837	197670260	36180	180	53	7	-5.27143	2.75359	RAD21
chr10	65028521	65029286	chr10	65388339	65389980	359053	99	345	6	-6.85515	2.21023	RAD21
chr15	75660829	75661133	chr15	75976074	75976465	314941	132	152	5	-6.68781	2.30454	RAD21
chr11	22191370	22191942	chr11	22325650	22326526	133708	62	118	7	-5.006	3.46455	RAD21
chr5	86376994	86377926	chr5	86417159	86417334	39233	108	86	5	-5.9176	2.11916	RAD21
chr17	40995401	40995862	chr17	41080764	41081707	84902	86	121	5	-6.03126	2.18217	RAD21
chr17	782865	783376	chr17	884267	884837	100891	53	136	6	-5.29943	3.0058	RAD21
chr8	6282469	6283505	chr8	6636916	6637519	353411	355	381	29	-5.08033	3.97011	RAD21
chr1	25020854	25021136	chr1	25054031	25054431	32895	29	26	3	-4.42817	3.57703	RAD21
chr17	48246349	48247291	chr17	48275666	48275917	28375	279	157	27	-4.09578	3.87806	RAD21
chr6	143832370	143832532	chr6	143888102	143888487	55570	68	49	3	-5.9141	2.18199	RAD21
chr14	50320585	50320884	chr14	50571268	50572051	250384	139	294	16	-5.07288	3.78718	RAD21
chr12	133657353	133657850	chr12	133757411	133758244	99561	68	78	4	-5.80363	2.48495	RAD21
chr11	36724092	36724880	chr11	36768506	36769071	43626	299	270	61	-3.07712	4.99779	RAD21
chr11	36724092	36724880	chr11	36766198	36766412	41318	299	88	11	-5.38199	2.66483	RAD21
chr6	44094520	44094729	chr6	44119544	44120038	24815	54	137	7	-5.01714	2.95184	RAD21
chr8	55081861	55082180	chr8	55344081	55344660	261901	123	64	8	-4.81218	4.08096	RAD21
chr18	29190932	29191127	chr18	29264974	29265591	73847	51	125	5	-5.54126	2.63481	RAD21
chr16	24321158	24321382	chr16	24516070	24516558	194688	22	153	3	-5.92426	2.76482	RAD21
chr15	41149823	41150253	chr15	41186188	41186760	35935	277	310	56	-3.30989	4.70952	RAD21
chr15	41149823	41150253	chr15	41184041	41184367	33788	277	165	43	-3.20756	4.79584	RAD21
chr1	113261344	113261581	chr1	113346598	113347358	85017	92	318	21	-4.1948	4.05861	RAD21
chr22	32924906	32925287	chr22	33192939	33193395	267652	109	138	4	-6.84601	2.03228	RAD21
chr17	28452301	28452616	chr17	28663404	28664042	210788	105	245	6	-6.5717	2.15049	RAD21
chr14	92116123	92116834	chr14	92324807	92325236	207973	125	64	6	-5.40368	3.33827	RAD21
chr14	92116123	92116834	chr14	92365673	92365895	248839	125	24	3	-5.80914	3.03498	RAD21
chr14	92116123	92116834	chr14	92377812	92378325	260978	125	73	4	-6.34618	2.52189	RAD21
chr14	92116123	92116834	chr14	92463111	92463623	346277	125	82	5	-6.01616	3.02863	RAD21
chr10	73596411	73597300	chr10	73648431	73649472	51131	162	86	14	-4.26383	3.84103	RAD21
chr10	73596411	73597300	chr10	73656165	73656898	58865	162	293	13	-5.63787	2.47651	RAD21
chr11	73966723	73967399	chr11	74160289	74160835	192890	119	157	5	-6.61649	2.04703	RAD21
chr11	73966723	73967399	chr11	74032522	74032947	65123	119	88	10	-4.65129	3.50948	RAD21
chr12	104451468	104451946	chr12	104502571	104503602	50625	122	208	22	-3.95947	4.14739	RAD21
chr6	80487679	80488344	chr6	80577824	80578205	89480	130	129	9	-5.3329	2.91672	RAD21
chr1	66846052	66846362	chr1	66901959	66902432	55597	60	92	4	-5.84354	2.25397	RAD21
chr16	29712706	29713062	chr16	29740566	29740904	27504	336	38	6	-5.87118	2.12586	RAD21
chr7	50709145	50709356	chr7	50746777	50747380	37421	15	161	3	-5.59223	2.43822	RAD21
chr22	46396915	46397084	chr22	46512142	46512832	115058	29	463	7	-5.6132	2.75272	RAD21
chr4	6909540	6909853	chr4	6988284	6988964	78431	109	87	6	-5.57374	2.62122	RAD21
chr19	47251840	47252024	chr19	47343437	47343743	91413	50	90	3	-6.21461	2.02562	RAD21
chr11	83004030	83004342	chr11	83434973	83435394	430631	64	159	6	-5.64427	3.46585	RAD21
chr11	83004030	83004342	chr11	83527542	83527985	523200	64	135	4	-6.29157	2.87732	RAD21
chr11	83004030	83004342	chr11	83433654	83433903	429312	64	108	4	-6.06843	3.05185	RAD21
chr4	78016439	78017037	chr4	78124500	78125265	107463	186	337	32	-4.11436	4.24757	RAD21
chr17	27966494	27966995	chr17	28106031	28106609	139036	153	196	18	-4.52781	3.98318	RAD21
chr19	17215669	17215809	chr19	17246184	17246660	30375	52	75	5	-5.04986	2.94779	RAD21
chr12	49457659	49458086	chr12	49628250	49628567	170164	108	134	6	-5.99645	2.6069	RAD21
chr14	75412981	75413627	chr14	75554954	75555757	141327	144	172	11	-5.32152	3.17885	RAD21
chr16	86597285	86598004	chr16	87331493	87331849	733489	334	47	4	-6.8887	2.36135	RAD21
chr10	25402097	25402433	chr10	25516015	25516364	113582	50	54	7	-4.00919	4.38534	RAD21
chr8	101692825	101693772	chr8	101839154	101839749	145382	214	256	20	-4.91969	3.61311	RAD21
chr15	72077195	72077364	chr15	72447799	72448947	370435	30	319	5	-5.94751	3.12581	RAD21
chr3	56736561	56737081	chr3	56833325	56833879	96244	316	246	18	-5.48033	2.7992	RAD21
chr3	56736561	56737081	chr3	56835955	56836461	98874	316	191	12	-6.0382	2.2423	RAD21
chr3	56736561	56737081	chr3	56834295	56834461	97214	316	255	17	-5.63058	2.65051	RAD21
chr6	118973013	118973160	chr6	119097514	119098143	124354	90	131	5	-6.15613	2.24091	RAD21
chr4	153421821	153422773	chr4	153655861	153656201	233088	294	207	9	-6.62185	2.16547	RAD21
chr19	16882302	16882724	chr19	17163336	17163612	280612	146	51	9	-4.52098	4.4186	RAD21
chr8	122654525	122654962	chr8	122842317	122842618	187355	122	49	3	-6.49862	2.14938	RAD21
chr2	85153892	85154592	chr2	85241880	85242194	87288	587	158	24	-5.08151	3.16316	RAD21
chr2	85153892	85154592	chr2	85241601	85241742	87009	587	132	25	-4.82008	3.42894	RAD21
chr7	95545667	95546489	chr7	96656824	96657325	1110335	196	221	14	-5.39816	3.70323	RAD21
chr4	79534518	79534676	chr4	79785195	79786370	250519	336	419	55	-3.84032	5.03983	RAD21
chr4	79534518	79534676	chr4	79697905	79698450	163229	336	167	12	-5.96529	2.61198	RAD21
chr2	201766167	201766755	chr2	202042108	202042648	275353	170	192	12	-5.42348	3.49318	RAD21
chr1	229393723	229394367	chr1	229617710	229618161	223343	203	103	18	-4.16719	4.64392	RAD21
chr15	77267196	77267342	chr15	77316558	77317042	49216	160	121	8	-5.71208	2.36314	RAD21
chr1	6306655	6307561	chr1	6535517	6535915	227956	330	44	5	-6.36441	2.41369	RAD21
chr9	100174835	100175058	chr9	100377699	100378243	202641	190	190	9	-6.0996	2.6095	RAD21
chr1	65152341	65152918	chr1	65289851	65290272	136933	69	98	6	-5.23556	3.24492	RAD21
chr8	52575888	52576404	chr8	52920784	52921420	344380	131	392	9	-6.45201	2.59075	RAD21
chr3	136110520	136111156	chr3	136470814	136471572	359658	128	350	12	-5.74015	3.31997	RAD21
chr11	14330627	14330819	chr11	14380591	14380857	49772	83	73	4	-5.93671	2.13745	RAD21
chr11	14330627	14330819	chr11	14380027	14380167	49208	83	75	5	-5.51745	2.56041	RAD21
chr7	36513426	36513643	chr7	36710420	36710817	196777	110	107	8	-5.21443	3.50096	RAD21
chr15	74419618	74420552	chr15	74600116	74600584	179564	383	147	15	-5.52237	3.12908	RAD21
chr2	231578371	231579206	chr2	231662514	231662888	83308	177	226	11	-5.80089	2.41045	RAD21
chr2	231578371	231579206	chr2	231662926	231664184	83720	177	275	12	-5.82311	2.38958	RAD21
chr12	93896634	93897152	chr12	94372551	94373342	475399	109	182	6	-6.31184	2.83653	RAD21
chr2	134642377	134642787	chr2	135208304	135208816	565517	154	162	5	-6.90567	2.30853	RAD21
chr3	120280001	120280613	chr3	120513699	120514464	233086	176	242	21	-4.57038	4.25592	RAD21
chr3	113455119	113455920	chr3	113631692	113632113	175772	184	141	7	-6.27188	2.34305	RAD21
chr1	227950083	227950567	chr1	228134280	228134615	183713	109	59	5	-5.55001	3.11413	RAD21
chr15	69022640	69023363	chr15	69168125	69168482	144762	145	250	26	-3.982	4.57595	RAD21
chr7	140217550	140218200	chr7	140353099	140353650	134899	149	179	20	-4.19987	4.29803	RAD21
chr11	64626982	64627305	chr11	64655141	64655945	27836	32	102	3	-5.89348	2.10502	RAD21
chr8	145704415	145704683	chr8	145734967	145735431	30284	79	119	6	-5.56505	2.43792	RAD21
chr7	37472877	37473037	chr7	37871745	37872539	398708	27	397	3	-7.08255	2.03356	RAD21
chr5	154352040	154352437	chr5	154407550	154407928	55113	85	88	6	-5.33647	2.7685	RAD21
chr19	51524349	51524609	chr19	51599839	51600003	75230	32	61	3	-5.37939	2.80636	RAD21
chr19	51524349	51524609	chr19	51600656	51600944	76047	32	73	3	-5.55897	2.62606	RAD21
chr2	176279696	176279942	chr2	176961778	176962738	681836	37	216	4	-6.21361	2.98309	RAD21
chr1	247553350	247553938	chr1	247739871	247740234	185933	131	52	4	-6.05385	2.60249	RAD21
chr15	70273142	70273296	chr15	70390173	70390586	116877	200	258	14	-5.57316	2.80222	RAD21
chr15	70273142	70273296	chr15	70388340	70388526	115044	200	129	7	-6.26631	2.08494	RAD21
chr15	70273142	70273296	chr15	70328862	70329300	55566	200	117	8	-5.90161	2.1947	RAD21
chr2	15282167	15282403	chr2	15317322	15317522	34919	46	27	3	-4.92725	3.09102	RAD21
chr13	33161135	33161325	chr13	33213386	33214146	52061	316	116	19	-4.62045	3.48333	RAD21
chr14	50296711	50297102	chr14	50571268	50572051	274166	38	294	5	-6.10229	2.80261	RAD21
chr3	149230021	149230663	chr3	149434989	149435723	204326	158	162	9	-5.75574	2.9672	RAD21
chr14	104544252	104544739	chr14	105030288	105030745	485549	98	92	3	-6.90953	2.26624	RAD21
chr12	62975619	62976079	chr12	63187617	63188362	211538	114	253	19	-4.38071	4.39489	RAD21
chr1	8620861	8621767	chr1	8786526	8786882	164759	291	139	13	-5.4779	3.12133	RAD21
chr12	11706647	11707395	chr12	12185538	12186977	478143	173	490	12	-6.37788	2.77405	RAD21
chr10	90161748	90162088	chr10	90312668	90313520	150580	61	245	6	-6.02861	2.49377	RAD21
chr11	11049677	11050125	chr11	11287497	11288008	237372	110	89	5	-5.97024	2.84071	RAD21
chr8	30084942	30085587	chr8	30413850	30414081	328263	216	147	11	-5.56992	3.45087	RAD21
chr8	30084942	30085587	chr8	30413285	30413809	327698	216	130	11	-5.44702	3.57342	RAD21
chr11	31418731	31419259	chr11	32028191	32028931	608932	101	91	4	-6.35339	2.84156	RAD21
chr11	31418731	31419259	chr11	31979538	31980132	560279	101	168	5	-6.52021	2.67209	RAD21
chr11	31418731	31419259	chr11	31892602	31892972	473343	101	98	4	-6.4275	2.72422	RAD21
chr3	19390137	19391118	chr3	19584554	19585156	193436	257	186	11	-5.97903	2.70441	RAD21
chr3	178864848	178865719	chr3	179033559	179034285	167840	190	273	10	-6.25133	2.33491	RAD21
chr9	12723751	12724087	chr9	13088528	13089139	364441	48	92	3	-6.19577	2.87282	RAD21
chr19	6738197	6738356	chr19	6862745	6863178	124389	328	317	33	-4.5589	3.87703	RAD21
chr8	131814686	131815422	chr8	131869780	131870017	54358	202	29	4	-5.90297	2.18875	RAD21
chr10	69548028	69548686	chr10	69915905	69916572	367219	73	163	8	-5.22533	3.83915	RAD21
chr15	99949279	99949557	chr15	100244363	100245021	294806	56	336	5	-6.62359	2.32486	RAD21
chr15	99949279	99949557	chr15	100243950	100244271	294393	56	265	5	-6.38621	2.56372	RAD21
chr11	90209552	90209953	chr11	90981339	90981826	771386	40	66	3	-5.68131	3.47366	RAD21
chr19	45596742	45597046	chr19	45629184	45629722	32138	109	77	5	-5.81628	2.19586	RAD21
chr19	45596742	45597046	chr19	45634328	45634590	37282	109	35	4	-5.47411	2.55576	RAD21
chr12	104775425	104776456	chr12	105270687	105271452	494231	356	256	24	-5.064	4.04206	RAD21
chr1	152319610	152319963	chr1	152413282	152413808	93319	63	106	4	-6.03399	2.21955	RAD21
chr16	12990385	12990863	chr16	13547574	13548227	556711	57	120	5	-5.61167	3.5328	RAD21
chr14	103541822	103542284	chr14	103651703	103652140	109419	142	71	7	-5.32669	3.01862	RAD21
chr2	235044179	235045012	chr2	235453593	235453944	408581	191	85	7	-5.8031	3.29719	RAD21
chr2	235044179	235045012	chr2	235409019	235409510	364007	191	223	17	-4.99302	4.067	RAD21
chr3	192284347	192285002	chr3	192520692	192521206	235690	172	131	14	-4.74458	4.08459	RAD21
chr6	56223918	56224689	chr6	56460372	56460579	235683	326	75	6	-6.52087	2.27548	RAD21
chr5	132757195	132757398	chr5	133279979	133280528	522581	39	253	4	-6.42436	2.75036	RAD21
chr17	55935321	55936097	chr17	56071649	56071791	135552	330	204	26	-4.60102	3.88956	RAD21
chr17	55935321	55936097	chr17	56076881	56077172	140784	330	86	10	-5.64827	2.83997	RAD21
chr17	55935321	55936097	chr17	56072785	56073151	136688	330	239	25	-4.8378	3.65225	RAD21
chr10	49423396	49423967	chr10	49497556	49497996	73589	106	116	17	-3.7506	4.4666	RAD21
chr19	34532882	34533219	chr19	34636243	34637088	103024	49	244	9	-4.99454	3.32713	RAD21
chr14	25074578	25075005	chr14	25148007	25148662	73002	121	195	19	-4.17991	4.0247	RAD21
chr13	103567772	103568857	chr13	103792440	103793234	223583	405	340	67	-3.42345	5.40384	RAD21
chr8	87631196	87631787	chr8	87797459	87797850	165672	91	85	4	-6.18092	2.39912	RAD21
chr6	34494795	34495461	chr6	35107179	35107355	611718	98	339	5	-7.19209	2.05396	RAD21
chr2	150454003	150454634	chr2	152095199	152095854	1640565	149	174	5	-6.94413	2.30311	RAD21
chr2	150454003	150454634	chr2	151907903	151908571	1453269	149	112	4	-6.94986	2.30185	RAD21
chr11	60033023	60033697	chr11	60112960	60113293	79263	265	82	15	-4.57035	3.65072	RAD21
chr15	45455192	45455651	chr15	45560414	45560622	104763	171	24	3	-6.12249	2.18353	RAD21
chr21	45663843	45664427	chr21	45717173	45717850	52746	179	270	11	-5.99002	2.09421	RAD21
chr16	57024406	57024546	chr16	57075330	57075475	50784	85	79	4	-6.03951	2.0368	RAD21
chr3	41935455	41936037	chr3	42270225	42270740	334188	126	264	6	-6.82871	2.19788	RAD21
chr3	41935455	41936037	chr3	42271274	42271709	335237	126	221	6	-6.65093	2.37771	RAD21
chr4	54774762	54775224	chr4	55083769	55084630	308545	80	265	11	-5.16597	3.82589	RAD21
chr4	54774762	54775224	chr4	55099453	55099964	324229	80	254	6	-6.33584	2.67553	RAD21
chr4	54774762	54775224	chr4	55100363	55100860	325139	80	303	6	-6.51224	2.49989	RAD21
chr16	55978004	55978749	chr16	56236790	56237343	258041	99	109	7	-5.39465	3.48009	RAD21
chr16	55978004	55978749	chr16	56315069	56315322	336320	99	35	4	-5.37788	3.65409	RAD21
chr16	55978004	55978749	chr16	56352132	56352709	373383	99	156	6	-6.06146	3.01585	RAD21
chr5	73280931	73281176	chr5	73945382	73945615	664206	41	361	5	-6.38357	2.82319	RAD21
chr5	73280931	73281176	chr5	73944312	73945303	663136	41	327	5	-6.28466	2.91529	RAD21
chr1	209750026	209750501	chr1	209866167	209866708	115666	116	170	10	-5.28422	3.09195	RAD21
chr12	21760676	21761066	chr12	21832900	21833169	71834	60	97	7	-4.77724	3.4083	RAD21
chr19	51207565	51207759	chr19	51286653	51287198	78894	56	189	5	-6.04822	2.13806	RAD21
chr18	3380689	3380923	chr18	3585123	3586487	204200	25	199	3	-6.31496	2.39333	RAD21
chr12	110950273	110950752	chr12	111039795	111040363	89043	162	351	21	-4.85934	3.39836	RAD21
chr4	155320587	155321074	chr4	155427423	155427857	106349	62	93	5	-5.44086	2.88722	RAD21
chr16	3108768	3109867	chr16	3137224	3137467	27357	289	28	10	-4.39346	3.57833	RAD21
chr7	143077652	143077808	chr7	143106004	143106241	28196	76	32	3	-5.59924	2.39603	RAD21
chr7	143077652	143077808	chr7	143113441	143114140	35633	76	165	9	-5.04223	2.97979	RAD21
chr2	99225240	99225500	chr2	99452455	99453043	226955	105	296	8	-6.18544	2.59348	RAD21
chr2	99225240	99225500	chr2	99453569	99454107	228069	105	335	7	-6.57627	2.19789	RAD21
chr18	66327572	66327976	chr18	66402842	66403448	74866	57	154	5	-5.86113	2.31176	RAD21
chr6	11585618	11586198	chr6	12603604	12604048	1017406	182	220	6	-7.01412	2.25967	RAD21
chr10	2971086	2971265	chr10	3020118	3020869	48853	205	120	23	-3.83951	4.25944	RAD21
chr11	121190008	121190380	chr11	121460779	121461278	270399	151	496	19	-5.33498	3.57128	RAD21
chr11	121190008	121190380	chr11	121461298	121462733	270918	151	643	21	-5.39438	3.5123	RAD21
chr15	91191323	91191969	chr15	91235602	91236002	43633	304	240	44	-3.62929	4.44127	RAD21
chr13	99083449	99083646	chr13	99325071	99326014	241425	26	290	4	-6.15539	2.66299	RAD21
chr5	170911429	170911802	chr5	171285387	171285628	373585	91	53	3	-6.28393	2.79568	RAD21
chr3	17300167	17300803	chr3	17882300	17883186	581497	165	377	7	-7.14637	2.08645	RAD21
chr19	44506796	44507675	chr19	44598353	44598640	90678	71	45	3	-5.87212	2.37177	RAD21
chr4	166458116	166458779	chr4	167012881	167013668	554102	112	168	9	-5.44801	3.6877	RAD21
chr13	24627416	24628084	chr13	24794054	24795043	165970	184	300	40	-3.54096	5.12593	RAD21
chr2	225987509	225987903	chr2	226525098	226525676	537195	99	239	18	-4.29084	4.78651	RAD21
chr2	26074814	26075400	chr2	26100269	26100470	24869	120	38	4	-5.65249	2.33083	RAD21
chr8	38269051	38269464	chr8	38571863	38572277	302399	334	194	17	-5.41257	3.56489	RAD21
chr14	29226396	29226665	chr14	29691906	29692231	465241	67	56	3	-6.03282	3.10196	RAD21
chr1	162025768	162026262	chr1	162361749	162362264	335487	121	86	4	-6.47755	2.55175	RAD21
chr1	162025768	162026262	chr1	162246222	162246705	219960	121	93	10	-4.72322	4.06723	RAD21
chr2	152146799	152147032	chr2	152266133	152266820	119101	70	81	4	-5.87036	2.50873	RAD21
chr2	152146799	152147032	chr2	152266938	152267302	119906	70	101	4	-6.09103	2.28673	RAD21
chr3	46317935	46318631	chr3	46414059	46414379	95428	212	230	12	-5.82485	2.4435	RAD21
chr3	46317935	46318631	chr3	46410057	46410493	91426	212	361	30	-4.44307	3.83491	RAD21
chr22	31847773	31848242	chr22	32029799	32030217	181557	52	184	7	-5.27436	3.39121	RAD21
chr2	75146602	75146769	chr2	75291944	75292543	145175	235	129	7	-6.42758	2.05853	RAD21
chr2	75146602	75146769	chr2	75209774	75210032	63005	235	53	7	-5.53806	2.59462	RAD21
chr2	147841015	147841238	chr2	148089369	148090077	248131	288	259	31	-4.35181	4.5142	RAD21
chr5	188630	189085	chr5	217986	218314	28901	83	30	4	-5.04745	2.94301	RAD21
chr1	218433076	218433521	chr1	219985649	219986369	1552128	40	132	3	-6.37446	2.80584	RAD21
chr3	58318401	58318789	chr3	58400215	58400737	81426	124	108	12	-4.5326	3.69815	RAD21
chr3	184072070	184072398	chr3	184258874	184259282	186476	58	80	3	-6.24525	2.40725	RAD21
chr11	33384862	33385072	chr11	33709298	33709830	324226	228	168	22	-4.37122	4.64925	RAD21
chr5	129107068	129107420	chr5	129477388	129477772	369968	122	105	6	-5.87446	3.19777	RAD21
chr20	35464166	35464316	chr20	35491848	35492710	27532	102	220	9	-5.62415	2.36893	RAD21
chr13	48860891	48861283	chr13	49153109	49154249	291826	39	370	4	-6.80448	2.13486	RAD21
chr2	74477195	74477751	chr2	74560380	74560598	82629	186	105	9	-5.48526	2.72992	RAD21
chr2	74477195	74477751	chr2	74626936	74627439	149185	186	74	6	-5.94629	2.57265	RAD21
chr11	131737586	131738126	chr11	131996845	131997284	258719	244	88	8	-5.81562	3.0545	RAD21
chr1	180484920	180485504	chr1	180832004	180832897	346500	115	247	15	-4.83822	4.20482	RAD21
chr12	67843378	67843654	chr12	67877733	67877910	34079	48	71	3	-5.93666	2.08271	RAD21
chr22	18941961	18942245	chr22	20273287	20273564	1331042	115	108	5	-6.20819	2.96422	RAD21
chr9	129468728	129469094	chr9	129543818	129544492	74724	202	289	37	-3.75286	4.46895	RAD21
chr9	115249536	115249737	chr9	115427400	115428079	177663	109	140	6	-6.04947	2.5791	RAD21
chr1	90308562	90308710	chr1	90461277	90461419	152567	139	46	4	-5.99053	2.54149	RAD21
chr1	206899704	206900258	chr1	206982781	206983274	82523	272	371	21	-5.43296	2.78288	RAD21
chr12	14782844	14783580	chr12	14817084	14817791	33504	284	229	26	-4.5665	3.44287	RAD21
chr12	14782844	14783580	chr12	14869795	14870150	86215	284	70	8	-5.73859	2.48699	RAD21
chr2	97269956	97270104	chr2	97466457	97467086	196353	35	128	3	-6.21015	2.47634	RAD21
chr10	124802704	124803257	chr10	125318451	125319332	515194	152	425	13	-5.94607	3.2043	RAD21
chr1	220863383	220863761	chr1	220906267	220906785	42506	39	96	8	-4.06903	3.99149	RAD21
chr2	216814470	216815364	chr2	216878122	216878522	62758	178	102	7	-5.91494	2.20844	RAD21
chr4	39528405	39528642	chr4	39639002	39640644	110360	94	178	6	-6.14156	2.19053	RAD21
chr4	39528405	39528642	chr4	39640697	39640870	112055	94	149	6	-5.96372	2.38027	RAD21
chr13	77241707	77242091	chr13	77477487	77478289	235396	50	199	6	-5.62181	3.19041	RAD21
chr13	47127141	47127351	chr13	47253657	47254317	126306	278	117	9	-5.99535	2.41479	RAD21
chr13	47127141	47127351	chr13	47268109	47268483	140758	278	51	6	-5.97593	2.50279	RAD21
chr13	47127141	47127351	chr13	47294876	47295903	167525	278	237	26	-4.57949	4.05977	RAD21
chr10	104153572	104154171	chr10	104182246	104182798	28075	126	103	8	-5.31213	2.67828	RAD21
chr9	138859350	138859750	chr9	139014655	139015181	154905	182	334	17	-5.34872	3.21362	RAD21
chr8	130951203	130951385	chr8	131027965	131028129	76580	139	171	9	-5.68169	2.50279	RAD21
chr7	66094297	66094498	chr7	66119895	66120081	25397	65	73	4	-5.69226	2.29393	RAD21
chr6	157008088	157008780	chr6	157097603	157097817	88823	205	166	14	-5.15688	3.09338	RAD21
chrX	30159884	30160434	chrX	30522270	30522821	361836	130	149	7	-5.97966	3.0844	RAD21
chr12	48935858	48936593	chr12	49011991	49012848	75398	265	278	66	-2.82804	5.41809	RAD21
chr7	38438346	38438797	chr7	38579636	38579849	140839	131	26	3	-5.93607	2.54418	RAD21
chr7	38438346	38438797	chr7	38672116	38672257	233319	131	21	3	-5.7225	3.08251	RAD21
chr7	38438346	38438797	chr7	38700172	38700534	261375	131	83	7	-5.40222	3.48089	RAD21
chr8	134581668	134582371	chr8	134898294	134898790	315923	285	173	11	-6.00999	2.98885	RAD21
chr3	108062107	108062255	chr3	108107172	108107377	44917	60	51	3	-5.82895	2.22876	RAD21
chr9	33813753	33814303	chr9	33852271	33852661	37968	155	125	18	-4.091	3.94248	RAD21
chr14	68734994	68735814	chr14	68772536	68773316	36722	121	173	8	-5.7902	2.23777	RAD21
chr18	56203933	56204116	chr18	56230531	56230869	26415	132	110	7	-5.69146	2.29854	RAD21
chr22	50587490	50588108	chr22	50675638	50675896	87530	274	36	8	-5.03776	3.20897	RAD21
chr22	50587490	50588108	chr22	50630844	50631047	42736	274	54	6	-6.01859	2.02981	RAD21
chr22	43058574	43058878	chr22	43112781	43113023	53903	205	49	6	-5.63131	2.46345	RAD21
chr1	207752709	207753059	chr1	207845908	207846260	92849	27	70	3	-5.34711	2.91859	RAD21
chr6	111378414	111379040	chr6	111531269	111531900	152229	137	252	10	-5.84424	2.69096	RAD21
chr18	51435997	51436501	chr18	51645731	51646334	209230	90	182	9	-5.30937	3.43829	RAD21
chr10	30287203	30287709	chr10	30530605	30530745	242896	166	60	8	-5.04745	3.79383	RAD21
chr19	39050237	39050674	chr19	39110285	39110426	59611	47	70	4	-5.32605	2.79787	RAD21
chr4	122113360	122114340	chr4	122173143	122173898	58803	361	183	36	-3.93133	4.21828	RAD21
chr4	122113360	122114340	chr4	122228669	122229538	114329	361	281	23	-5.25624	3.1142	RAD21
chr12	27192837	27193359	chr12	27458701	27459557	265342	118	232	10	-5.61225	3.27775	RAD21
chr12	27192837	27193359	chr12	27536851	27537356	343492	118	134	5	-6.44965	2.59181	RAD21
chr11	72001942	72002298	chr11	72124732	72125652	122434	60	151	4	-6.33904	2.04467	RAD21
chr11	72001942	72002298	chr11	72141774	72142464	139476	60	236	9	-5.16373	3.33169	RAD21
chr11	72001942	72002298	chr11	72144984	72145632	142686	60	94	4	-5.86505	2.62618	RAD21
chr9	79073765	79074790	chr9	79273365	79273924	198575	197	393	11	-6.46122	2.22555	RAD21
chr2	232789989	232790318	chr2	233006586	233007165	216268	214	176	21	-4.44742	4.33888	RAD21
chr2	232789989	232790318	chr2	233157281	233157705	366963	214	85	4	-7.03604	2.04184	RAD21
chr2	232789989	232790318	chr2	233095308	233095712	304990	214	68	8	-5.4266	3.55607	RAD21
chr1	210621713	210622201	chr1	211307419	211307811	685218	85	183	5	-6.43326	2.77915	RAD21
chr1	89401531	89401981	chr1	89920530	89921090	518549	39	137	3	-6.38632	2.78501	RAD21
chr4	37604550	37605311	chr4	37782400	37782900	177089	282	80	10	-5.41876	3.22767	RAD21
chr4	37604550	37605311	chr4	37795092	37795557	189781	282	109	13	-5.20336	3.49035	RAD21
chr3	122661647	122662140	chr3	122747325	122748004	85185	147	156	14	-4.76217	3.47979	RAD21
chr8	72740200	72740766	chr8	73067225	73067794	326459	275	231	8	-6.90031	2.11254	RAD21
chr13	27948731	27949242	chr13	28286615	28286864	337373	176	38	3	-6.61085	2.42127	RAD21
chr15	43517421	43518000	chr15	43577704	43578224	59704	155	280	37	-3.45638	4.7076	RAD21
chr15	43517421	43518000	chr15	43561002	43561296	43002	155	70	12	-4.32211	3.73946	RAD21
chr12	32608159	32609227	chr12	32908054	32908321	298827	250	280	13	-6.02635	2.93746	RAD21
chr12	32608159	32609227	chr12	32824854	32825295	215627	250	144	31	-3.6233	5.17968	RAD21
chr12	32608159	32609227	chr12	32908795	32909648	299568	250	342	12	-6.38646	2.57552	RAD21
chr2	177516990	177517413	chr2	178013283	178013951	495870	115	326	6	-6.94831	2.23512	RAD21
chr16	80559902	80560918	chr16	80886102	80886499	325184	377	83	9	-5.95664	3.05801	RAD21
chr8	2480803	2481239	chr8	2671887	2672440	190648	68	115	11	-4.16865	4.55756	RAD21
chr9	77880207	77880958	chr9	78097569	78097781	216611	117	33	3	-6.06146	2.69002	RAD21
chr18	18551805	18552147	chr18	18759326	18760039	207179	30	149	4	-5.63255	3.10158	RAD21
chr1	36348527	36349029	chr1	36554188	36554679	205159	55	73	3	-6.10057	2.61606	RAD21
chr10	104676994	104677938	chr10	105004229	105004900	326291	300	289	35	-4.25951	4.76379	RAD21
chr10	104676994	104677938	chr10	105093483	105093664	415545	300	43	4	-6.69239	2.43206	RAD21
chr10	104676994	104677938	chr10	105093741	105094085	415803	300	50	4	-6.84322	2.28481	RAD21
chr14	75075562	75076125	chr14	75270950	75271259	194825	95	55	4	-5.78862	2.90472	RAD21
chr17	43250298	43250438	chr17	43275070	43275700	24632	15	231	3	-5.95324	2.03596	RAD21
chr1	1342271	1342972	chr1	1376234	1376635	33262	53	57	4	-5.24075	2.77158	RAD21
chr19	14472602	14472908	chr19	14516824	14517382	43916	67	179	7	-5.50026	2.55651	RAD21
chr9	100472827	100473680	chr9	100663171	100663679	189491	199	154	14	-5.05214	3.64502	RAD21
chr11	45392751	45393162	chr11	45792846	45794040	399684	85	257	8	-5.83284	3.26229	RAD21
chr11	45392751	45393162	chr11	45676799	45677142	283637	85	47	4	-5.52021	3.41407	RAD21
chr12	48336213	48336422	chr12	48558821	48559356	222399	29	183	4	-5.80419	2.9699	RAD21
chr19	40403954	40404606	chr19	40476361	40477169	71755	54	191	8	-5.08237	3.09566	RAD21
chr13	99492404	99492729	chr13	99685883	99686498	193154	74	90	3	-6.60665	2.05806	RAD21
chr22	37662912	37663519	chr22	37824820	37825437	161301	139	137	6	-6.27094	2.28861	RAD21
chr22	37662912	37663519	chr22	37710993	37711164	47474	139	65	6	-5.52534	2.54547	RAD21
chrX	146557625	146557823	chrX	146920004	146920417	362181	29	52	3	-5.12131	3.93785	RAD21
chr1	161456547	161457541	chr1	161708543	161709072	251002	193	216	12	-5.66816	3.18399	RAD21
chr1	161456547	161457541	chr1	161711155	161711651	253614	193	234	16	-5.17283	3.69396	RAD21
chr8	52926820	52927332	chr8	53320040	53320881	392708	117	208	6	-6.51619	2.58481	RAD21
chr20	55974674	55975134	chr20	56070047	56070657	94913	171	334	16	-5.40763	2.86693	RAD21
chr1	161197108	161197684	chr1	161351779	161352281	154095	203	90	12	-4.8432	3.73171	RAD21
chr11	61938732	61939101	chr11	62078502	62078930	139401	74	125	5	-5.9135	2.56043	RAD21
chr11	61938732	61939101	chr11	61975532	61975879	36431	74	40	7	-4.10112	3.9231	RAD21
chr5	114884726	114885450	chr5	114921687	114922743	36237	188	240	16	-5.1719	2.85317	RAD21
chr5	114884726	114885450	chr5	114910148	114910444	24698	188	72	7	-5.62129	2.36066	RAD21
chr2	61021216	61021987	chr2	61225875	61226478	203888	214	336	28	-4.51868	4.2347	RAD21
chr7	127660302	127660491	chr7	127848438	127848938	187947	30	352	4	-6.49224	2.15797	RAD21
chr14	77536940	77537327	chr14	77560991	77561755	23664	228	241	15	-5.49804	2.47676	RAD21
chr1	70994387	70994822	chr1	71515450	71516200	520628	48	135	4	-6.00389	3.15097	RAD21
chr12	96972113	96972802	chr12	97380744	97381038	407942	169	188	16	-4.82116	4.25907	RAD21
chr12	96972113	96972802	chr12	97702378	97702754	729576	169	70	3	-7.18117	2.09081	RAD21
chr1	110319356	110320199	chr1	110523321	110523544	203122	372	88	15	-4.98013	3.75938	RAD21
chr20	2187959	2188821	chr20	2327838	2328114	139017	141	96	7	-5.62129	2.85896	RAD21
chr20	2187959	2188821	chr20	2383258	2383568	194437	141	40	4	-5.86505	2.82489	RAD21
chr13	99521601	99522049	chr13	99685883	99686498	163834	71	90	10	-4.15732	4.48098	RAD21
chr2	209040080	209040597	chr2	209119641	209119843	79044	82	108	6	-5.50533	2.69382	RAD21
chr7	16117706	16118038	chr7	16604335	16604819	486297	52	146	8	-4.77597	4.31715	RAD21
chr3	71055890	71056519	chr3	71561157	71561572	504638	132	90	7	-5.49079	3.63621	RAD21
chr4	16291405	16292201	chr4	16445142	16445525	152941	157	64	10	-4.60996	3.96733	RAD21
chr2	74166571	74166898	chr2	74214646	74214899	47748	37	92	4	-5.36012	2.71384	RAD21
chr11	67413067	67413312	chr11	67465784	67466045	52472	90	32	3	-5.76832	2.31854	RAD21
chr4	75242569	75243051	chr4	75397623	75397940	154572	117	77	4	-6.33339	2.19622	RAD21
chr4	75242569	75243051	chr4	75596342	75596712	353291	117	75	4	-6.30707	2.74778	RAD21
chr4	75242569	75243051	chr4	75548106	75548638	305055	117	71	5	-5.80598	3.17345	RAD21
chr6	28367488	28368005	chr6	28411072	28411478	43067	92	46	5	-5.13155	2.92446	RAD21
chr1	145421518	145422216	chr1	145542837	145543297	120621	153	126	9	-5.47227	2.9233	RAD21
chr12	25403777	25404012	chr12	25539569	25541004	135557	60	437	7	-6.28246	2.16305	RAD21
chr12	48045502	48045895	chr12	48080442	48080763	34547	77	75	4	-5.8887	2.13199	RAD21
chr12	12941692	12942284	chr12	13136316	13136768	194032	146	73	4	-6.50148	2.16919	RAD21
chr12	12941692	12942284	chr12	12974932	12975173	32648	146	34	4	-5.73738	2.27592	RAD21
chr5	7762458	7762692	chr5	7816307	7816777	53615	27	145	4	-5.49998	2.59591	RAD21
chr1	197662014	197662509	chr1	197837823	197838457	175314	74	163	7	-5.50599	3.13163	RAD21
chrX	117761338	117761743	chrX	117941295	117941783	179552	66	163	4	-6.51082	2.10994	RAD21
chr1	226612102	226613026	chr1	226735391	226735789	122365	111	103	6	-5.76074	2.6364	RAD21
chr10	70997198	70997817	chr10	71167617	71167844	169800	238	93	6	-6.42135	2.16689	RAD21
chr16	10936978	10937229	chr16	10962483	10962698	25254	21	46	3	-4.67594	3.28813	RAD21
chr12	1800799	1800948	chr12	1825609	1825804	24661	70	25	3	-5.27015	2.70373	RAD21
chr2	110303696	110304411	chr2	110420455	110420896	116044	291	63	12	-4.84664	3.54117	RAD21
chr2	110303696	110304411	chr2	110493719	110494227	189308	291	77	11	-5.22134	3.47035	RAD21
chr11	63246162	63246899	chr11	63403026	63403805	156127	322	242	49	-3.47985	5.14737	RAD21
chr13	47126235	47126382	chr13	47294876	47295903	168494	254	237	28	-4.34099	4.3097	RAD21
chr3	184802772	184802956	chr3	185025824	185026522	222868	20	225	3	-6.21461	2.55215	RAD21
chr16	87812588	87813142	chr16	87904820	87905524	91678	442	337	57	-3.82529	4.46702	RAD21
chr13	28443204	28443707	chr13	28527751	28528465	84044	69	132	5	-5.89803	2.31448	RAD21
chr1	24476566	24477557	chr1	24517498	24517742	39941	91	73	5	-5.58244	2.4579	RAD21
chr2	238533194	238533598	chr2	238653467	238654098	119869	74	252	6	-6.24998	2.12391	RAD21
chr19	1618242	1618612	chr19	1650665	1650877	32053	70	118	5	-5.8003	2.21141	RAD21
chr13	71534988	71535513	chr13	72051924	72052226	516411	96	49	3	-6.25894	2.9058	RAD21
chr13	71534988	71535513	chr13	71793170	71793436	257657	96	37	5	-4.95639	3.92404	RAD21
chr5	139742678	139743341	chr5	140099832	140100083	356491	118	87	3	-7.03937	2.02311	RAD21
chr1	152371608	152371876	chr1	152413282	152413808	41406	31	106	3	-5.9002	2.14428	RAD21
chr4	115307757	115308391	chr4	115615702	115616451	307311	226	200	21	-4.62981	4.36429	RAD21
chr6	32793726	32794026	chr6	32835645	32836576	41619	66	319	10	-5.34968	2.69859	RAD21
chr6	130614947	130615377	chr6	131193335	131193800	577958	67	89	3	-6.4961	2.69973	RAD21
chr9	130496763	130497403	chr9	130631965	130632488	134562	324	277	14	-6.12665	2.31839	RAD21
chr1	116260186	116260585	chr1	116307245	116307532	46660	110	72	11	-4.18136	3.9014	RAD21
chr15	31521335	31521842	chr15	31558579	31558882	36737	96	92	5	-5.86726	2.16085	RAD21
chr15	31521335	31521842	chr15	31555529	31555865	33687	96	93	5	-5.87807	2.13969	RAD21
chr3	146307743	146308041	chr3	146356634	146356804	48593	75	49	3	-6.01208	2.05679	RAD21
chr11	85652343	85652846	chr11	86130026	86130348	477180	66	48	3	-5.86363	3.26887	RAD21
chr7	29917686	29918095	chr7	30101432	30102721	183337	82	248	6	-6.33663	2.30252	RAD21
chr7	1126294	1127117	chr7	1176368	1176508	49251	164	59	9	-4.78295	3.3052	RAD21
chr16	11501306	11501760	chr16	11907580	11908171	405820	128	181	6	-6.46701	2.64442	RAD21
chr11	47201129	47201372	chr11	47279539	47279756	78167	70	115	6	-5.40991	2.78763	RAD21
chr11	61665103	61665513	chr11	61875428	61875911	209915	273	149	18	-4.83267	3.92818	RAD21
chr11	61665103	61665513	chr11	61849174	61850121	183661	273	298	32	-4.37509	4.32431	RAD21
chr9	79062444	79062982	chr9	79319473	79320248	256491	284	319	13	-6.28427	2.57285	RAD21
chr9	79062444	79062982	chr9	79273365	79273924	210383	284	393	18	-5.84204	2.89615	RAD21
chr2	152146369	152146635	chr2	152266938	152267302	120303	67	101	4	-6.04722	2.33341	RAD21
chr2	152146369	152146635	chr2	152266133	152266820	119498	67	81	4	-5.82655	2.55542	RAD21
chr17	7418024	7418473	chr17	7464894	7465219	46421	108	416	21	-4.62377	3.4528	RAD21
chr17	7418024	7418473	chr17	7463725	7464725	45252	108	359	23	-4.29447	3.77955	RAD21
chrX	77166355	77166675	chrX	77280128	77280663	113453	155	138	10	-5.36551	2.99833	RAD21
chr2	75692793	75693025	chr2	75835968	75836741	142943	298	259	24	-4.89781	3.62321	RAD21
chr2	75692793	75693025	chr2	75835760	75835934	142735	298	224	23	-4.83775	3.68396	RAD21
chr1	39657974	39658517	chr1	39724056	39724913	65539	265	264	43	-3.63328	4.55206	RAD21
chr1	202243792	202244104	chr1	202688696	202689081	444592	42	246	4	-6.47041	2.66954	RAD21
chr1	24136182	24136654	chr1	24243189	24243632	106535	256	312	31	-4.42021	3.9306	RAD21
chr1	45121251	45121587	chr1	45142863	45143159	21276	57	47	3	-5.69597	2.27471	RAD21
chr17	2752109	2752529	chr17	2916087	2916685	163558	128	228	15	-4.86528	3.74897	RAD21
chr13	21872515	21872662	chr13	22051044	22051623	178382	171	115	15	-4.4705	4.20989	RAD21
chr18	56448572	56449382	chr18	56722991	56723151	273609	279	230	32	-4.13782	4.79198	RAD21
chr18	56448572	56449382	chr18	56735168	56735444	285786	279	60	5	-6.50668	2.4212	RAD21
chr18	56448572	56449382	chr18	56724233	56725039	274851	279	385	46	-3.92717	5.00805	RAD21
chr2	165998174	165998468	chr2	166060363	166060926	61895	52	141	13	-3.7701	4.39709	RAD21
chr14	64193461	64193838	chr14	64236869	64237263	43031	143	112	7	-5.78952	2.26155	RAD21
chr3	194392168	194393149	chr3	194674870	194675206	281721	101	73	3	-6.70836	2.20717	RAD21
chr12	108964561	108964942	chr12	109011137	109012576	46195	140	437	27	-4.4299	3.64766	RAD21
chr1	42642436	42643056	chr1	42801419	42801663	158363	140	88	6	-5.83546	2.72596	RAD21
chr10	101195772	101196361	chr10	101371741	101372519	175380	88	162	5	-6.34606	2.26512	RAD21
chr2	45251966	45252283	chr2	45721469	45722495	469186	34	224	3	-6.74078	2.42021	RAD21
chr12	13326632	13326863	chr12	13355887	13356211	29024	41	55	3	-5.52368	2.47379	RAD21
chr1	114519664	114519816	chr1	114825269	114825873	305453	49	147	7	-4.99043	3.99703	RAD21
chr11	63604498	63605487	chr11	63674026	63674426	68539	330	65	12	-5.00367	3.16272	RAD21
chr11	63604498	63605487	chr11	63669217	63669385	63730	330	35	7	-5.46262	2.67454	RAD21
chr6	130560200	130560519	chr6	130603246	130603939	42727	72	149	7	-5.38879	2.66392	RAD21
chr18	77958178	77958460	chr18	78015688	78016071	57228	58	123	8	-4.71374	3.41241	RAD21
chr3	193505681	193506400	chr3	193855485	193855904	349085	280	170	16	-5.22541	3.82106	RAD21
chr3	193505681	193506400	chr3	194032882	194034073	526482	280	487	16	-6.27788	2.8916	RAD21
chr3	187036505	187037850	chr3	187396617	187397793	358767	344	391	45	-4.19602	4.85498	RAD21
chr3	124070476	124071127	chr3	124278616	124279072	207489	129	92	4	-6.60901	2.10207	RAD21
chr8	123691126	123691423	chr8	124077538	124078219	386115	75	116	3	-6.87385	2.22578	RAD21
chr12	75953952	75954327	chr12	76740731	76741366	786404	70	182	3	-7.25528	2.02836	RAD21
chr11	77850061	77850356	chr11	77899611	77899822	49255	65	56	3	-6.00251	2.06885	RAD21
chr11	77850061	77850356	chr11	77898883	77899555	48527	65	50	3	-5.88919	2.18107	RAD21
chr17	39894150	39894777	chr17	40111707	40112027	216930	245	52	5	-6.23363	2.51501	RAD21
chr19	49601007	49601474	chr19	49649090	49649430	47616	92	89	6	-5.42691	2.64568	RAD21
chr20	15689695	15690004	chr20	15910943	15911369	220939	79	42	3	-5.90989	2.85778	RAD21
chr20	15689695	15690004	chr20	16456464	16457042	766460	79	154	8	-5.24752	3.87297	RAD21
chr8	96902659	96903154	chr8	97192352	97192712	289198	154	141	7	-6.09389	2.84685	RAD21
chr8	96902659	96903154	chr8	97176503	97176953	273349	154	227	20	-4.47044	4.45435	RAD21
chr7	101331424	101332218	chr7	101458799	101459016	126581	292	406	16	-6.13793	2.26997	RAD21
chr3	155869574	155870014	chr3	156227285	156228103	357271	374	321	17	-6.02927	3.02951	RAD21
chr12	685061	685726	chr12	923422	923788	237696	223	282	9	-6.65463	2.1448	RAD21
chr12	685061	685726	chr12	922640	922896	236914	223	239	8	-6.72475	2.07125	RAD21
chr15	101555379	101555936	chr15	101798345	101798875	242409	107	289	7	-6.44744	2.36856	RAD21
chr15	101555379	101555936	chr15	101797102	101797312	241166	107	243	7	-6.27407	2.54156	RAD21
chr17	42281048	42281636	chr17	42408488	42409092	126852	91	162	5	-6.37958	2.02359	RAD21
chr17	42281048	42281636	chr17	42422950	42423446	141314	91	117	6	-5.68951	2.80017	RAD21
chr17	42281048	42281636	chr17	42422440	42422690	140804	91	99	6	-5.52246	2.96949	RAD21
chr2	231968700	231969289	chr2	232276684	232277500	307395	163	185	6	-6.73059	2.24577	RAD21
chr17	27945049	27945279	chr17	28087308	28087849	142029	118	78	5	-5.90852	2.57828	RAD21
chr2	177679385	177679965	chr2	178011811	178012339	331846	174	336	13	-5.84627	3.17882	RAD21
chr2	177679385	177679965	chr2	178013283	178013951	333318	174	326	15	-5.52985	3.49801	RAD21
chr21	45577698	45577905	chr21	45616094	45616554	38189	60	60	4	-5.4161	2.6175	RAD21
chr20	54823076	54823387	chr20	54918674	54919391	95287	92	118	5	-6.0736	2.18887	RAD21
chr22	22339290	22339653	chr22	23284781	23285360	945128	82	220	7	-5.90853	3.25766	RAD21
chr22	22339290	22339653	chr22	23296817	23297207	957164	82	531	6	-7.09796	2.18315	RAD21
chr1	214434762	214435361	chr1	214502108	214502514	66747	203	230	42	-3.27595	4.92238	RAD21
chr1	214434762	214435361	chr1	214505162	214505521	69801	203	193	10	-5.97073	2.17857	RAD21
chr22	19743965	19744451	chr22	19897490	19897951	153039	83	189	8	-5.5017	3.04779	RAD21
chr1	88646194	88646748	chr1	88768672	88769166	121924	88	56	3	-6.30546	2.07667	RAD21
chr1	88646194	88646748	chr1	89060940	89061463	414192	88	79	6	-5.26327	3.82891	RAD21
chr11	108568479	108569240	chr11	108605714	108606079	36474	203	81	11	-4.91186	3.11387	RAD21
chr11	108568479	108569240	chr11	108741831	108742229	172591	203	73	9	-5.20922	3.42838	RAD21
chr7	148893852	148894010	chr7	148981857	148982396	87847	68	58	4	-5.50736	2.73074	RAD21
chr15	91846104	91846598	chr15	92396426	92396599	549828	131	34	3	-6.20433	2.96888	RAD21
chr1	219377987	219378307	chr1	219985649	219986369	607342	56	132	3	-6.71093	2.50494	RAD21
chr1	219377987	219378307	chr1	219834002	219834931	455695	56	204	5	-6.1246	3.00984	RAD21
chr1	219377987	219378307	chr1	219740607	219741124	362300	56	112	3	-6.54663	2.52152	RAD21
chr7	55955054	55955213	chr7	56031946	56032402	76733	35	93	3	-5.89072	2.28958	RAD21
chr19	1546759	1546920	chr19	1795683	1796251	248763	172	84	5	-6.35944	2.47555	RAD21
chr19	1546759	1546920	chr19	1767069	1767922	220149	172	249	12	-5.69513	3.07487	RAD21
chr19	1546759	1546920	chr19	1766870	1767011	219950	172	201	12	-5.48099	3.29307	RAD21
chr6	12504396	12505005	chr6	12894032	12894481	389027	97	100	3	-6.98266	2.12162	RAD21
chr10	74454270	74454658	chr10	74593914	74594373	139256	70	129	5	-5.88943	2.58447	RAD21
chr4	138956812	138957497	chr4	139011599	139012043	54102	156	125	7	-5.98635	2.10294	RAD21
chrX	51384341	51384753	chrX	51603718	51604141	218965	82	42	5	-4.92551	3.85779	RAD21
chr1	110088740	110089359	chr1	110192291	110192612	102932	194	27	4	-5.79111	2.51333	RAD21
chr1	110088740	110089359	chr1	110172899	110173298	83540	194	60	8	-5.20332	3.02191	RAD21
chr14	65637565	65638023	chr14	65673143	65673964	35120	85	142	8	-5.2396	2.78074	RAD21
chr14	65637565	65638023	chr14	65672022	65672411	33999	85	120	7	-5.33832	2.67768	RAD21
chr12	124521064	124521721	chr12	125256346	125256727	734625	212	168	7	-6.58873	2.6384	RAD21
chr19	14317551	14317739	chr19	14459100	14459694	141361	20	194	3	-6.06637	2.41264	RAD21
chr12	25144461	25145210	chr12	25271873	25272364	126663	347	65	11	-5.22792	3.20291	RAD21
chr12	25144461	25145210	chr12	25283573	25284221	138363	347	235	47	-3.60862	4.9243	RAD21
chr18	42158955	42159445	chr18	42792247	42793324	632802	107	407	8	-6.52276	2.68799	RAD21
chr16	25025078	25025235	chr16	25049953	25050291	24718	74	31	3	-5.54083	2.4394	RAD21
chr13	79998104	79998574	chr13	80115376	80116137	116802	112	173	13	-4.74189	3.65196	RAD21
chr14	21536549	21536984	chr14	21571749	21571951	34765	159	124	7	-5.99737	2.0245	RAD21
chr4	4490080	4490734	chr4	4882176	4882745	391442	263	101	11	-5.39148	3.69146	RAD21
chr2	24644525	24644965	chr2	25048019	25048172	403054	158	65	5	-6.01811	3.08267	RAD21
chr1	160765787	160766071	chr1	160800300	160800715	34229	55	161	6	-5.50522	2.51255	RAD21
chr12	49246603	49247437	chr12	49330127	49330572	82690	228	121	11	-5.42935	2.7873	RAD21
chr2	26394452	26394676	chr2	26552772	26553319	158096	42	168	6	-5.27811	3.30007	RAD21
chr19	17505815	17506139	chr19	17531466	17531630	25327	97	45	5	-5.1625	2.81226	RAD21
chr5	140809845	140810387	chr5	140937264	140937862	126877	156	232	13	-5.36669	3.06174	RAD21
chr6	118886349	118887050	chr6	119097514	119098143	210464	239	131	10	-5.74649	2.99419	RAD21
chr6	118886349	118887050	chr6	119121421	119122171	234371	239	156	8	-6.36744	2.4282	RAD21
chr12	124389886	124390356	chr12	124469619	124469768	79263	62	158	6	-5.60621	2.59163	RAD21
chr12	124389886	124390356	chr12	124468289	124468917	77933	62	136	5	-5.82091	2.36626	RAD21
chr3	118603569	118604073	chr3	118753585	118753980	149512	127	59	5	-5.70285	2.82515	RAD21
chr9	113800289	113800533	chr9	113911274	113911628	110741	85	58	4	-5.73051	2.61235	RAD21
chr9	113800289	113800533	chr9	114061291	114061987	260758	85	303	6	-6.57287	2.29125	RAD21
chr5	122783832	122783991	chr5	122847529	122847763	63538	42	90	3	-6.04025	2.08329	RAD21
chr22	37713661	37713821	chr22	37853168	37853945	139347	314	262	24	-4.96163	3.53882	RAD21
chr22	37713661	37713821	chr22	37824820	37825437	110999	314	137	28	-4.00496	4.37684	RAD21
chr7	116231869	116232200	chr7	116426631	116427245	194431	131	158	7	-6.04597	2.63886	RAD21
chr1	26602077	26602591	chr1	26690327	26690850	87736	118	134	12	-4.69871	3.55629	RAD21
chr1	26602077	26602591	chr1	26647893	26648583	45302	118	263	13	-5.21294	2.85226	RAD21
chr17	18803706	18804050	chr17	18832065	18832361	28015	34	78	4	-5.11048	2.87655	RAD21
chr12	96883034	96883558	chr12	96910095	96910966	26537	138	293	13	-5.47753	2.50898	RAD21
chr14	89802679	89803119	chr14	89850581	89850763	47462	63	55	4	-5.37788	2.69466	RAD21
chr10	116063629	116064544	chr10	116197491	116197869	132947	167	38	6	-5.17206	3.29046	RAD21
chr10	116063629	116064544	chr10	116218645	116219081	154101	167	43	6	-5.29567	3.26488	RAD21
chr17	25681576	25681794	chr17	25928617	25929141	246823	213	347	20	-5.21915	3.6293	RAD21
chr18	8654309	8655315	chr18	8988053	8988726	332738	242	197	13	-5.64224	3.38459	RAD21
chr12	3994188	3994555	chr12	4385829	4386529	391274	154	333	12	-5.87528	3.21482	RAD21
chr15	74675581	74675768	chr15	74782013	74782804	106245	524	163	13	-6.22534	2.08547	RAD21
chr15	74675581	74675768	chr15	74730937	74731504	55169	524	391	90	-3.23058	4.91338	RAD21
chr15	74675581	74675768	chr15	74726292	74726598	50524	524	96	17	-5.15941	2.92906	RAD21
chr11	119077395	119077702	chr11	119155307	119155729	77605	133	108	10	-4.96731	3.23796	RAD21
chr17	27292661	27292947	chr17	27443944	27444585	150997	131	118	5	-6.42701	2.08461	RAD21
chr10	52321350	52321986	chr10	52384124	52384414	62138	85	214	7	-5.91681	2.20418	RAD21
chr10	52321350	52321986	chr10	52384974	52385244	62988	85	188	7	-5.78727	2.33981	RAD21
chr11	45132184	45132589	chr11	45353752	45354563	221163	117	182	12	-4.99637	3.79149	RAD21
chr11	45132184	45132589	chr11	45315059	45315443	182470	117	78	9	-4.72443	3.96078	RAD21
chr8	75000411	75000765	chr8	75256978	75257410	256213	74	157	6	-5.77679	3.08737	RAD21
chr6	39948781	39949242	chr6	40276216	40276885	326974	84	143	8	-5.23478	3.78548	RAD21
chr8	95091926	95092742	chr8	95514928	95515237	422186	229	36	3	-6.82002	2.3134	RAD21
chr15	65809428	65809718	chr15	65903334	65903938	93616	55	130	4	-6.10228	2.15129	RAD21
chr17	8476123	8476543	chr17	8649031	8649863	172488	75	295	10	-5.39929	3.23183	RAD21
chr4	120133801	120133950	chr4	120207216	120208170	73266	91	215	8	-5.72261	2.44672	RAD21
chr7	142340034	142340707	chr7	142564042	142564360	223335	148	47	5	-5.62848	3.15193	RAD21
chr3	81920954	81921294	chr3	82181968	82182539	260674	55	139	4	-6.16922	2.70069	RAD21
chr1	22029851	22030127	chr1	22108637	22109232	78510	30	98	3	-5.78894	2.40149	RAD21
chr8	30404758	30405105	chr8	30458159	30458692	53054	99	172	9	-5.34817	2.74802	RAD21
chr3	100181650	100182175	chr3	100309180	100309863	127005	206	209	23	-4.39922	4.05388	RAD21
chr3	100181650	100182175	chr3	100353598	100354013	171423	206	86	6	-6.1987	2.4028	RAD21
chr15	93347162	93347436	chr15	93460902	93461746	113466	35	185	4	-6.00312	2.34665	RAD21
chr10	112562999	112564140	chr10	112632436	112632748	68296	246	130	10	-5.7677	2.38029	RAD21
chr10	112562999	112564140	chr10	112653226	112653907	89086	246	174	15	-5.24829	3.00126	RAD21
chr20	50744927	50745427	chr20	50767008	50767613	21581	155	79	7	-5.52105	2.44553	RAD21
chr12	51663305	51663700	chr12	51734903	51735783	71203	103	336	18	-4.6711	3.51418	RAD21
chr18	741874	742298	chr18	830583	831240	88285	155	148	17	-4.37421	3.89035	RAD21
chrX	135793396	135793628	chrX	136007214	136007904	213586	60	125	6	-5.33914	3.41977	RAD21
chr9	139682120	139682423	chr9	139929404	139930177	246981	135	247	8	-6.25578	2.576	RAD21
chr14	39191017	39191599	chr14	39336643	39337178	145044	90	96	8	-4.90527	3.62626	RAD21
chr1	3481747	3482342	chr1	3535552	3535978	53210	134	101	11	-4.71717	3.39039	RAD21
chr3	159602537	159603195	chr3	159724232	159724728	121037	267	198	21	-4.78647	3.62721	RAD21
chr2	174749153	174749458	chr2	174904484	174905023	155026	63	166	4	-6.48253	2.04423	RAD21
chr5	146477638	146478083	chr5	146568347	146568807	90264	52	159	12	-4.05033	4.23049	RAD21
chr1	47854370	47854894	chr1	48175965	48176594	321071	88	206	6	-6.22169	2.78485	RAD21
chr1	234635788	234636032	chr1	235246469	235247548	610437	369	301	17	-5.95148	3.21971	RAD21
chr2	98326391	98326698	chr2	98364927	98365189	38229	55	40	3	-5.49899	2.5347	RAD21
chr17	55320216	55321273	chr17	55817262	55817627	495989	426	97	7	-6.73733	2.43755	RAD21
chr17	55320216	55321273	chr17	55824750	55825401	503477	426	232	14	-6.22306	2.93448	RAD21
chr15	77925803	77926239	chr15	78112683	78112829	186444	76	75	5	-5.42935	3.24716	RAD21
chr15	77925803	77926239	chr15	78113738	78114196	187499	76	108	7	-5.12104	3.56788	RAD21
chr15	77925803	77926239	chr15	78167419	78167769	241180	76	60	4	-5.65249	3.17398	RAD21
chr17	55320216	55321273	chr17	55485812	55485974	164539	426	55	7	-6.16995	2.40595	RAD21
chr6	124123594	124124246	chr6	125117108	125117336	992862	127	45	3	-6.45362	2.76419	RAD21
chr6	124123594	124124246	chr6	125435363	125435751	1311117	127	68	3	-6.86647	2.38213	RAD21
chr7	2926586	2927095	chr7	3195143	3195289	268048	257	359	34	-4.37968	4.53439	RAD21
chr7	2926586	2927095	chr7	3194293	3194867	267198	257	324	33	-4.3368	4.5759	RAD21
chr5	59818188	59818339	chr5	59894263	59894595	75924	94	66	4	-5.96036	2.21479	RAD21
chr5	59818188	59818339	chr5	59893446	59894033	75107	94	61	4	-5.88158	2.29187	RAD21
chr5	14727121	14728152	chr5	15003358	15004019	275206	394	270	51	-3.71112	5.22768	RAD21
chr15	64719183	64719484	chr15	64973604	64973995	254120	54	112	3	-6.51026	2.33697	RAD21
chr5	139252067	139252212	chr5	139347945	139348914	95733	23	346	4	-6.20934	2.05248	RAD21
chr8	22094738	22095218	chr8	22224549	22224759	129331	130	98	5	-6.23363	2.18463	RAD21
chr2	192430925	192431564	chr2	192555279	192556218	123715	236	345	45	-3.69405	4.75931	RAD21
chr5	13987986	13988472	chr5	14270107	14270929	281635	215	208	7	-6.81636	2.09766	RAD21
chr1	36808266	36808745	chr1	36834535	36835042	25790	111	111	10	-4.81389	3.15616	RAD21
chr11	102665225	102665519	chr11	102811461	102812266	145942	38	155	4	-5.90842	2.59699	RAD21
chr11	73018034	73018979	chr11	73045929	73046940	26950	292	370	71	-3.0649	4.88092	RAD21
chr1	92775274	92775557	chr1	93064575	93065355	289018	121	165	8	-5.74285	3.20135	RAD21
chr16	19178950	19179440	chr16	19386660	19387587	207220	173	369	17	-5.39766	3.34237	RAD21
chr1	213188802	213188957	chr1	213243545	213244214	54588	39	69	3	-5.70044	2.39579	RAD21
chr17	7124173	7124589	chr17	7199452	7200177	74863	111	187	7	-6.04882	2.11965	RAD21
chr19	48216450	48216778	chr19	48293734	48293891	76956	45	75	3	-5.92693	2.25352	RAD21
chr12	104872186	104872656	chr12	104977253	104977401	104597	94	83	4	-6.18955	2.11427	RAD21
chr5	131573737	131574512	chr5	131651619	131651793	77107	148	27	4	-5.52046	2.67001	RAD21
chr5	108016841	108017470	chr5	108774401	108774940	756931	207	90	5	-6.61365	2.6163	RAD21
chr11	100553039	100553359	chr11	100800344	100800501	246985	134	197	6	-6.59752	2.22863	RAD21
chr11	100553039	100553359	chr11	100699053	100699364	145694	134	54	5	-5.66795	2.84363	RAD21
chr11	100553039	100553359	chr11	100726083	100726711	172724	134	151	9	-5.52067	3.1074	RAD21
chr17	78193282	78193729	chr17	78237191	78237537	43462	44	67	3	-5.79166	2.261	RAD21
chr2	223182628	223183184	chr2	223478427	223478801	295243	293	107	8	-6.19412	2.75979	RAD21
chr5	58330190	58330521	chr5	58469988	58470437	139467	40	71	4	-5.17897	3.31598	RAD21
chr17	4613094	4613842	chr17	4785210	4785773	171368	131	139	6	-6.22615	2.37427	RAD21
chr8	215681	216085	chr8	896843	897110	680758	143	41	3	-6.47919	2.73602	RAD21
chr1	223704951	223705455	chr1	223871686	223872432	166231	77	150	12	-4.38463	4.25591	RAD21
chr4	111236681	111236972	chr4	111432076	111432464	195104	115	170	7	-5.98891	2.69971	RAD21
chr4	111236681	111236972	chr4	111430065	111430372	193093	115	139	7	-5.78759	2.90014	RAD21
chr4	111236681	111236972	chr4	111440076	111440370	203104	115	102	5	-6.15103	2.55814	RAD21
chr5	134208605	134208753	chr5	134241105	134241599	32352	32	269	5	-5.84157	2.17149	RAD21
chr9	116569627	116570089	chr9	116725305	116725714	155216	132	65	4	-6.2846	2.24926	RAD21
chr14	61928231	61928862	chr14	62197368	62197885	268506	290	95	6	-6.64024	2.24316	RAD21
chr14	61928231	61928862	chr14	62304279	62304796	375417	290	289	36	-4.16927	4.89105	RAD21
chr19	49378532	49378785	chr19	49404078	49404531	25293	47	84	4	-5.50838	2.47353	RAD21
chr19	49378532	49378785	chr19	49403228	49403815	24443	47	68	4	-5.29707	2.6764	RAD21
chr10	112117203	112117365	chr10	112214943	112215088	97578	188	22	3	-6.13026	2.14219	RAD21
chr2	220406160	220406831	chr2	220507234	220507636	100403	165	213	24	-4.11113	4.21665	RAD21
chr9	32378574	32379601	chr9	32572137	32573236	192536	349	234	15	-5.89429	2.78856	RAD21
chr9	32378574	32379601	chr9	32581537	32581901	201936	349	113	11	-5.78667	2.9285	RAD21
chr9	32378574	32379601	chr9	32579642	32580178	200041	349	174	33	-4.02111	4.73572	RAD21
chr11	112160154	112160434	chr11	112426423	112426864	265989	171	67	11	-4.55057	4.35626	RAD21
chr11	27317960	27318376	chr11	27507267	27507856	188891	43	121	3	-6.35977	2.2975	RAD21
chr3	114546244	114547000	chr3	114810768	114811627	263768	193	272	9	-6.47404	2.39946	RAD21
chr3	114546244	114547000	chr3	114800384	114800634	253384	193	36	6	-5.26269	3.6021	RAD21
chr17	53434018	53434516	chr17	53591017	53591812	156501	114	199	7	-6.13768	2.40626	RAD21
chr1	23999641	23999852	chr1	24077601	24078293	77749	21	147	3	-5.83773	2.34825	RAD21
chr2	134876975	134877526	chr2	135169239	135170027	291713	493	257	29	-5.01499	3.94327	RAD21
chr5	136656057	136656611	chr5	136834762	136835198	178151	102	135	8	-5.37136	3.28011	RAD21
chr13	45945081	45945624	chr13	46064096	46064661	118472	117	92	8	-5.12508	3.26814	RAD21
chr17	37363268	37363701	chr17	37400922	37401426	37221	213	163	15	-5.03894	2.99047	RAD21
chr19	18392145	18392286	chr19	18416194	18416348	23908	137	76	15	-3.83461	4.10079	RAD21
chr19	18392145	18392286	chr19	18433165	18433400	40879	137	155	8	-5.80452	2.23852	RAD21
chr19	18392145	18392286	chr19	18414356	18414617	22070	137	72	6	-5.61313	2.35818	RAD21
chr12	113573912	113574055	chr12	113612166	113612669	38111	39	111	4	-5.6005	2.43263	RAD21
chr10	64926475	64927111	chr10	65388339	65389980	461228	120	345	10	-6.02587	3.10733	RAD21
chr20	49837256	49837400	chr20	49923224	49923765	85824	65	149	7	-5.28651	2.94703	RAD21
chr17	57824086	57824621	chr17	57936717	57937254	112096	113	167	8	-5.6865	2.66379	RAD21
chr2	218515484	218515844	chr2	218577992	218578927	62148	62	307	10	-5.24881	2.88692	RAD21
chr19	30220813	30221738	chr19	30363890	30364991	142152	233	390	23	-5.1462	3.36346	RAD21
chr19	30220813	30221738	chr19	30363452	30363603	141714	233	294	19	-5.24574	3.25879	RAD21
chr11	15122583	15123142	chr11	15229763	15230754	106621	183	243	37	-3.48071	4.89063	RAD21
chr11	15122583	15123142	chr11	15180630	15181152	57488	183	103	24	-3.48811	4.66373	RAD21
chr18	22068780	22069185	chr18	22306571	22307108	237386	229	96	6	-6.41455	2.38838	RAD21
chr17	68632703	68633205	chr17	70536134	70536990	1902929	100	291	5	-7.05962	2.20171	RAD21
chr10	24931579	24932703	chr10	25369657	25370359	436954	289	181	22	-4.68284	4.40379	RAD21
chr17	79265536	79265854	chr17	79451196	79451763	185342	76	212	9	-5.29287	3.38419	RAD21
chr11	78356155	78356684	chr11	78811094	78811513	454410	173	102	8	-5.61938	3.49855	RAD21
chr10	75716569	75717392	chr10	75840549	75841418	123157	110	187	7	-6.03977	2.35446	RAD21
chr1	44843870	44844334	chr1	45060594	45061320	216260	89	163	9	-5.18794	3.58188	RAD21
chr9	134637630	134638360	chr9	135111666	135112193	473306	263	169	8	-6.54317	2.61272	RAD21
chr2	217563571	217563995	chr2	218375205	218375943	811210	89	282	10	-5.52537	3.61339	RAD21
chr2	30936856	30937458	chr2	31084861	31085221	147403	202	83	7	-5.83529	2.67912	RAD21
chr2	30936856	30937458	chr2	31392919	31393441	455461	202	189	9	-6.15557	2.97977	RAD21
chr15	70022336	70022476	chr15	70473722	70474054	451246	230	45	3	-7.04752	2.11369	RAD21
chr1	150848347	150848555	chr1	150894719	150895464	46164	50	156	7	-5.07006	3.00043	RAD21
chr8	144465708	144466164	chr8	144516927	144517358	50763	163	39	5	-5.53844	2.54536	RAD21
chr15	74425624	74425897	chr15	74595005	74595645	169108	77	188	8	-5.42136	3.19663	RAD21
chr1	226891333	226891633	chr1	226924962	226925149	33329	83	74	5	-5.50403	2.51023	RAD21
chr5	81047113	81047375	chr5	81147202	81147385	99827	151	70	11	-4.46998	3.8476	RAD21
chr5	81047113	81047375	chr5	81147538	81147935	100163	151	89	10	-4.90075	3.40943	RAD21
chr21	27259556	27259747	chr21	27542447	27542651	282700	25	200	3	-6.31997	2.60261	RAD21
chr21	27259556	27259747	chr21	27541396	27542155	281649	25	246	3	-6.52698	2.39056	RAD21
chr15	68851891	68852388	chr15	69217145	69217854	364757	58	112	3	-6.58172	2.48991	RAD21
chr8	42269768	42270615	chr8	42528980	42529627	258365	213	191	18	-4.83282	4.05126	RAD21
chr10	97989198	97989965	chr10	98052817	98053583	62852	205	325	36	-3.9398	4.22771	RAD21
chr1	16129883	16130172	chr1	16333561	16333868	203389	50	70	5	-4.94164	3.79957	RAD21
chr20	3767276	3767967	chr20	3800578	3801234	32611	263	174	17	-5.06478	2.94349	RAD21
chr2	106720644	106721371	chr2	107159237	107159624	437866	240	133	11	-5.5752	3.53621	RAD21
chr2	58133152	58133930	chr2	58675131	58675570	541201	321	138	13	-5.5688	3.57093	RAD21
chr7	150595511	150595970	chr7	150685531	150685945	89561	124	138	12	-4.77772	3.48419	RAD21
chr16	87583960	87584383	chr16	87669058	87669475	84675	53	172	8	-4.9589	3.27656	RAD21
chr16	87583960	87584383	chr16	87669909	87670394	85526	53	214	8	-5.17738	3.05717	RAD21
chr17	19140827	19141132	chr17	19241366	19241890	100234	29	73	3	-5.46053	2.83829	RAD21
chr3	147102627	147102857	chr3	147334807	147335214	231950	40	66	4	-5.10595	3.70738	RAD21
chr18	4106383	4106807	chr18	5057419	5058039	950612	57	152	7	-5.17511	3.91989	RAD21
chr1	66868062	66868222	chr1	66901959	66902432	33737	75	92	5	-5.6204	2.39609	RAD21
chr4	114702432	114703148	chr4	114829981	114830425	126833	149	88	5	-6.26241	2.14358	RAD21
chr2	55945260	55945908	chr2	56188344	56188936	242436	151	108	14	-4.4213	4.42959	RAD21
chr1	153777790	153778190	chr1	153917962	153918449	139772	76	153	5	-6.1423	2.32695	RAD21
chr1	153777790	153778190	chr1	153917783	153917928	139593	76	124	4	-6.37843	2.0833	RAD21
chr1	153777790	153778190	chr1	153919033	153919403	140843	76	150	5	-6.12249	2.35242	RAD21
chr10	102800867	102801292	chr10	102901816	102902432	100524	177	176	10	-5.74146	2.55283	RAD21
chr16	69458219	69459285	chr16	69601239	69601458	141954	69	122	5	-5.81925	2.66979	RAD21
chr16	69458219	69459285	chr16	69599610	69599761	140325	69	160	5	-6.0904	2.38296	RAD21
chr12	113487909	113488119	chr12	113530529	113530831	42410	334	91	15	-4.9059	3.14862	RAD21
chr12	113487909	113488119	chr12	113535922	113536532	47803	334	306	49	-3.75109	4.34312	RAD21
chr17	697992	698522	chr17	884267	884837	185745	73	136	4	-6.43053	2.21401	RAD21
chr17	697992	698522	chr17	899785	900385	201263	73	114	4	-6.25407	2.44676	RAD21
chr12	113487909	113488119	chr12	113612166	113612669	124047	334	111	11	-5.72488	2.68115	RAD21
chr17	72956829	72957056	chr17	73002894	73003133	45838	202	48	5	-5.96059	2.09912	RAD21
chr3	129209032	129209466	chr3	129548412	129548749	338946	134	134	6	-6.21216	2.82262	RAD21
chr15	79320485	79321271	chr15	79500628	79500844	179357	279	22	3	-6.52503	2.0946	RAD21
chr1	181159848	181160005	chr1	181392711	181393070	232706	221	181	32	-3.66519	5.17749	RAD21
chr1	181159848	181160005	chr1	181393960	181394596	233955	221	220	32	-3.86032	4.98138	RAD21
chr4	143274085	143274814	chr4	143641238	143641615	366424	112	71	4	-6.20859	2.86244	RAD21
chr6	117770609	117770865	chr6	118150860	118151491	379995	167	198	8	-6.24738	2.83829	RAD21
chr19	1445155	1445577	chr19	1478645	1478788	33068	80	35	3	-5.74015	2.27465	RAD21
chr19	1445155	1445577	chr19	1513866	1514185	68289	80	72	5	-5.43982	2.71562	RAD21
chr19	1445155	1445577	chr19	1512988	1513298	67411	80	63	5	-5.30629	2.84871	RAD21
chr19	1445155	1445577	chr19	1479352	1479649	33775	80	34	3	-5.71116	2.30597	RAD21
chr2	44787607	44788007	chr2	45182170	45183328	394163	87	435	9	-6.1468	2.94964	RAD21
chr1	115521481	115521659	chr1	115655196	115655884	133537	158	134	21	-3.87139	4.62813	RAD21
chr22	18447249	18447867	chr22	18483696	18484534	35829	64	118	5	-5.71069	2.3139	RAD21
chr10	13413723	13414319	chr10	13628527	13629134	214208	216	64	5	-6.31529	2.42325	RAD21
chr10	13413723	13414319	chr10	13578737	13579176	164418	216	58	6	-5.8522	2.73352	RAD21
chr10	13413723	13414319	chr10	13482426	13482851	68107	216	93	19	-4.019	4.16806	RAD21
chr5	42908864	42909349	chr5	43040942	43041099	131593	127	231	10	-5.68143	2.76147	RAD21
chr7	50181805	50182544	chr7	50436365	50437665	253821	159	462	10	-6.5993	2.24573	RAD21
chr18	72020440	72020848	chr18	72218961	72219674	198113	112	181	12	-4.94718	3.77944	RAD21
chr18	72020440	72020848	chr18	72143320	72143712	122472	112	54	7	-4.81566	3.60448	RAD21
chr18	72020440	72020848	chr18	72160808	72161202	139960	112	112	11	-4.64121	3.87153	RAD21
chr4	102090254	102090894	chr4	102518110	102518740	427216	250	81	5	-6.69703	2.43764	RAD21
chr4	102090254	102090894	chr4	102651573	102652159	560679	250	160	8	-6.43775	2.75037	RAD21
chr19	38734507	38734871	chr19	38826116	38826540	91245	64	235	8	-5.45959	2.79588	RAD21
chr6	30883160	30883808	chr6	31038520	31038742	154712	330	83	7	-6.32611	2.20432	RAD21
chr6	30883160	30883808	chr6	31036435	31037131	152627	330	148	18	-5.01556	3.54754	RAD21
chr9	139382938	139383393	chr9	139525749	139526220	142356	199	288	22	-4.77418	3.74742	RAD21
chr9	139382938	139383393	chr9	139524681	139525192	141288	199	245	22	-4.61248	3.90817	RAD21
chr17	37427189	37427551	chr17	37549883	37550429	122332	58	67	5	-5.04626	3.36771	RAD21
chr1	180502275	180503245	chr1	180832004	180832897	328759	171	247	40	-3.27329	5.75601	RAD21
chr1	180502275	180503245	chr1	180747935	180748390	244690	171	41	5	-5.63636	3.19954	RAD21
chr17	8093034	8093284	chr17	8124823	8124988	31539	72	97	7	-4.95956	3.04281	RAD21
chr4	1858114	1858286	chr4	1900711	1901685	42425	49	257	7	-5.54908	2.50132	RAD21
chr4	104936760	104937333	chr4	105781301	105782223	843968	82	407	6	-6.83201	2.41939	RAD21
chr6	44067918	44068069	chr6	44119544	44120038	51475	41	137	4	-5.86096	2.22063	RAD21
chr20	32045775	32045941	chr20	32254635	32254821	208694	220	277	26	-4.50145	4.26425	RAD21
chr15	56783255	56783785	chr15	57598343	57599428	814558	144	351	6	-7.24708	2.03829	RAD21
chr8	9226422	9227020	chr8	9688361	9688797	461341	152	318	10	-6.18076	2.95764	RAD21
chr11	72193269	72193726	chr11	72284380	72284920	90654	119	82	8	-5.02696	3.23486	RAD21
chr11	72193269	72193726	chr11	72264790	72265135	71064	119	61	4	-6.11741	2.03354	RAD21
chr2	228270616	228271374	chr2	228630831	228631463	359457	190	154	6	-6.70046	2.36466	RAD21
chr2	228270616	228271374	chr2	228443461	228443719	172087	190	32	3	-6.51554	2.07822	RAD21
chr3	59367209	59367350	chr3	59466519	59466763	99169	54	68	3	-6.01127	2.27117	RAD21
chr11	71802067	71802726	chr11	71892785	71893018	90059	122	29	3	-5.97409	2.26458	RAD21
chr20	34205658	34205826	chr20	34251709	34252209	45883	74	84	5	-5.51601	2.54853	RAD21
chr11	68400313	68400652	chr11	68855931	68856710	455279	40	218	3	-6.87615	2.28209	RAD21
chr11	17752542	17753003	chr11	18000289	18000559	247286	195	194	30	-3.73846	5.13553	RAD21
chr21	33158257	33158591	chr21	33630222	33631110	471631	45	309	8	-5.38112	3.73248	RAD21
chr5	93860533	93861147	chr5	94073620	94074000	212473	205	202	15	-5.21518	3.54351	RAD21
chr7	48008395	48008868	chr7	48194420	48194753	185552	148	97	5	-6.35305	2.29313	RAD21
chr22	35746625	35747396	chr22	35806151	35806592	58755	277	105	11	-5.48219	2.63499	RAD21
chr22	35746625	35747396	chr22	35806740	35807442	59344	277	115	13	-5.23905	2.88562	RAD21
chr22	35746625	35747396	chr22	35807487	35807679	60091	277	127	13	-5.33831	2.7873	RAD21
chr7	154997234	154997574	chr7	155091839	155092011	94265	64	80	4	-5.76832	2.49549	RAD21
chr7	154997234	154997574	chr7	155090889	155091064	93315	64	89	5	-5.42864	2.83763	RAD21
chr2	242331456	242331860	chr2	242537957	242538269	206097	98	32	3	-5.85348	2.8721	RAD21
chr3	55519099	55519681	chr3	55754668	55754997	234987	349	390	30	-5.01882	3.80358	RAD21
chr8	65480120	65480604	chr8	65830828	65831442	350224	94	193	5	-6.58711	2.4644	RAD21
chr2	134643842	134644817	chr2	135169239	135170027	524422	305	257	9	-6.87494	2.32124	RAD21
chr6	36733850	36734523	chr6	36985782	36986871	251259	231	600	14	-6.56123	2.27737	RAD21
chr12	8696643	8697537	chr12	8761589	8761958	64052	221	61	6	-5.92552	2.20254	RAD21
chr15	60651657	60652180	chr15	60812828	60813388	160648	146	127	6	-6.24427	2.31345	RAD21
chr15	60651657	60652180	chr15	60736462	60736686	84282	146	46	5	-5.59337	2.62673	RAD21
chr21	35882791	35883295	chr21	35975207	35975902	91912	229	258	33	-3.99367	4.29618	RAD21
chr5	81046755	81046935	chr5	81147202	81147385	100267	177	70	10	-4.81947	3.49288	RAD21
chr5	81046755	81046935	chr5	81147538	81147935	100603	177	89	9	-5.27034	3.03416	RAD21
chr13	114112653	114112929	chr13	114216707	114217142	103778	39	88	5	-4.92202	3.40477	RAD21
chrX	118252776	118253194	chrX	118400305	118400774	147111	78	89	4	-6.07276	2.43299	RAD21
chr13	53471631	53471867	chr13	53542147	53542592	70280	40	119	4	-5.69541	2.46216	RAD21
chr19	39047421	39047722	chr19	39109296	39109438	61574	82	88	6	-5.30054	2.83179	RAD21
chr10	15691511	15691719	chr10	15786330	15786673	94611	45	41	3	-5.32301	2.95184	RAD21
chr10	15691511	15691719	chr10	15757900	15758095	66181	45	19	3	-4.55388	3.61328	RAD21
chr11	124831776	124832502	chr11	125011473	125012065	178971	250	187	32	-3.8211	4.88134	RAD21
chr4	6911082	6911316	chr4	6988284	6988964	76968	137	87	8	-5.22701	2.96963	RAD21
chr20	20840759	20841356	chr20	21485524	21486399	644168	152	551	11	-6.53982	2.67426	RAD21
chr20	20840759	20841356	chr20	21486811	21487250	645455	152	585	10	-6.79032	2.44032	RAD21
chr20	47863026	47863371	chr20	47940281	47940580	76910	77	41	4	-5.28479	2.91027	RAD21
chr11	26318672	26319258	chr11	26671324	26671762	352066	65	94	4	-5.94509	3.10691	RAD21
chr11	76758014	76758342	chr11	76802038	76802667	43696	182	173	24	-4.00119	4.06676	RAD21
chr11	133004417	133004926	chr11	133704960	133705434	700034	114	100	11	-4.54558	4.53117	RAD21
chr11	116797906	116798200	chr11	116967256	116967649	169056	88	132	6	-5.77662	2.82967	RAD21
chr3	53409667	53409823	chr3	53744093	53744625	334270	193	161	10	-5.73892	3.28981	RAD21
chr3	129345596	129345760	chr3	129653289	129653737	307529	205	179	10	-5.90523	3.07843	RAD21
chr3	129345596	129345760	chr3	129543740	129544149	197980	205	175	10	-5.88263	2.81804	RAD21
chr3	129345596	129345760	chr3	129548412	129548749	202652	205	134	7	-6.32903	2.37413	RAD21
chr2	63919163	63919697	chr2	64115953	64116352	196256	103	112	4	-6.58064	2.09526	RAD21
chr10	43788577	43789250	chr10	43957133	43957796	167883	80	103	7	-5.12494	3.498	RAD21
chr16	48265689	48266255	chr16	48657074	48657649	390819	81	202	5	-6.48384	2.61496	RAD21
chr15	68155213	68156542	chr15	68346641	68348089	190099	391	152	13	-5.86269	2.813	RAD21
chr15	68155213	68156542	chr15	68343693	68343852	187151	391	63	9	-5.71739	2.9529	RAD21
chr21	47706644	47706884	chr21	47788492	47789126	81608	79	43	3	-5.93342	2.26752	RAD21
chr3	43920629	43921149	chr3	44239879	44240580	318730	110	243	7	-6.30172	2.70024	RAD21
chr15	91445463	91445809	chr15	91474932	91475222	29123	95	140	6	-5.912	2.09103	RAD21
chr15	91445463	91445809	chr15	91475731	91475945	29922	95	162	9	-5.24702	2.75078	RAD21
chr1	184044399	184045140	chr1	184632933	184633510	587793	142	99	4	-6.77836	2.43589	RAD21
chr12	15090676	15091176	chr12	15148532	15149317	57356	82	303	12	-5.15064	2.96742	RAD21
chr2	170384665	170385147	chr2	170624273	170624530	239126	89	150	6	-5.91575	2.90076	RAD21
chr9	129373797	129374272	chr9	129543818	129544492	169546	82	289	6	-6.48963	2.09543	RAD21
chr5	38382917	38383270	chr5	38809794	38810323	426524	68	152	5	-6.02451	3.09292	RAD21
chr3	112453395	112454144	chr3	112697932	112698506	243788	281	192	22	-4.71377	4.13541	RAD21
chr1	177225343	177225744	chr1	177915013	177915497	689269	69	110	6	-5.35107	3.78475	RAD21
chr1	235676916	235677516	chr1	235764278	235764767	86762	95	39	5	-4.99856	3.24546	RAD21
chr1	235676916	235677516	chr1	235946126	235946772	268610	95	120	9	-4.94692	3.96049	RAD21
chr8	54496291	54496553	chr8	54720781	54721084	224228	81	213	7	-5.86392	2.91404	RAD21
chr4	44450846	44451186	chr4	44496087	44496348	44901	50	33	3	-5.21131	2.85217	RAD21
chr3	38562745	38563399	chr3	38697228	38697533	133829	130	58	6	-5.34446	3.11778	RAD21
chr3	38562745	38563399	chr3	38692674	38693036	129275	130	115	11	-4.81668	3.63729	RAD21
chr6	138028793	138029570	chr6	138075665	138075989	46095	352	72	8	-5.98141	2.07898	RAD21
chr7	55348075	55348312	chr7	55482792	55483269	134480	249	178	26	-4.18304	4.31312	RAD21
chr22	39052591	39052886	chr22	39077606	39078255	24720	69	66	5	-5.20489	2.76781	RAD21
chr10	135252203	135252798	chr10	135422355	135422666	169557	86	32	5	-4.70121	3.94179	RAD21
chr6	117667236	117667765	chr6	118150860	118151491	483095	99	198	5	-6.66451	2.50051	RAD21
chr14	100707035	100707204	chr14	100745189	100745420	37985	85	36	3	-5.82895	2.20355	RAD21
chr17	60749712	60750024	chr17	61045706	61046224	295682	78	167	4	-6.70211	2.24761	RAD21
chr6	44235714	44236266	chr6	44272495	44272819	36229	215	60	7	-5.57316	2.45264	RAD21
chr6	44235714	44236266	chr6	44306182	44306706	69916	215	218	25	-4.31738	3.87048	RAD21
chr13	27571205	27571371	chr13	27745982	27746341	174611	35	161	3	-6.43953	2.16591	RAD21
chr13	27571205	27571371	chr13	27745408	27745593	174037	35	160	3	-6.4333	2.17026	RAD21
chr11	67397886	67398386	chr11	67458542	67459007	60156	208	63	8	-5.32179	2.80443	RAD21
[truncated: 18,891 more rows]
